# Supplementary material
Source: PubMed Central journal article supplement (PMC10327632)
Supplement: mmc1.pdf [file mmc1.pdf]

# THE LANCET

## **Supplementary appendix**

This appendix formed part of the original submission and has been peer reviewed. We post it as supplied by the authors.

Supplement to: COVID-19 Forecasting Team. Past SARS-CoV-2 infection protection against re-infection: a systematic review and meta-analysis. *Lancet* 2023; published online Feb 16. [https://doi.org/10.1016/S0140-6736\(22\)02465-5](https://doi.org/10.1016/S0140-6736(22)02465-5).

## Supplementary appendix “Past COVID-19 infection protection against reinfection: systematic review and meta-analysis”

This appendix provides further supplemental figures and more detailed results.

The appendix is organised into broad sections following the structure of the main paper.

## Table of Contents

|                                                                                                        |    |
|--------------------------------------------------------------------------------------------------------|----|
| Table of Contents.....                                                                                 | 2  |
| Section 1 List of acronyms and abbreviations .....                                                     | 3  |
| Section 2 Guidelines for Accurate and Transparent Health Estimates Reporting (GATHER) compliance ..... | 4  |
| Section 3 Preferred Reporting Items for Systematic Reviews and Meta-Analyses (PRISMA) compliance.....  | 5  |
| Section 4 Supplementary figures and tables .....                                                       | 8  |
| Figure S1 Forest plots of meta-analysis results by variant and outcome .....                           | 9  |
| Figure S2 Sensitivity analysis according to Risk of Bias assessment .....                              | 13 |
| Figure S3 Sensitivity analysis according to adjusted/unadjusted results .....                          | 18 |
| Figure S4 Publication bias assessment.....                                                             | 25 |
| Table S1 Data inputs and characteristics of included studies .....                                     | 28 |
| Table S2 Protection against reinfection, symptomatic, and severe disease by time since infection ..... | 50 |
| Table S3 Risk of Bias Assessment for Case-Control Studies .....                                        | 78 |
| Table S4 Risk of Bias Assessment for Cohort Studies .....                                              | 80 |
| Section 5 Reference list .....                                                                         | 84 |

## Section 1 List of acronyms and abbreviations

| <b>Abbreviation/acronym</b> | <b>Full phrase</b>                                                 |
|-----------------------------|--------------------------------------------------------------------|
| SARS-CoV-2                  | Severe acute respiratory syndrome coronavirus 2                    |
| PCR                         | Polymerase chain reaction                                          |
| RAT                         | Rapid antigen test                                                 |
| GATHER                      | Guidelines for Accurate and Transparent Health Estimates Reporting |
| PRISMA                      | Preferred Reporting Items for Systematic Reviews and Meta-Analyses |
| UI                          | Uncertainty Interval                                               |
| MR-BRT                      | Meta-regression—Bayesian, regularised, trimmed                     |
| GHDx                        | Global Health Data Exchange                                        |

## Section 2 Guidelines for Accurate and Transparent Health Estimates Reporting (GATHER) compliance

This study complies with GATHER recommendations,<sup>1</sup> See table S2 below for the GATHER checklist. The GATHER recommendations can be found on the [GATHER website](#).

### GATHER checklist

| Item #                                                                                         | Checklist item                                                                                                                                                                                                                                                                                                                                                                            | Reported location                                                                    |
|------------------------------------------------------------------------------------------------|-------------------------------------------------------------------------------------------------------------------------------------------------------------------------------------------------------------------------------------------------------------------------------------------------------------------------------------------------------------------------------------------|--------------------------------------------------------------------------------------|
| <b>Objectives and funding</b>                                                                  |                                                                                                                                                                                                                                                                                                                                                                                           |                                                                                      |
| 1                                                                                              | Define the indicator(s), populations (including age, sex, and geographic entities), and time period(s) for which estimates were made.                                                                                                                                                                                                                                                     | <i>Methods (Study selection and data extraction); appendix Table S1</i>              |
| 2                                                                                              | List the funding sources for the work.                                                                                                                                                                                                                                                                                                                                                    | <i>Summary</i>                                                                       |
| <b>Data Inputs</b>                                                                             |                                                                                                                                                                                                                                                                                                                                                                                           |                                                                                      |
| For all data inputs from multiple sources that are synthesized as part of the study:           |                                                                                                                                                                                                                                                                                                                                                                                           |                                                                                      |
| 3                                                                                              | Describe how the data were identified and how the data were accessed.                                                                                                                                                                                                                                                                                                                     | <i>Methods (Overview)</i>                                                            |
| 4                                                                                              | Specify the inclusion and exclusion criteria. Identify all ad-hoc exclusions.                                                                                                                                                                                                                                                                                                             | <i>Methods (Inclusion and exclusion criteria)</i>                                    |
| 5                                                                                              | Provide information on all included data sources and their main characteristics. For each data source used, report reference information or contact name/institution, population represented, data collection method, year(s) of data collection, sex and age range, diagnostic criteria or measurement method, and sample size, as relevant.                                             | <i>Appendix Table S1</i>                                                             |
| 6                                                                                              | Identify and describe any categories of input data that have potentially important biases (e.g., based on characteristics listed in item 5).                                                                                                                                                                                                                                              | <i>Methods (Risk of bias assessment); (appendix, table S3 and S4 page 78 and 80)</i> |
| For data inputs that contribute to the analysis but were not synthesized as part of the study: |                                                                                                                                                                                                                                                                                                                                                                                           |                                                                                      |
| 7                                                                                              | Describe and give sources for any other data inputs.                                                                                                                                                                                                                                                                                                                                      | <i>NA</i>                                                                            |
| For all data inputs:                                                                           |                                                                                                                                                                                                                                                                                                                                                                                           |                                                                                      |
| 8                                                                                              | Provide all data inputs in a file format from which data can be efficiently extracted (e.g., a spreadsheet rather than a PDF), including all relevant meta-data listed in item 5. For any data inputs that cannot be shared because of ethical or legal reasons, such as third-party ownership, provide a contact name or the name of the institution that retains the right to the data. | <i>Appendix, table S1 page 28</i>                                                    |
| <b>Data analysis</b>                                                                           |                                                                                                                                                                                                                                                                                                                                                                                           |                                                                                      |
| 9                                                                                              | Provide a conceptual overview of the data analysis method. A diagram may be helpful.                                                                                                                                                                                                                                                                                                      | <i>Methods (Data analysis)</i>                                                       |
| 10                                                                                             | Provide a detailed description of all steps of the analysis, including mathematical formulae. This description should cover, as relevant, data cleaning, data pre-processing, data adjustments and weighting of data sources, and mathematical or statistical model(s).                                                                                                                   | <i>Methods (Data analysis)</i>                                                       |
| 11                                                                                             | Describe how candidate models were evaluated and how the final model(s) were selected.                                                                                                                                                                                                                                                                                                    | <i>NA</i>                                                                            |
| 12                                                                                             | Provide the results of an evaluation of model performance, if done, as well as the results of any relevant sensitivity analysis.                                                                                                                                                                                                                                                          | <i>Appendix, figure S2 and S3, page 13 and 18</i>                                    |
| 13                                                                                             | Describe methods for calculating uncertainty of the estimates. State which sources of uncertainty were, and were not, accounted for in the uncertainty analysis.                                                                                                                                                                                                                          | <i>Methods (Data analysis)</i>                                                       |
| 14                                                                                             | State how analytic or statistical source code used to generate estimates can be accessed.                                                                                                                                                                                                                                                                                                 | <i>GitHub URL(s) will be made available</i>                                          |
| <b>Results and Discussion</b>                                                                  |                                                                                                                                                                                                                                                                                                                                                                                           |                                                                                      |
| 15                                                                                             | Provide published estimates in a file format from which data can be efficiently extracted.                                                                                                                                                                                                                                                                                                | <i>Appendix, table S1 page 28</i>                                                    |
| 16                                                                                             | Report a quantitative measure of the uncertainty of the estimates (e.g. uncertainty intervals).                                                                                                                                                                                                                                                                                           | <i>Results</i>                                                                       |
| 17                                                                                             | Interpret results in light of existing evidence. If updating a previous set of estimates, describe the reasons for changes in estimates.                                                                                                                                                                                                                                                  | <i>Discussion</i>                                                                    |
| 18                                                                                             | Discuss limitations of the estimates. Include a discussion of any modelling assumptions or data limitations that affect interpretation of the estimates.                                                                                                                                                                                                                                  | <i>Discussion</i>                                                                    |

## Section 3 Preferred Reporting Items for Systematic Reviews and Meta-Analyses (PRISMA) compliance

This study complies with PRISMA 2020 recommendations.<sup>2</sup> See table S3 below for the PRISMA 2020 checklist. The PRISMA recommendations can be found on the [PRISMA website](#).

### PRISMA 2020 checklist

| Section and topic             | Item # | Checklist item                                                                                                                                                                                                                                                                                       | Location where item is reported                                              |
|-------------------------------|--------|------------------------------------------------------------------------------------------------------------------------------------------------------------------------------------------------------------------------------------------------------------------------------------------------------|------------------------------------------------------------------------------|
| <b>TITLE</b>                  |        |                                                                                                                                                                                                                                                                                                      |                                                                              |
| Title                         | 1      | Identify the report as a systematic review.                                                                                                                                                                                                                                                          | Paper title                                                                  |
| <b>ABSTRACT</b>               |        |                                                                                                                                                                                                                                                                                                      |                                                                              |
| Abstract                      | 2      | See the PRISMA 2020 for Abstracts checklist.                                                                                                                                                                                                                                                         | N/A                                                                          |
| <b>INTRODUCTION</b>           |        |                                                                                                                                                                                                                                                                                                      |                                                                              |
| Rationale                     | 3      | Describe the rationale for the review in the context of existing knowledge.                                                                                                                                                                                                                          | Main text introduction, paragraph 3                                          |
| Objectives                    | 4      | Provide an explicit statement of the objective(s) or question(s) the review addresses.                                                                                                                                                                                                               | Final sentence of main text introduction                                     |
| <b>METHODS</b>                |        |                                                                                                                                                                                                                                                                                                      |                                                                              |
| Eligibility criteria          | 5      | Specify the inclusion and exclusion criteria for the review and how studies were grouped for the syntheses.                                                                                                                                                                                          | Main text methods "inclusion and exclusion criteria" section                 |
| Information sources           | 6      | Specify all databases, registers, websites, organisations, reference lists and other sources searched or consulted to identify studies. Specify the date when each source was last searched or consulted.                                                                                            | Main text methods "overview," paragraph 1                                    |
| Search strategy               | 7      | Present the full search strategies for all databases, registers and websites, including any filters and limits used.                                                                                                                                                                                 | Main text methods "overview," paragraph 1                                    |
| Selection process             | 8      | Specify the methods used to decide whether a study met the inclusion criteria of the review, including how many reviewers screened each record and each report retrieved, whether they worked independently, and if applicable, details of automation tools used in the process.                     | Main text methods "study selection and data extraction" section, paragraph 1 |
| Data collection process       | 9      | Specify the methods used to collect data from reports, including how many reviewers collected data from each report, whether they worked independently, any processes for obtaining or confirming data from study investigators, and if applicable, details of automation tools used in the process. | Main text methods "study selection and data extraction" section              |
| Data items                    | 10a    | List and define all outcomes for which data were sought. Specify whether all results that were compatible with each outcome domain in each study were sought (e.g. for all measures, time points, analyses), and if not, the methods used to decide which results to collect.                        | Main text methods "outcomes assessed" section                                |
|                               | 10b    | List and define all other variables for which data were sought (e.g. participant and intervention characteristics, funding sources). Describe any assumptions made about any missing or unclear information.                                                                                         | Main text methods "study selection and data extraction" section, paragraph 2 |
| Study risk of bias assessment | 11     | Specify the methods used to assess risk of bias in the included studies, including details of the tool(s) used, how many reviewers assessed each study and whether they worked independently, and if applicable, details of automation tools used in the process.                                    | Main text methods "risk of bias assessment" section                          |
| Effect measures               | 12     | Specify for each outcome the effect measure(s) (e.g. risk ratio, mean difference) used in the synthesis or presentation of results.                                                                                                                                                                  | Main text methods "data analysis" section                                    |

| Section and topic             | Item # | Checklist item                                                                                                                                                                                                                                                                       | Location where item is reported                                                                                                       |
|-------------------------------|--------|--------------------------------------------------------------------------------------------------------------------------------------------------------------------------------------------------------------------------------------------------------------------------------------|---------------------------------------------------------------------------------------------------------------------------------------|
| Synthesis methods             | 13a    | Describe the processes used to decide which studies were eligible for each synthesis (e.g. tabulating the study intervention characteristics and comparing against the planned groups for each synthesis (item #5)).                                                                 | N/A                                                                                                                                   |
|                               | 13b    | Describe any methods required to prepare the data for presentation or synthesis, such as handling of missing summary statistics, or data conversions.                                                                                                                                | N/A                                                                                                                                   |
|                               | 13c    | Describe any methods used to tabulate or visually display results of individual studies and syntheses.                                                                                                                                                                               | Main text methods "data analysis" section                                                                                             |
|                               | 13d    | Describe any methods used to synthesize results and provide a rationale for the choice(s). If meta-analysis was performed, describe the model(s), method(s) to identify the presence and extent of statistical heterogeneity, and software package(s) used.                          | Main text methods "data analysis" section                                                                                             |
|                               | 13e    | Describe any methods used to explore possible causes of heterogeneity among study results (e.g. subgroup analysis, meta-regression).                                                                                                                                                 | Main text methods "data analysis" section                                                                                             |
|                               | 13f    | Describe any sensitivity analyses conducted to assess robustness of the synthesized results.                                                                                                                                                                                         | Main text methods "data analysis" section                                                                                             |
| Reporting bias assessment     | 14     | Describe any methods used to assess risk of bias due to missing results in a synthesis (arising from reporting biases).                                                                                                                                                              | Main text methods "Risk of bias assessment" section                                                                                   |
| Certainty assessment          | 15     | Describe any methods used to assess certainty (or confidence) in the body of evidence for an outcome.                                                                                                                                                                                | Main text methods "data analysis" section                                                                                             |
| <b>RESULTS</b>                |        |                                                                                                                                                                                                                                                                                      |                                                                                                                                       |
| Study selection               | 16a    | Describe the results of the search and selection process, from the number of records identified in the search to the number of studies included in the review, ideally using a flow diagram.                                                                                         | Main text results, paragraphs 1 and 2                                                                                                 |
|                               | 16b    | Cite studies that might appear to meet the inclusion criteria, but which were excluded, and explain why they were excluded.                                                                                                                                                          | N/A                                                                                                                                   |
| Study characteristics         | 17     | Cite each included study and present its characteristics.                                                                                                                                                                                                                            | Appendix Table S1                                                                                                                     |
| Risk of bias in studies       | 18     | Present assessments of risk of bias for each included study.                                                                                                                                                                                                                         | Appendix tables S3 and S4                                                                                                             |
| Results of individual studies | 19     | For all outcomes, present, for each study: (a) summary statistics for each group (where appropriate) and (b) an effect estimate and its precision (e.g. confidence/credible interval), ideally using structured tables or plots.                                                     | Appendix table S1                                                                                                                     |
| Results of syntheses          | 20a    | For each synthesis, briefly summarise the characteristics and risk of bias among contributing studies.                                                                                                                                                                               | Main text results, paragraph 8                                                                                                        |
|                               | 20b    | Present results of all statistical syntheses conducted. If meta-analysis was done, present for each the summary estimate and its precision (e.g. confidence/credible interval) and measures of statistical heterogeneity. If comparing groups, describe the direction of the effect. | Main text results, paragraphs 3–7                                                                                                     |
|                               | 20c    | Present results of all investigations of possible causes of heterogeneity among study results.                                                                                                                                                                                       | NA                                                                                                                                    |
|                               | 20d    | Present results of all sensitivity analyses conducted to assess the robustness of the synthesized results.                                                                                                                                                                           | Main text results, paragraphs 9                                                                                                       |
| Reporting biases              | 21     | Present assessments of risk of bias due to missing results (arising from reporting biases) for each synthesis assessed.                                                                                                                                                              | NA                                                                                                                                    |
| Certainty of evidence         | 22     | Present assessments of certainty (or confidence) in the body of evidence for each outcome assessed.                                                                                                                                                                                  | 95% uncertainty intervals (UIs) are presented for all mean estimates in the main text results section and in all figures, as relevant |
| <b>DISCUSSION</b>             |        |                                                                                                                                                                                                                                                                                      |                                                                                                                                       |
| Discussion                    | 23a    | Provide a general interpretation of the results in the context of other evidence.                                                                                                                                                                                                    | Main text discussion,                                                                                                                 |

| Section and topic                              | Item # | Checklist item                                                                                                                                                                                                                             | Location where item is reported                                                         |
|------------------------------------------------|--------|--------------------------------------------------------------------------------------------------------------------------------------------------------------------------------------------------------------------------------------------|-----------------------------------------------------------------------------------------|
|                                                |        |                                                                                                                                                                                                                                            | particularly paragraph 3                                                                |
|                                                | 23b    | Discuss any limitations of the evidence included in the review.                                                                                                                                                                            | Main text discussion, paragraph 5                                                       |
|                                                | 23c    | Discuss any limitations of the review processes used.                                                                                                                                                                                      | Main text discussion, paragraph 5                                                       |
|                                                | 23d    | Discuss implications of the results for practice, policy, and future research.                                                                                                                                                             | Main text discussion, paragraph 4; conclusion                                           |
| <b>OTHER INFORMATION</b>                       |        |                                                                                                                                                                                                                                            |                                                                                         |
| Registration and protocol                      | 24a    | Provide registration information for the review, including register name and registration number, or state that the review was not registered.                                                                                             | Main text methods "overview," second paragraph                                          |
|                                                | 24b    | Indicate where the review protocol can be accessed, or state that a protocol was not prepared.                                                                                                                                             | Main text methods "overview," second paragraph                                          |
|                                                | 24c    | Describe and explain any amendments to information provided at registration or in the protocol.                                                                                                                                            | N/A                                                                                     |
| Support                                        | 25     | Describe sources of financial or non-financial support for the review, and the role of the funders or sponsors in the review.                                                                                                              | Main text methods "role of the funding source" section, acknowledgments section         |
| Competing interests                            | 26     | Declare any competing interests of review authors.                                                                                                                                                                                         | Main text declaration of interests section                                              |
| Availability of data, code and other materials | 27     | Report which of the following are publicly available and where they can be found: template data collection forms; data extracted from included studies; data used for all analyses; analytic code; any other materials used in the review. | Main text data sharing section, methods "overview," second paragraph; Appendix table S1 |



## Section 4    Supplementary figures and tables

**Figure S1 Forest plots of meta-analysis results by variant and outcome**

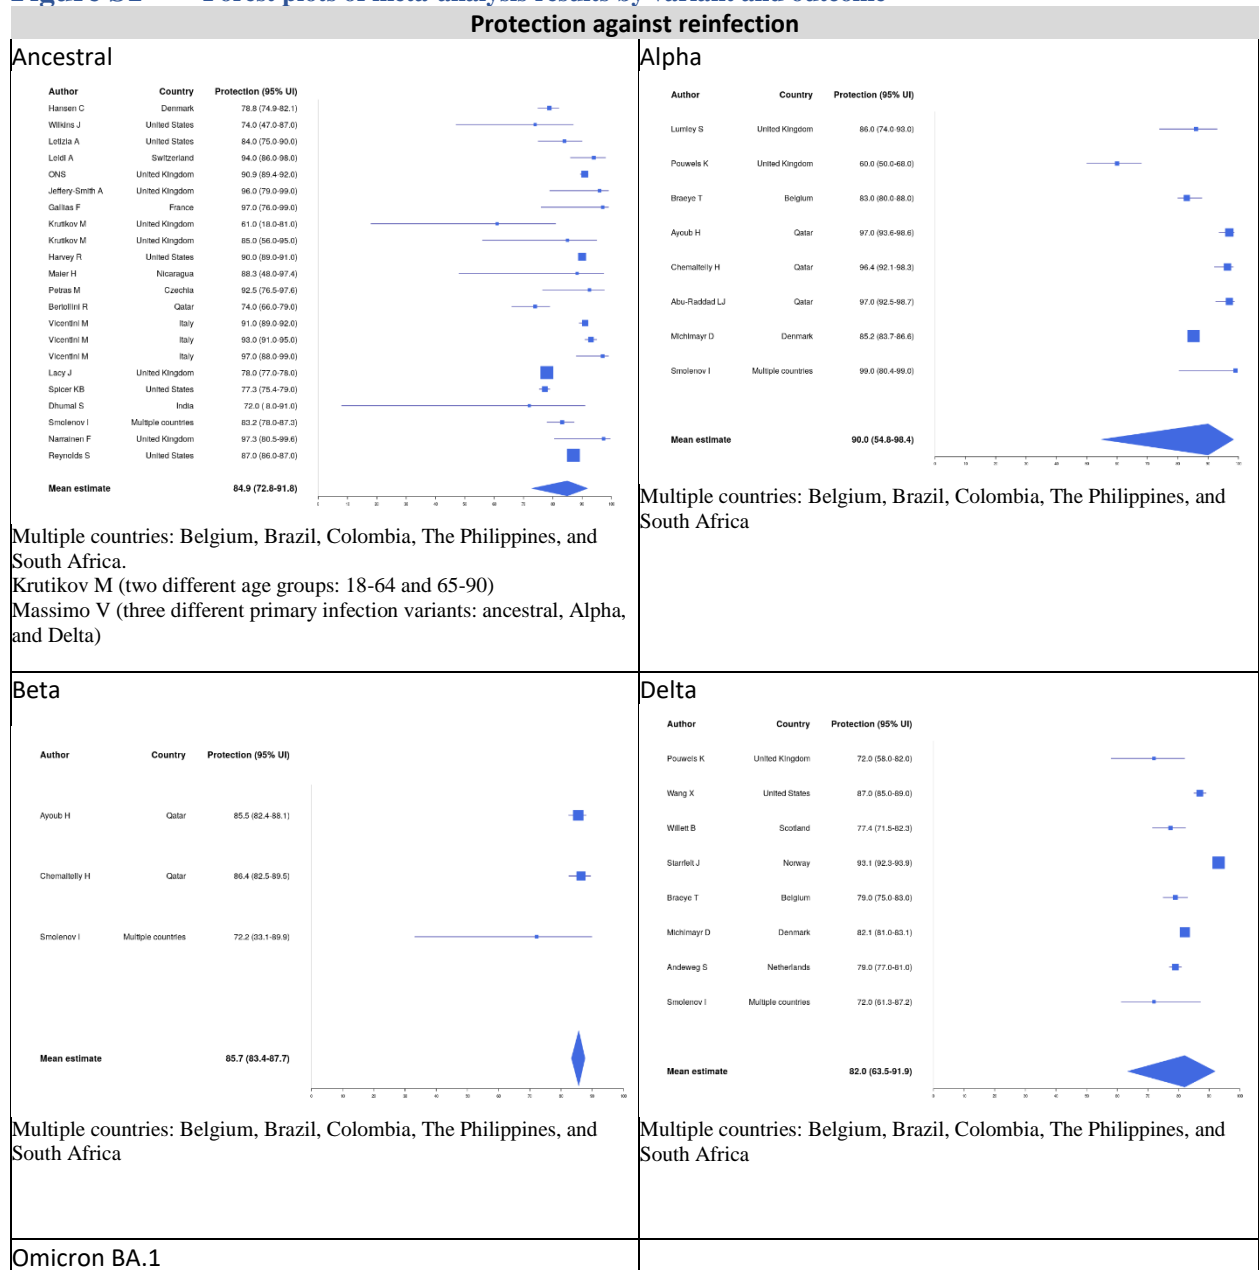

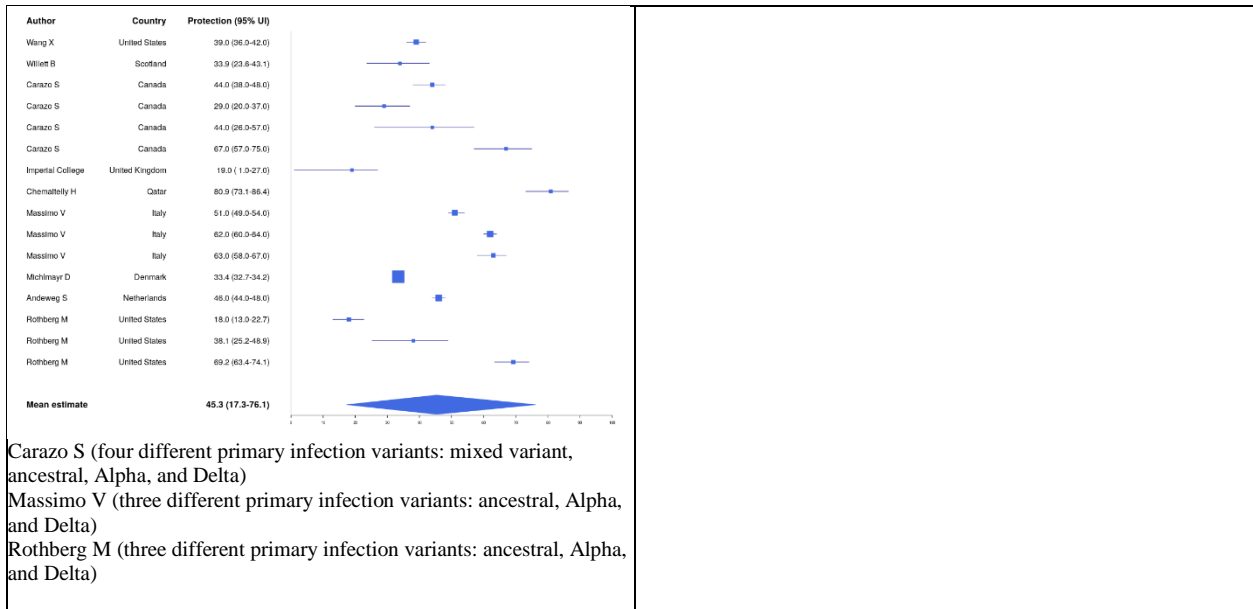

**Protection against symptomatic disease**

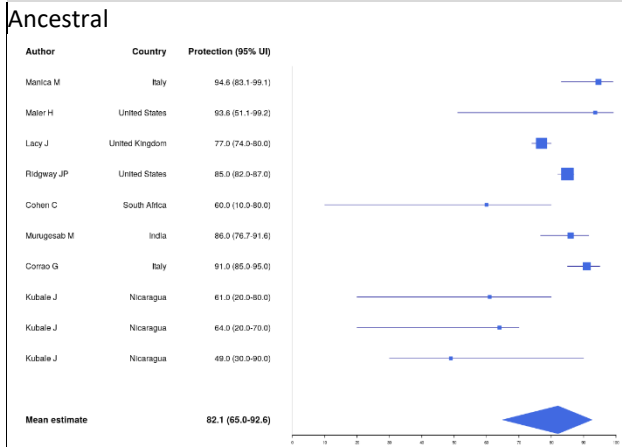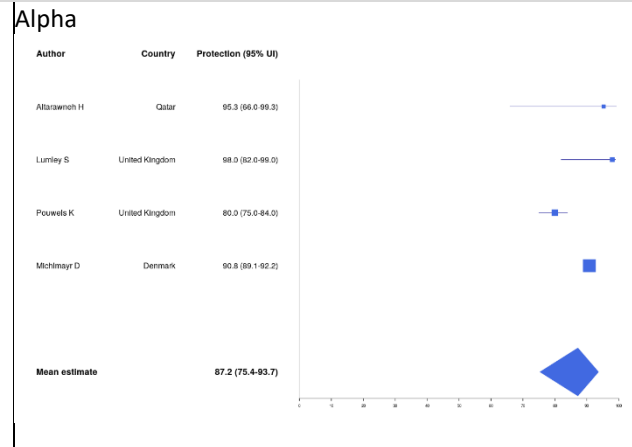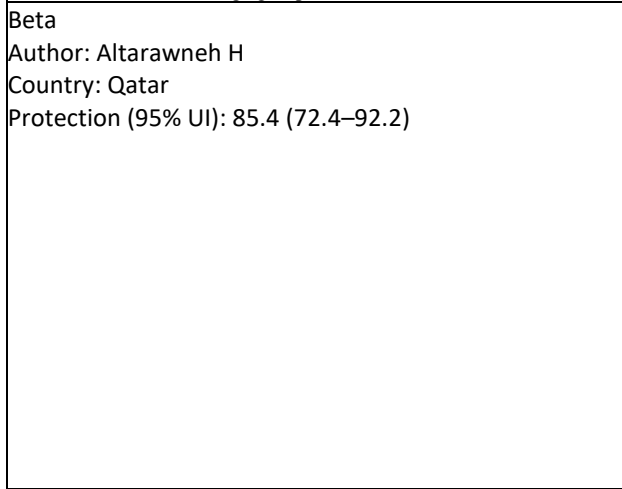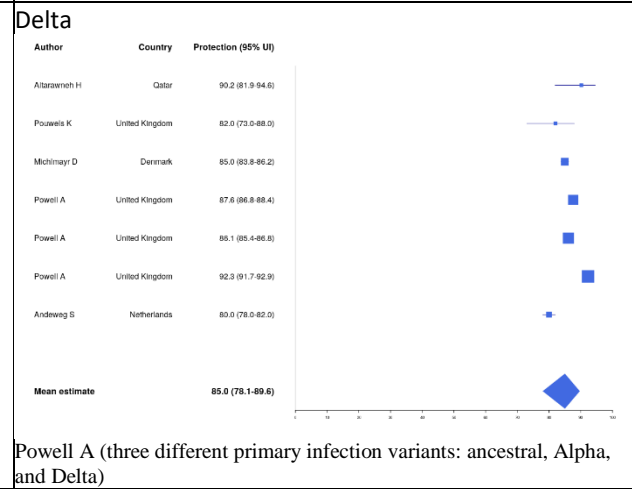

Omicron BA.1

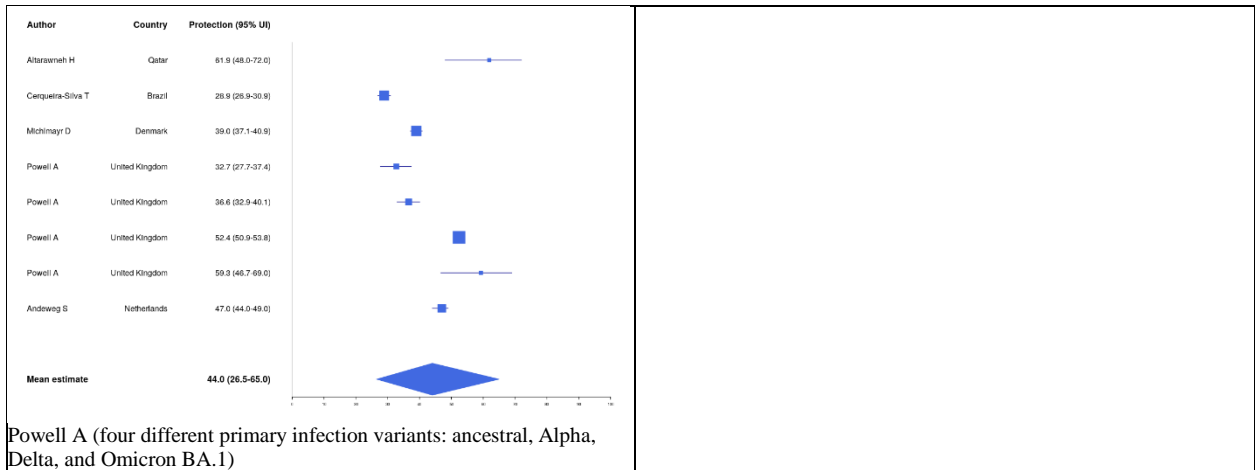

**Protection against severe disease**

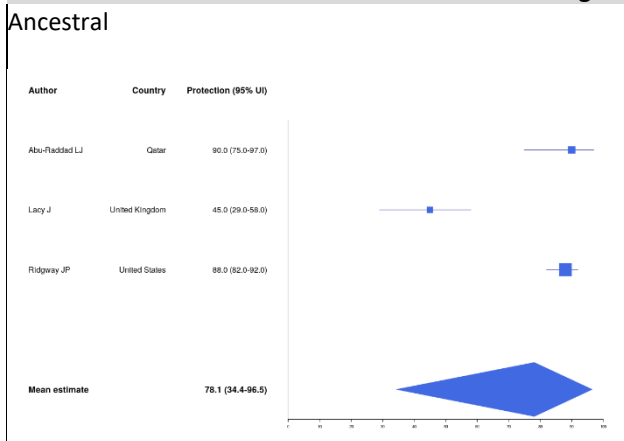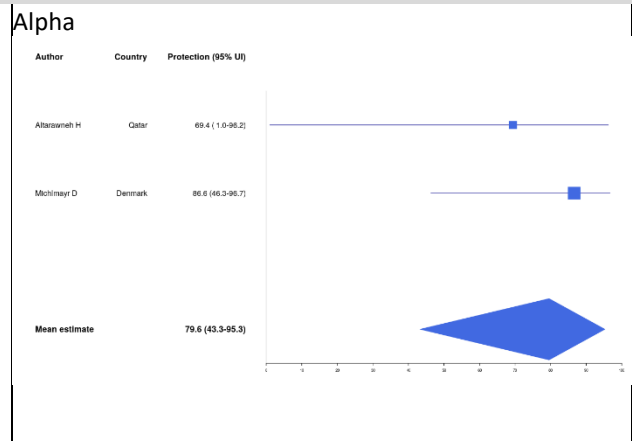

### Beta

Author: Altarawneh H  
 Country: Qatar  
 Protection (95% UI): 88.0 (50.7-97.1)

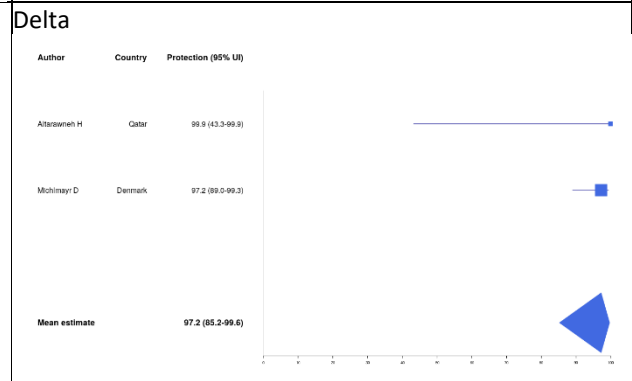

### Omicron BA.1

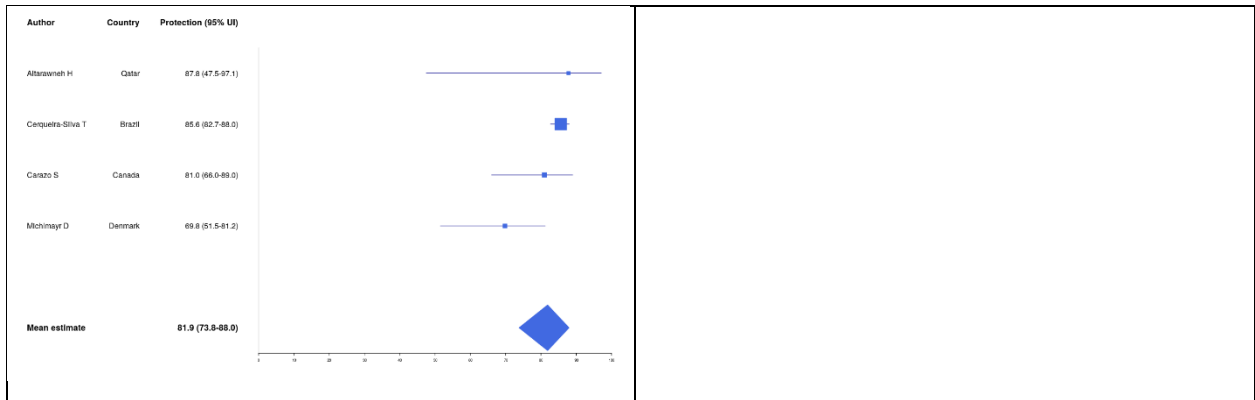

**Figure S2 Sensitivity analysis according to Risk of Bias assessment**

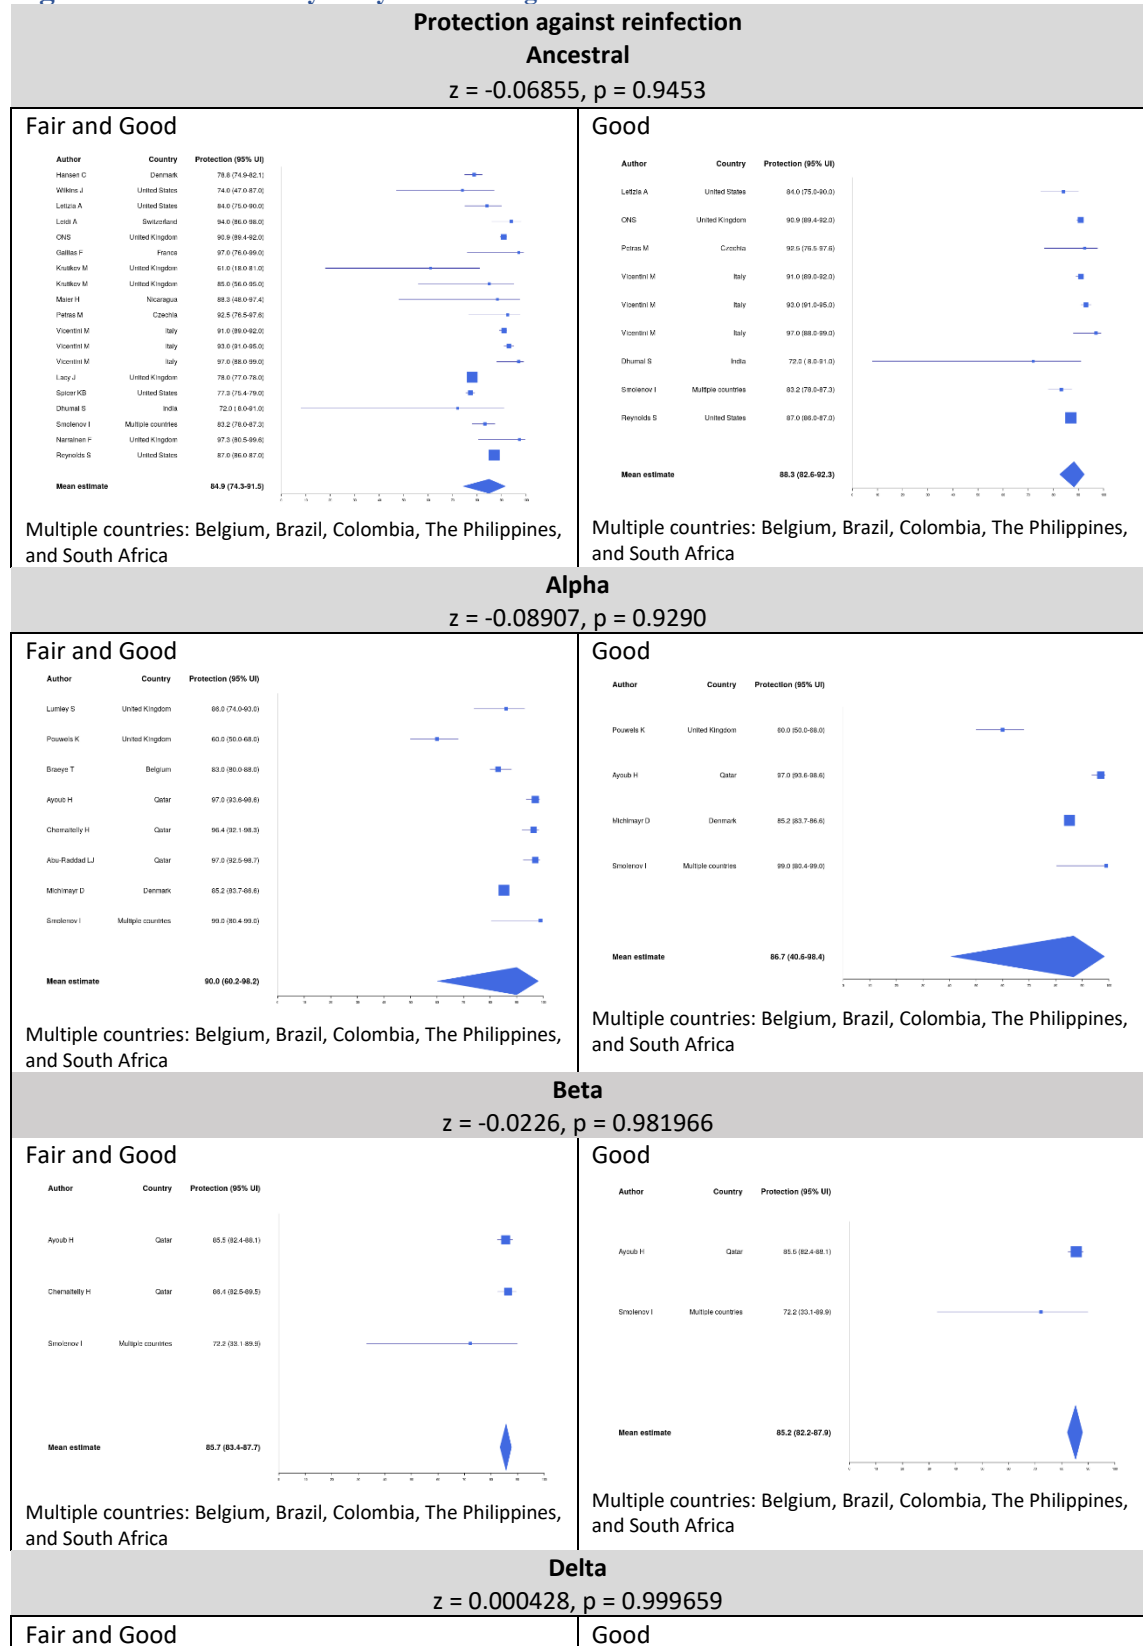

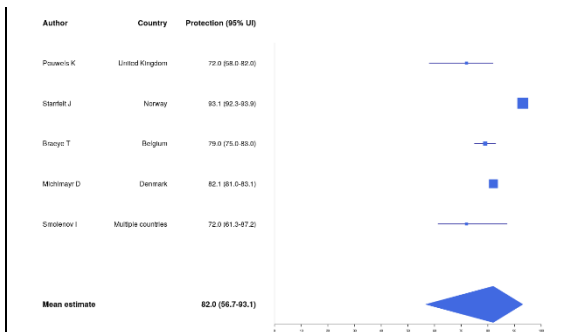

Multiple countries: Belgium, Brazil, Colombia, The Philippines, and South Africa

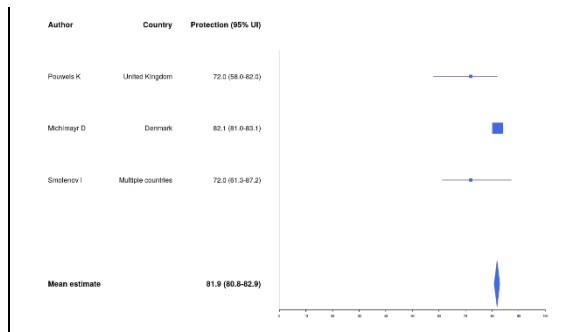

Multiple countries: Belgium, Brazil, Colombia, The Philippines, and South Africa

**Omicron BA.1**  
z = 0.165204, p = 0.868783

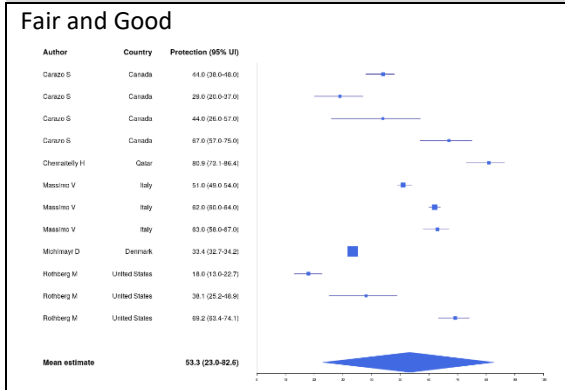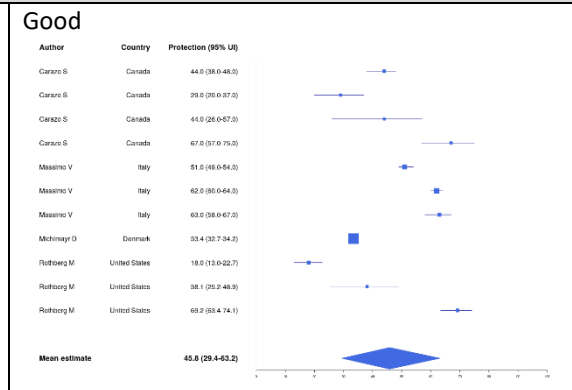

**Protection against symptomatic disease**  
**Ancestral**  
z = -0.39889, p = 0.689973

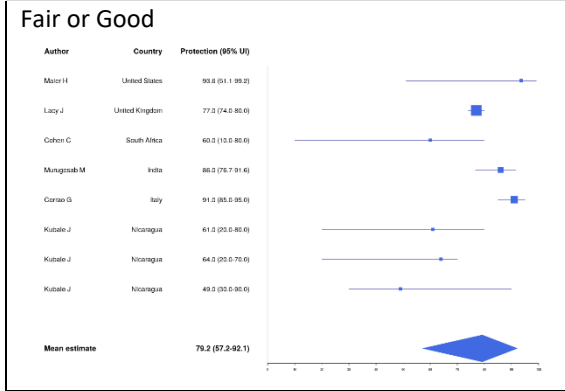

**Good**  
Author: Cohen C  
Country: South Africa  
Protection (95% UI): 60.0 (10.0-80.0)

**Alpha**  
z = -0.20574, p = 0.836995

Fair and Good

Good

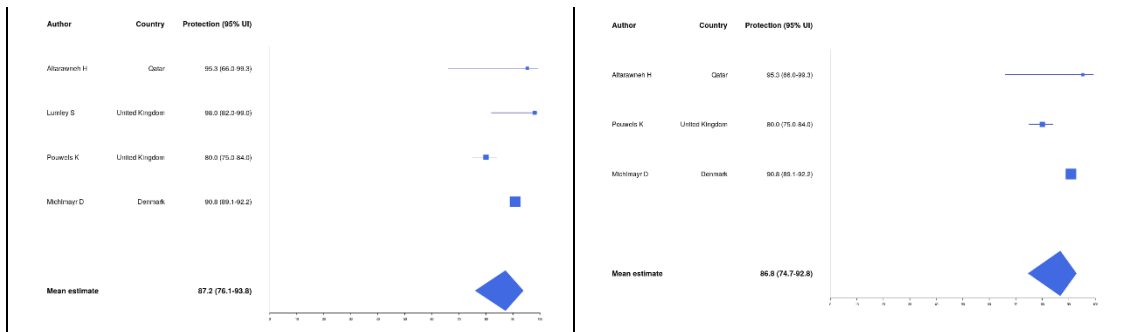

**Beta**

Good  
 Author: Altarawneh H  
 Country: Qatar  
 Protection (95% UI): 85.4 (72.4–92.2)

**Delta**

$z = 0.089078$ ,  $p = 0.92902$

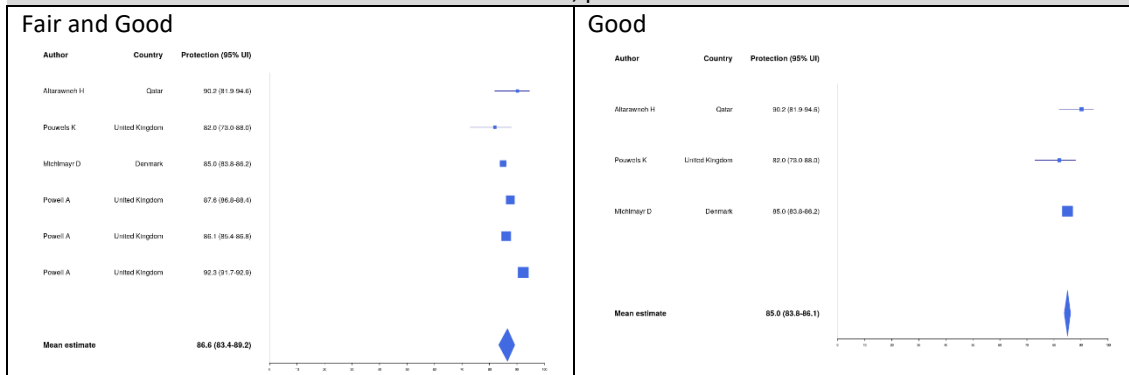

**Fair and Good**

**Good**

**Omicron BA.1**

$z = -0.51998$ ,  $p = 0.603079$

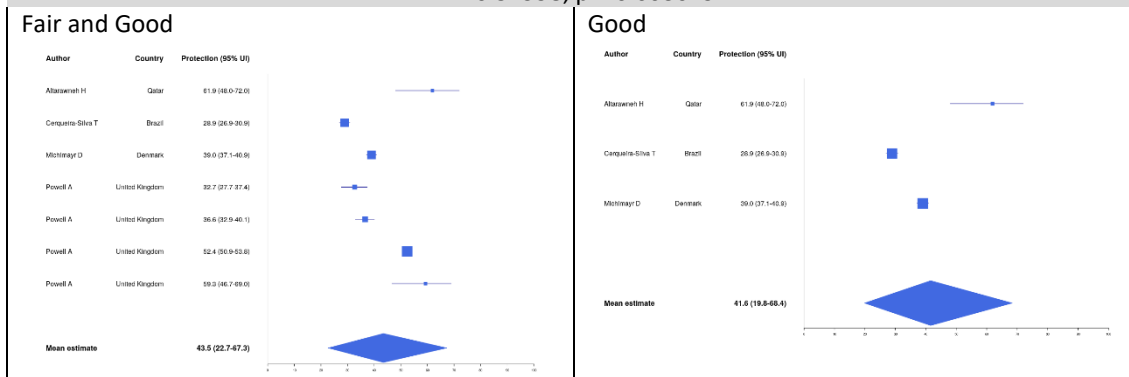

**Fair and Good**

**Good**

**Protection against severe disease  
Ancestral**

Fair



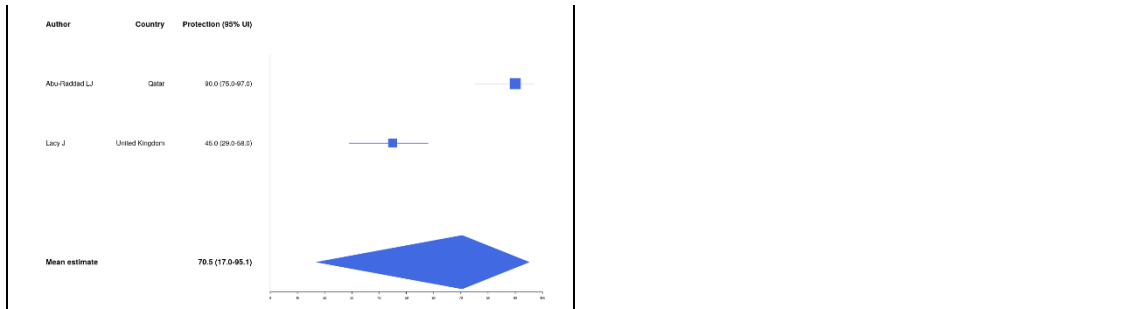

### Alpha

Good

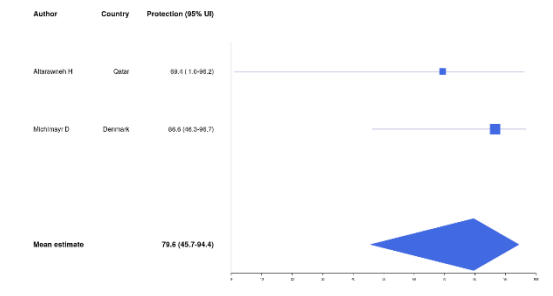

### Beta

Good

Author: Altarawneh H  
 Country: Qatar  
 Protection (95% UI): 88.0 (50.7–97.1)

### Delta

Good

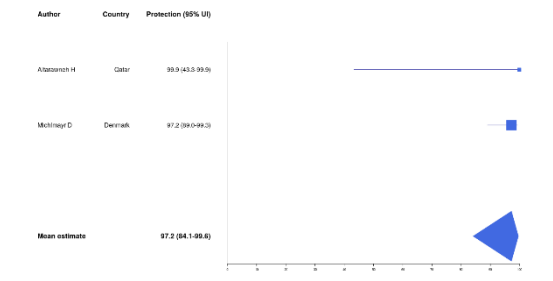

### Omicron BA.1

Good

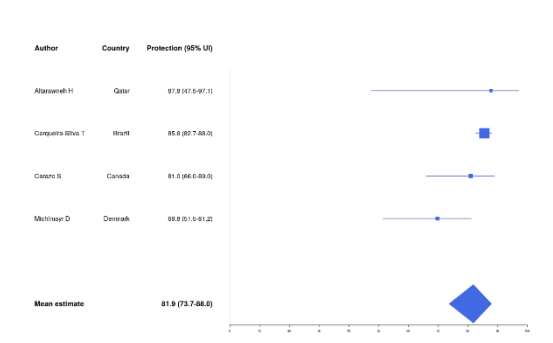



**Figure S3** Sensitivity analysis according to adjusted/unadjusted results

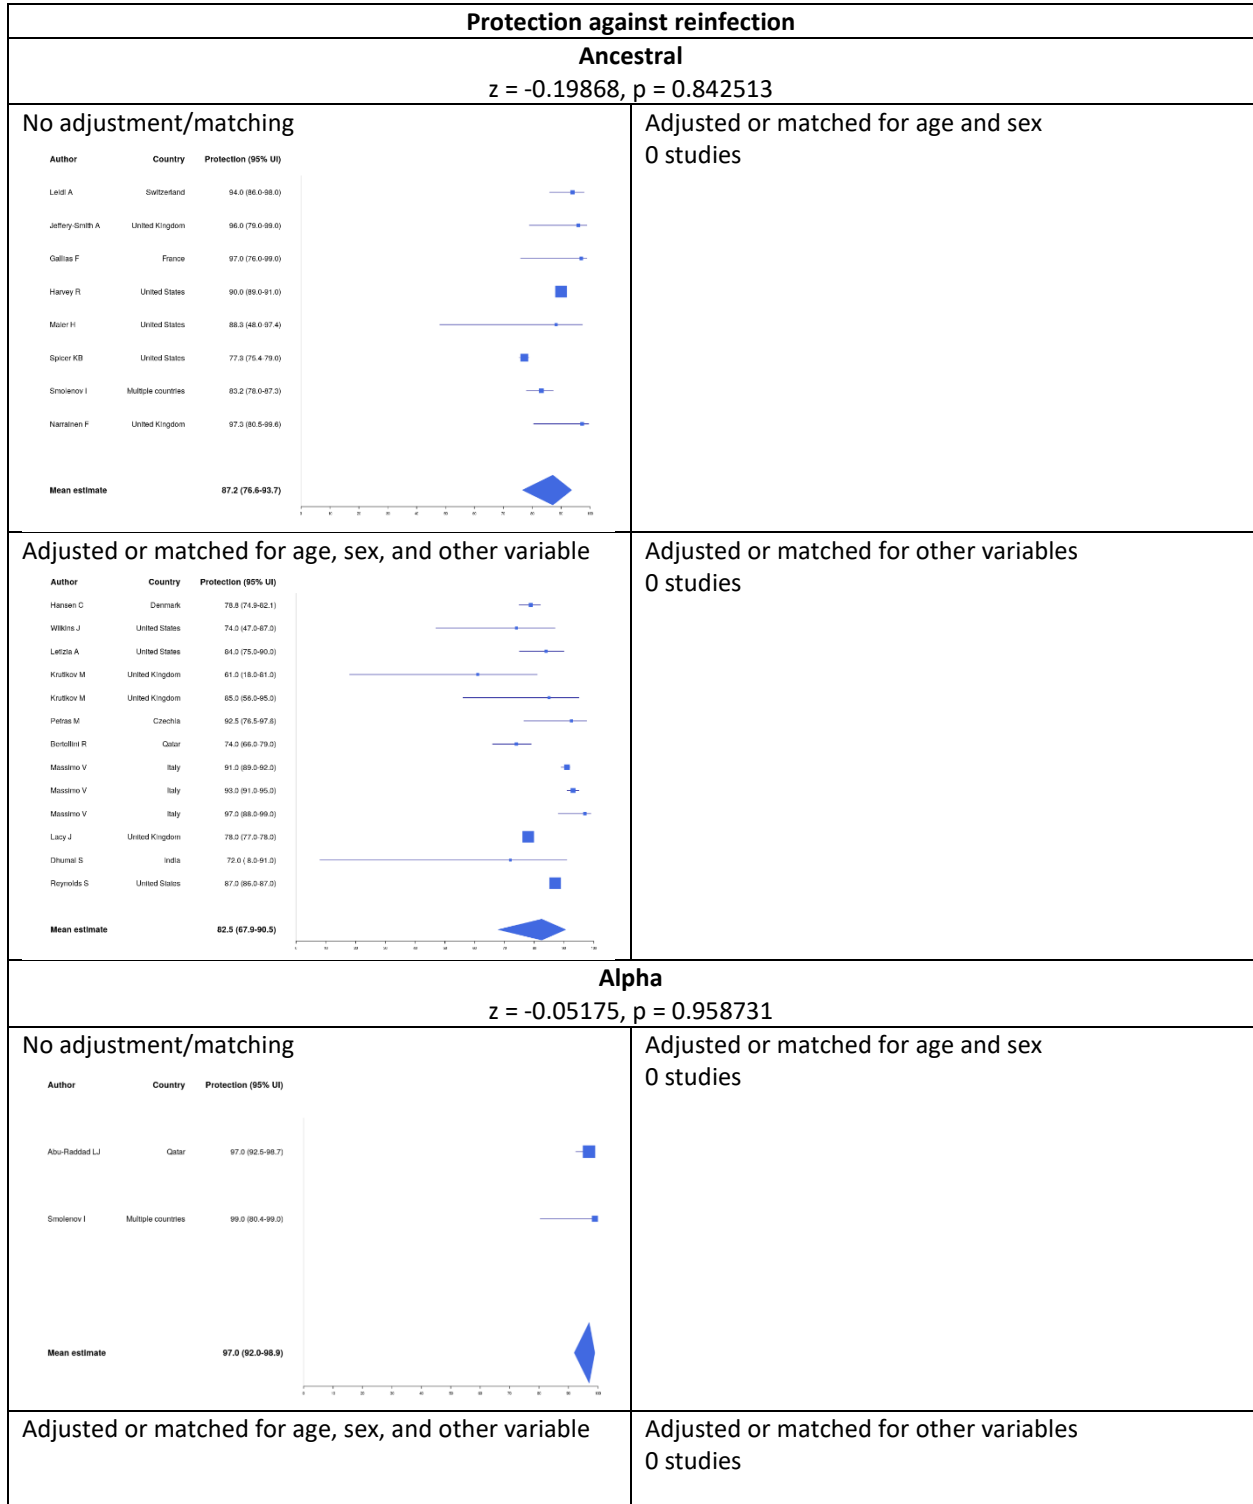

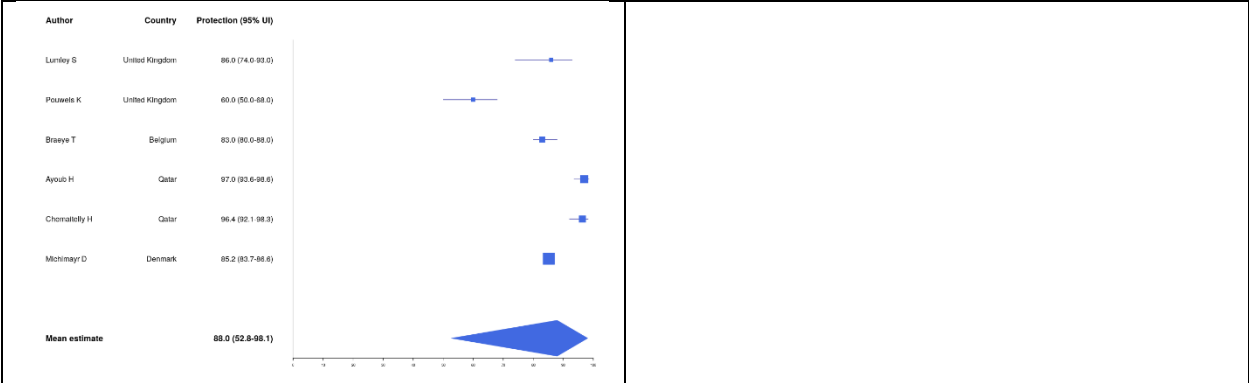

**Beta**

$z = -0.06747, p = 0.946209$

No adjustment/matching  
 Author: Smolenov I  
 Country: Multiple countries: Belgium, Brazil, Colombia, The Philippines, and South Africa  
 Protection (95% UI): 72.2 (33.1–89.9)

Adjusted or matched for age and sex  
 0 studies

Adjusted or matched for age, sex, and other variable

Adjusted or matched for other variables  
 0 studies

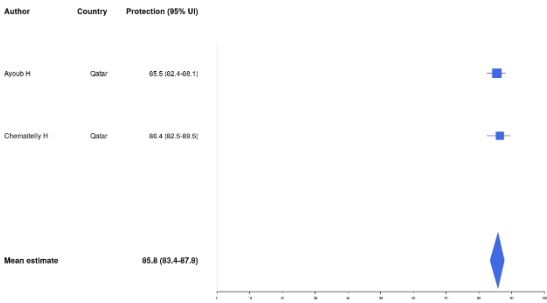

**Delta**

$z = 0.080889, p = 0.93553$

No adjustment/matching

Adjusted or matched for age and sex  
 0 studies

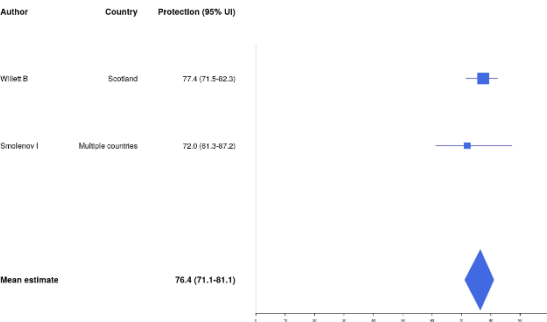

Adjusted or matched for age, sex, and other variable

Adjusted or matched for other variables  
 0 studies

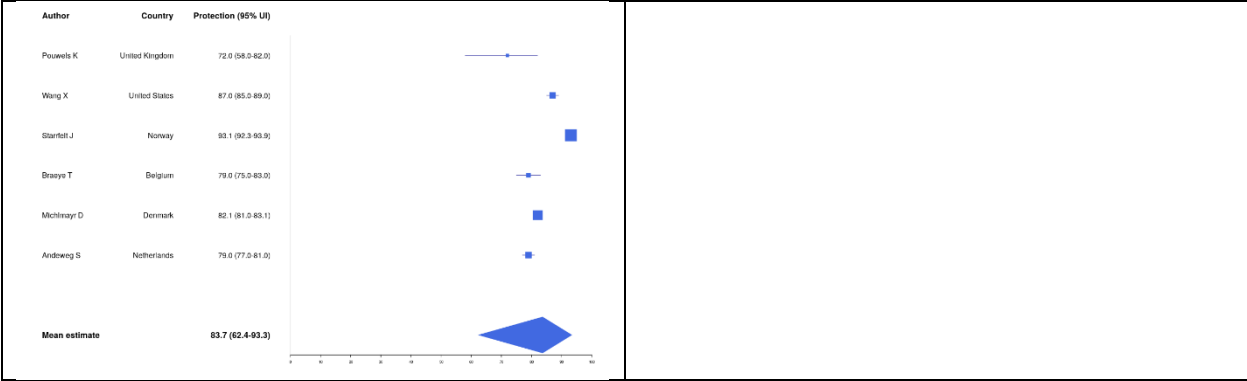

**Omicron BA.1**  
 $z = 0.464388, p = 0.64237$

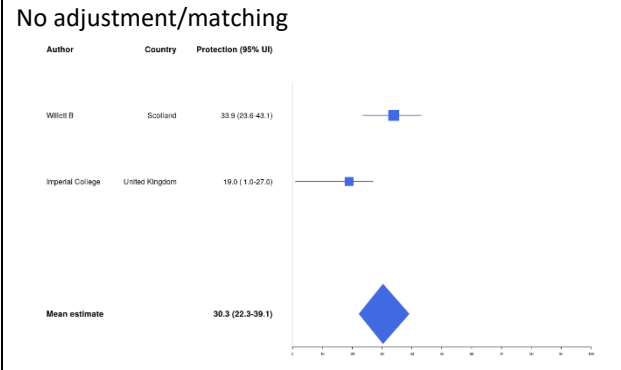

**Adjusted or matched for age and sex**  
 0 studies

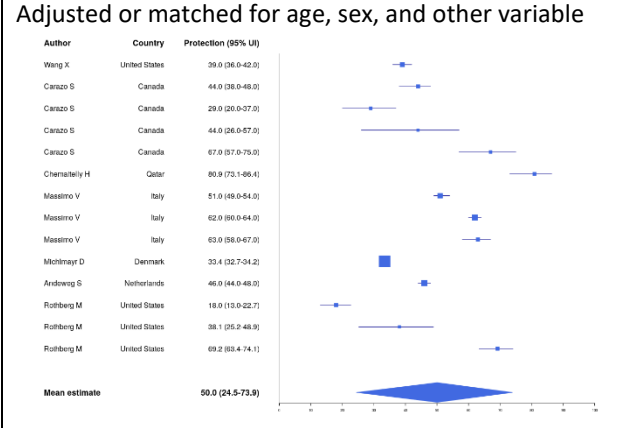

**Adjusted or matched for other variables**  
 0 studies

**Protection against symptomatic disease**

**Ancestral**  
 $z = -0.39446, p = 0.693244$

**No adjustment/matching**

**Adjusted or matched for age and sex**  
 0 studies

| <table border="1"> <thead> <tr> <th>Author</th> <th>Country</th> <th>Protection (95% UI)</th> </tr> </thead> <tbody> <tr> <td>Meier H</td> <td>United States</td> <td>93.6 (51.1-99.2)</td> </tr> <tr> <td>Kubacki J</td> <td>Nicaragua</td> <td>61.0 (26.0-80.5)</td> </tr> <tr> <td>Kubacki J</td> <td>Nicaragua</td> <td>64.0 (26.0-79.5)</td> </tr> <tr> <td>Kubacki J</td> <td>Nicaragua</td> <td>49.0 (30.0-90.5)</td> </tr> <tr> <td><b>Mean estimate</b></td> <td></td> <td><b>60.0 (43.7-72.7)</b></td> </tr> </tbody> </table> 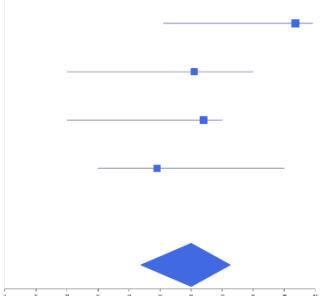                                                                          | Author                                                       | Country                 | Protection (95% UI) | Meier H      | United States | 93.6 (51.1-99.2) | Kubacki J | Nicaragua      | 61.0 (26.0-80.5) | Kubacki J  | Nicaragua      | 64.0 (26.0-79.5) | Kubacki J   | Nicaragua | 49.0 (30.0-90.5) | <b>Mean estimate</b> |  | <b>60.0 (43.7-72.7)</b> |                                                                                                                                                                                                                                                                                                                                                                                                                                                                                                                        |        |         |                     |         |              |                  |          |       |                  |                      |  |                         |
|-----------------------------------------------------------------------------------------------------------------------------------------------------------------------------------------------------------------------------------------------------------------------------------------------------------------------------------------------------------------------------------------------------------------------------------------------------------------------------------------------------------------------------------------------------------------------------------------------------------------------------------------------------------------------------------------------------|--------------------------------------------------------------|-------------------------|---------------------|--------------|---------------|------------------|-----------|----------------|------------------|------------|----------------|------------------|-------------|-----------|------------------|----------------------|--|-------------------------|------------------------------------------------------------------------------------------------------------------------------------------------------------------------------------------------------------------------------------------------------------------------------------------------------------------------------------------------------------------------------------------------------------------------------------------------------------------------------------------------------------------------|--------|---------|---------------------|---------|--------------|------------------|----------|-------|------------------|----------------------|--|-------------------------|
| Author                                                                                                                                                                                                                                                                                                                                                                                                                                                                                                                                                                                                                                                                                              | Country                                                      | Protection (95% UI)     |                     |              |               |                  |           |                |                  |            |                |                  |             |           |                  |                      |  |                         |                                                                                                                                                                                                                                                                                                                                                                                                                                                                                                                        |        |         |                     |         |              |                  |          |       |                  |                      |  |                         |
| Meier H                                                                                                                                                                                                                                                                                                                                                                                                                                                                                                                                                                                                                                                                                             | United States                                                | 93.6 (51.1-99.2)        |                     |              |               |                  |           |                |                  |            |                |                  |             |           |                  |                      |  |                         |                                                                                                                                                                                                                                                                                                                                                                                                                                                                                                                        |        |         |                     |         |              |                  |          |       |                  |                      |  |                         |
| Kubacki J                                                                                                                                                                                                                                                                                                                                                                                                                                                                                                                                                                                                                                                                                           | Nicaragua                                                    | 61.0 (26.0-80.5)        |                     |              |               |                  |           |                |                  |            |                |                  |             |           |                  |                      |  |                         |                                                                                                                                                                                                                                                                                                                                                                                                                                                                                                                        |        |         |                     |         |              |                  |          |       |                  |                      |  |                         |
| Kubacki J                                                                                                                                                                                                                                                                                                                                                                                                                                                                                                                                                                                                                                                                                           | Nicaragua                                                    | 64.0 (26.0-79.5)        |                     |              |               |                  |           |                |                  |            |                |                  |             |           |                  |                      |  |                         |                                                                                                                                                                                                                                                                                                                                                                                                                                                                                                                        |        |         |                     |         |              |                  |          |       |                  |                      |  |                         |
| Kubacki J                                                                                                                                                                                                                                                                                                                                                                                                                                                                                                                                                                                                                                                                                           | Nicaragua                                                    | 49.0 (30.0-90.5)        |                     |              |               |                  |           |                |                  |            |                |                  |             |           |                  |                      |  |                         |                                                                                                                                                                                                                                                                                                                                                                                                                                                                                                                        |        |         |                     |         |              |                  |          |       |                  |                      |  |                         |
| <b>Mean estimate</b>                                                                                                                                                                                                                                                                                                                                                                                                                                                                                                                                                                                                                                                                                |                                                              | <b>60.0 (43.7-72.7)</b> |                     |              |               |                  |           |                |                  |            |                |                  |             |           |                  |                      |  |                         |                                                                                                                                                                                                                                                                                                                                                                                                                                                                                                                        |        |         |                     |         |              |                  |          |       |                  |                      |  |                         |
| <p><b>Adjusted or matched for age, sex, and other variable</b></p> <table border="1"> <thead> <tr> <th>Author</th> <th>Country</th> <th>Protection (95% UI)</th> </tr> </thead> <tbody> <tr> <td>Manica M</td> <td>Italy</td> <td>94.6 (83.1-99.1)</td> </tr> <tr> <td>Lacey J</td> <td>United Kingdom</td> <td>77.0 (74.0-80.0)</td> </tr> <tr> <td>Ridgway JP</td> <td>United States</td> <td>85.0 (82.0-87.0)</td> </tr> <tr> <td>Murugesab M</td> <td>India</td> <td>86.0 (76.7-91.6)</td> </tr> <tr> <td><b>Mean estimate</b></td> <td></td> <td><b>83.1 (76.0-88.7)</b></td> </tr> </tbody> </table>         | Author                                                       | Country                 | Protection (95% UI) | Manica M     | Italy         | 94.6 (83.1-99.1) | Lacey J   | United Kingdom | 77.0 (74.0-80.0) | Ridgway JP | United States  | 85.0 (82.0-87.0) | Murugesab M | India     | 86.0 (76.7-91.6) | <b>Mean estimate</b> |  | <b>83.1 (76.0-88.7)</b> | <p><b>Adjusted or matched for other variables</b></p> <table border="1"> <thead> <tr> <th>Author</th> <th>Country</th> <th>Protection (95% UI)</th> </tr> </thead> <tbody> <tr> <td>Cohen C</td> <td>South Africa</td> <td>60.0 (10.0-86.0)</td> </tr> <tr> <td>Corneo G</td> <td>Italy</td> <td>91.0 (85.0-95.0)</td> </tr> <tr> <td><b>Mean estimate</b></td> <td></td> <td><b>83.4 (53.8-95.9)</b></td> </tr> </tbody> </table>  | Author | Country | Protection (95% UI) | Cohen C | South Africa | 60.0 (10.0-86.0) | Corneo G | Italy | 91.0 (85.0-95.0) | <b>Mean estimate</b> |  | <b>83.4 (53.8-95.9)</b> |
| Author                                                                                                                                                                                                                                                                                                                                                                                                                                                                                                                                                                                                                                                                                              | Country                                                      | Protection (95% UI)     |                     |              |               |                  |           |                |                  |            |                |                  |             |           |                  |                      |  |                         |                                                                                                                                                                                                                                                                                                                                                                                                                                                                                                                        |        |         |                     |         |              |                  |          |       |                  |                      |  |                         |
| Manica M                                                                                                                                                                                                                                                                                                                                                                                                                                                                                                                                                                                                                                                                                            | Italy                                                        | 94.6 (83.1-99.1)        |                     |              |               |                  |           |                |                  |            |                |                  |             |           |                  |                      |  |                         |                                                                                                                                                                                                                                                                                                                                                                                                                                                                                                                        |        |         |                     |         |              |                  |          |       |                  |                      |  |                         |
| Lacey J                                                                                                                                                                                                                                                                                                                                                                                                                                                                                                                                                                                                                                                                                             | United Kingdom                                               | 77.0 (74.0-80.0)        |                     |              |               |                  |           |                |                  |            |                |                  |             |           |                  |                      |  |                         |                                                                                                                                                                                                                                                                                                                                                                                                                                                                                                                        |        |         |                     |         |              |                  |          |       |                  |                      |  |                         |
| Ridgway JP                                                                                                                                                                                                                                                                                                                                                                                                                                                                                                                                                                                                                                                                                          | United States                                                | 85.0 (82.0-87.0)        |                     |              |               |                  |           |                |                  |            |                |                  |             |           |                  |                      |  |                         |                                                                                                                                                                                                                                                                                                                                                                                                                                                                                                                        |        |         |                     |         |              |                  |          |       |                  |                      |  |                         |
| Murugesab M                                                                                                                                                                                                                                                                                                                                                                                                                                                                                                                                                                                                                                                                                         | India                                                        | 86.0 (76.7-91.6)        |                     |              |               |                  |           |                |                  |            |                |                  |             |           |                  |                      |  |                         |                                                                                                                                                                                                                                                                                                                                                                                                                                                                                                                        |        |         |                     |         |              |                  |          |       |                  |                      |  |                         |
| <b>Mean estimate</b>                                                                                                                                                                                                                                                                                                                                                                                                                                                                                                                                                                                                                                                                                |                                                              | <b>83.1 (76.0-88.7)</b> |                     |              |               |                  |           |                |                  |            |                |                  |             |           |                  |                      |  |                         |                                                                                                                                                                                                                                                                                                                                                                                                                                                                                                                        |        |         |                     |         |              |                  |          |       |                  |                      |  |                         |
| Author                                                                                                                                                                                                                                                                                                                                                                                                                                                                                                                                                                                                                                                                                              | Country                                                      | Protection (95% UI)     |                     |              |               |                  |           |                |                  |            |                |                  |             |           |                  |                      |  |                         |                                                                                                                                                                                                                                                                                                                                                                                                                                                                                                                        |        |         |                     |         |              |                  |          |       |                  |                      |  |                         |
| Cohen C                                                                                                                                                                                                                                                                                                                                                                                                                                                                                                                                                                                                                                                                                             | South Africa                                                 | 60.0 (10.0-86.0)        |                     |              |               |                  |           |                |                  |            |                |                  |             |           |                  |                      |  |                         |                                                                                                                                                                                                                                                                                                                                                                                                                                                                                                                        |        |         |                     |         |              |                  |          |       |                  |                      |  |                         |
| Corneo G                                                                                                                                                                                                                                                                                                                                                                                                                                                                                                                                                                                                                                                                                            | Italy                                                        | 91.0 (85.0-95.0)        |                     |              |               |                  |           |                |                  |            |                |                  |             |           |                  |                      |  |                         |                                                                                                                                                                                                                                                                                                                                                                                                                                                                                                                        |        |         |                     |         |              |                  |          |       |                  |                      |  |                         |
| <b>Mean estimate</b>                                                                                                                                                                                                                                                                                                                                                                                                                                                                                                                                                                                                                                                                                |                                                              | <b>83.4 (53.8-95.9)</b> |                     |              |               |                  |           |                |                  |            |                |                  |             |           |                  |                      |  |                         |                                                                                                                                                                                                                                                                                                                                                                                                                                                                                                                        |        |         |                     |         |              |                  |          |       |                  |                      |  |                         |
| <b>Alpha</b>                                                                                                                                                                                                                                                                                                                                                                                                                                                                                                                                                                                                                                                                                        |                                                              |                         |                     |              |               |                  |           |                |                  |            |                |                  |             |           |                  |                      |  |                         |                                                                                                                                                                                                                                                                                                                                                                                                                                                                                                                        |        |         |                     |         |              |                  |          |       |                  |                      |  |                         |
| <p>No adjustment/matching<br/>0 studies</p>                                                                                                                                                                                                                                                                                                                                                                                                                                                                                                                                                                                                                                                         | <p>Adjusted or matched for age and sex<br/>0 studies</p>     |                         |                     |              |               |                  |           |                |                  |            |                |                  |             |           |                  |                      |  |                         |                                                                                                                                                                                                                                                                                                                                                                                                                                                                                                                        |        |         |                     |         |              |                  |          |       |                  |                      |  |                         |
| <p><b>Adjusted or matched for age, sex, and other variable</b></p> <table border="1"> <thead> <tr> <th>Author</th> <th>Country</th> <th>Protection (95% UI)</th> </tr> </thead> <tbody> <tr> <td>Altarawneh H</td> <td>Qatar</td> <td>95.3 (86.0-99.3)</td> </tr> <tr> <td>Lumley S</td> <td>United Kingdom</td> <td>96.0 (82.0-99.0)</td> </tr> <tr> <td>Pouwels K</td> <td>United Kingdom</td> <td>80.0 (75.0-84.0)</td> </tr> <tr> <td>Mohrway D</td> <td>Denmark</td> <td>90.8 (89.1-92.2)</td> </tr> <tr> <td><b>Mean estimate</b></td> <td></td> <td><b>87.2 (76.4-94.0)</b></td> </tr> </tbody> </table>  | Author                                                       | Country                 | Protection (95% UI) | Altarawneh H | Qatar         | 95.3 (86.0-99.3) | Lumley S  | United Kingdom | 96.0 (82.0-99.0) | Pouwels K  | United Kingdom | 80.0 (75.0-84.0) | Mohrway D   | Denmark   | 90.8 (89.1-92.2) | <b>Mean estimate</b> |  | <b>87.2 (76.4-94.0)</b> | <p>Adjusted or matched for other variables<br/>0 studies</p>                                                                                                                                                                                                                                                                                                                                                                                                                                                           |        |         |                     |         |              |                  |          |       |                  |                      |  |                         |
| Author                                                                                                                                                                                                                                                                                                                                                                                                                                                                                                                                                                                                                                                                                              | Country                                                      | Protection (95% UI)     |                     |              |               |                  |           |                |                  |            |                |                  |             |           |                  |                      |  |                         |                                                                                                                                                                                                                                                                                                                                                                                                                                                                                                                        |        |         |                     |         |              |                  |          |       |                  |                      |  |                         |
| Altarawneh H                                                                                                                                                                                                                                                                                                                                                                                                                                                                                                                                                                                                                                                                                        | Qatar                                                        | 95.3 (86.0-99.3)        |                     |              |               |                  |           |                |                  |            |                |                  |             |           |                  |                      |  |                         |                                                                                                                                                                                                                                                                                                                                                                                                                                                                                                                        |        |         |                     |         |              |                  |          |       |                  |                      |  |                         |
| Lumley S                                                                                                                                                                                                                                                                                                                                                                                                                                                                                                                                                                                                                                                                                            | United Kingdom                                               | 96.0 (82.0-99.0)        |                     |              |               |                  |           |                |                  |            |                |                  |             |           |                  |                      |  |                         |                                                                                                                                                                                                                                                                                                                                                                                                                                                                                                                        |        |         |                     |         |              |                  |          |       |                  |                      |  |                         |
| Pouwels K                                                                                                                                                                                                                                                                                                                                                                                                                                                                                                                                                                                                                                                                                           | United Kingdom                                               | 80.0 (75.0-84.0)        |                     |              |               |                  |           |                |                  |            |                |                  |             |           |                  |                      |  |                         |                                                                                                                                                                                                                                                                                                                                                                                                                                                                                                                        |        |         |                     |         |              |                  |          |       |                  |                      |  |                         |
| Mohrway D                                                                                                                                                                                                                                                                                                                                                                                                                                                                                                                                                                                                                                                                                           | Denmark                                                      | 90.8 (89.1-92.2)        |                     |              |               |                  |           |                |                  |            |                |                  |             |           |                  |                      |  |                         |                                                                                                                                                                                                                                                                                                                                                                                                                                                                                                                        |        |         |                     |         |              |                  |          |       |                  |                      |  |                         |
| <b>Mean estimate</b>                                                                                                                                                                                                                                                                                                                                                                                                                                                                                                                                                                                                                                                                                |                                                              | <b>87.2 (76.4-94.0)</b> |                     |              |               |                  |           |                |                  |            |                |                  |             |           |                  |                      |  |                         |                                                                                                                                                                                                                                                                                                                                                                                                                                                                                                                        |        |         |                     |         |              |                  |          |       |                  |                      |  |                         |
| <b>Beta</b>                                                                                                                                                                                                                                                                                                                                                                                                                                                                                                                                                                                                                                                                                         |                                                              |                         |                     |              |               |                  |           |                |                  |            |                |                  |             |           |                  |                      |  |                         |                                                                                                                                                                                                                                                                                                                                                                                                                                                                                                                        |        |         |                     |         |              |                  |          |       |                  |                      |  |                         |
| <p>No adjustment/matching<br/>0 studies</p>                                                                                                                                                                                                                                                                                                                                                                                                                                                                                                                                                                                                                                                         | <p>Adjusted or matched for age and sex<br/>0 studies</p>     |                         |                     |              |               |                  |           |                |                  |            |                |                  |             |           |                  |                      |  |                         |                                                                                                                                                                                                                                                                                                                                                                                                                                                                                                                        |        |         |                     |         |              |                  |          |       |                  |                      |  |                         |
| <p>Adjusted or matched for age, sex, and other variable<br/>Author: Altarawneh H<br/>Country: Qatar<br/>Protection (95% UI): 85.4 (72.4–92.2)</p>                                                                                                                                                                                                                                                                                                                                                                                                                                                                                                                                                   | <p>Adjusted or matched for other variables<br/>0 studies</p> |                         |                     |              |               |                  |           |                |                  |            |                |                  |             |           |                  |                      |  |                         |                                                                                                                                                                                                                                                                                                                                                                                                                                                                                                                        |        |         |                     |         |              |                  |          |       |                  |                      |  |                         |
| <b>Delta</b>                                                                                                                                                                                                                                                                                                                                                                                                                                                                                                                                                                                                                                                                                        |                                                              |                         |                     |              |               |                  |           |                |                  |            |                |                  |             |           |                  |                      |  |                         |                                                                                                                                                                                                                                                                                                                                                                                                                                                                                                                        |        |         |                     |         |              |                  |          |       |                  |                      |  |                         |
| <p>No adjustment/matching<br/>0 studies</p>                                                                                                                                                                                                                                                                                                                                                                                                                                                                                                                                                                                                                                                         | <p>Adjusted or matched for age and sex<br/>0 studies</p>     |                         |                     |              |               |                  |           |                |                  |            |                |                  |             |           |                  |                      |  |                         |                                                                                                                                                                                                                                                                                                                                                                                                                                                                                                                        |        |         |                     |         |              |                  |          |       |                  |                      |  |                         |
| <p>Adjusted or matched for age, sex, and other variable</p>                                                                                                                                                                                                                                                                                                                                                                                                                                                                                                                                                                                                                                         | <p>Adjusted or matched for other variables<br/>0 studies</p> |                         |                     |              |               |                  |           |                |                  |            |                |                  |             |           |                  |                      |  |                         |                                                                                                                                                                                                                                                                                                                                                                                                                                                                                                                        |        |         |                     |         |              |                  |          |       |                  |                      |  |                         |

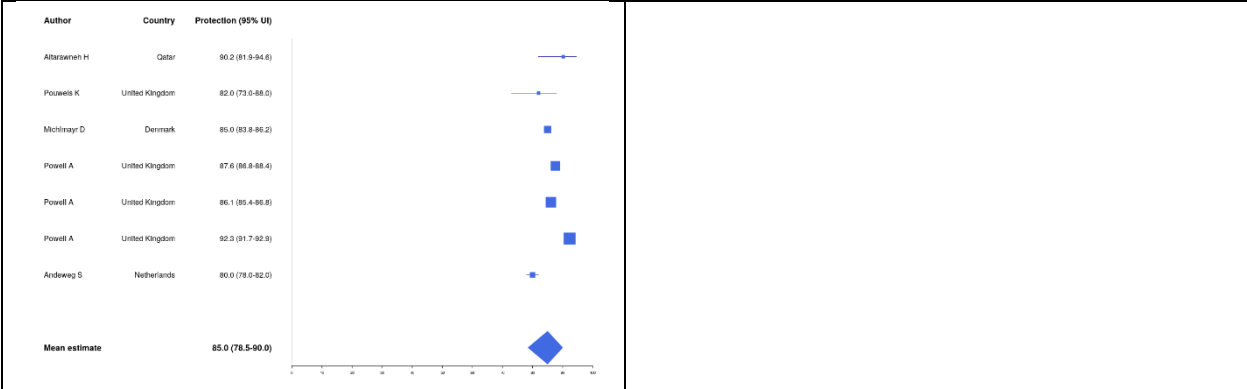

**Omicron BA.1**

|                                     |                                                  |
|-------------------------------------|--------------------------------------------------|
| No adjustment/matching<br>0 studies | Adjusted or matched for age and sex<br>0 studies |
|-------------------------------------|--------------------------------------------------|

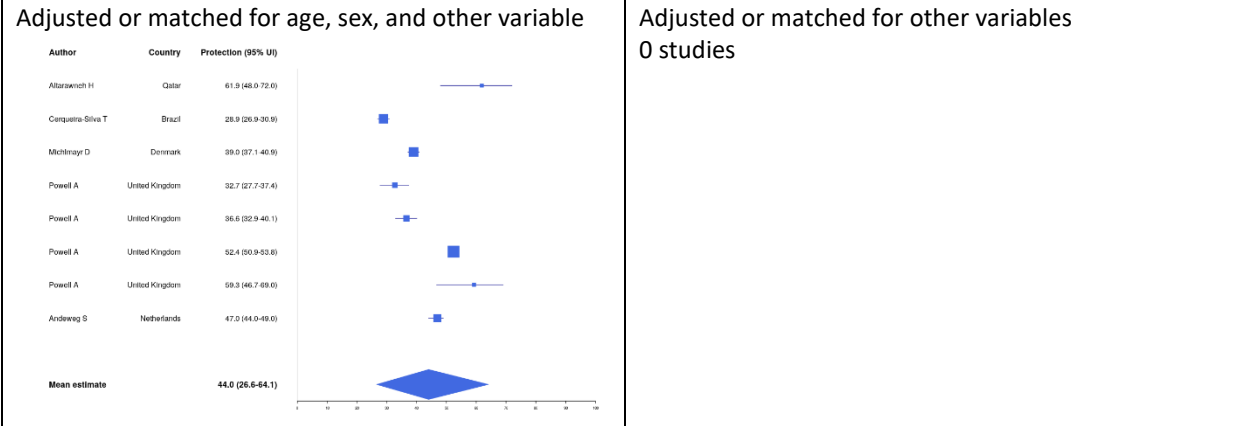

**Protection against severe disease**

**Ancestral**

|                                     |                                                  |
|-------------------------------------|--------------------------------------------------|
| No adjustment/matching<br>0 studies | Adjusted or matched for age and sex<br>0 studies |
|-------------------------------------|--------------------------------------------------|

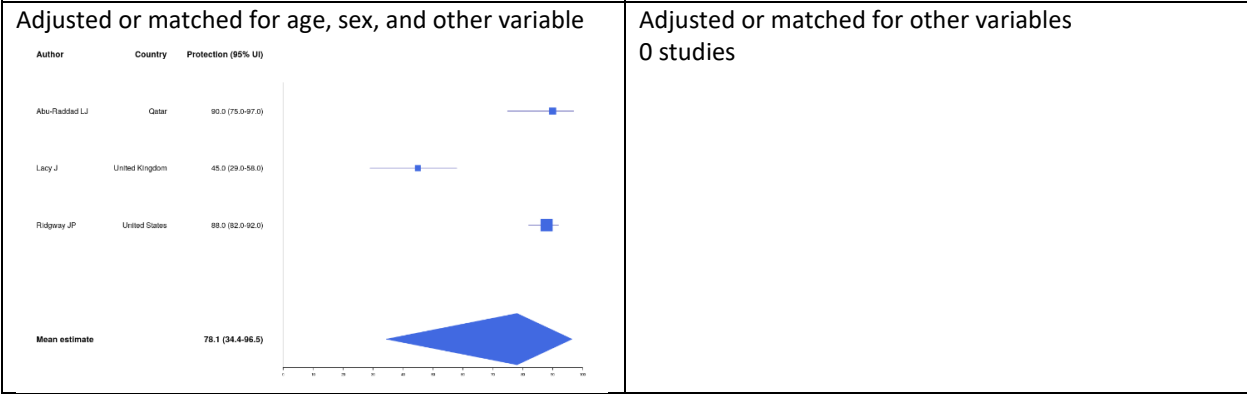

**Alpha**

|                                     |                                                  |
|-------------------------------------|--------------------------------------------------|
| No adjustment/matching<br>0 studies | Adjusted or matched for age and sex<br>0 studies |
|-------------------------------------|--------------------------------------------------|

|                                                      |                                                      |
|------------------------------------------------------|------------------------------------------------------|
| Adjusted or matched for age, sex, and other variable | Adjusted or matched for other variables<br>0 studies |
|------------------------------------------------------|------------------------------------------------------|

| <table border="1"> <thead> <tr> <th>Author</th> <th>Country</th> <th>Protection (95% UI)</th> </tr> </thead> <tbody> <tr> <td>Altarawneh H</td> <td>Qatar</td> <td>69.4 (1.0-95.2)</td> </tr> <tr> <td>Mohimayr D</td> <td>Denmark</td> <td>86.6 (46.3-95.7)</td> </tr> <tr> <td><b>Mean estimate</b></td> <td></td> <td><b>79.6 (43.3-95.3)</b></td> </tr> </tbody> </table> 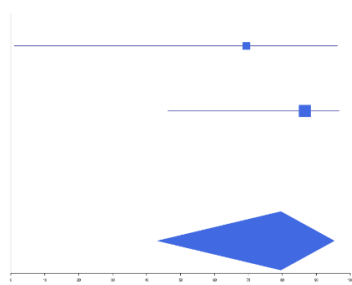                                                                                                                                                           | Author                                               | Country                 | Protection (95% UI) | Altarawneh H | Qatar | 69.4 (1.0-95.2)  | Mohimayr D        | Denmark | 86.6 (46.3-95.7) | <b>Mean estimate</b> |        | <b>79.6 (43.3-95.3)</b> |            |         |                  |                      |  |                         |  |
|---------------------------------------------------------------------------------------------------------------------------------------------------------------------------------------------------------------------------------------------------------------------------------------------------------------------------------------------------------------------------------------------------------------------------------------------------------------------------------------------------------------------------------------------------------------------------------------------------------------------------|------------------------------------------------------|-------------------------|---------------------|--------------|-------|------------------|-------------------|---------|------------------|----------------------|--------|-------------------------|------------|---------|------------------|----------------------|--|-------------------------|--|
| Author                                                                                                                                                                                                                                                                                                                                                                                                                                                                                                                                                                                                                    | Country                                              | Protection (95% UI)     |                     |              |       |                  |                   |         |                  |                      |        |                         |            |         |                  |                      |  |                         |  |
| Altarawneh H                                                                                                                                                                                                                                                                                                                                                                                                                                                                                                                                                                                                              | Qatar                                                | 69.4 (1.0-95.2)         |                     |              |       |                  |                   |         |                  |                      |        |                         |            |         |                  |                      |  |                         |  |
| Mohimayr D                                                                                                                                                                                                                                                                                                                                                                                                                                                                                                                                                                                                                | Denmark                                              | 86.6 (46.3-95.7)        |                     |              |       |                  |                   |         |                  |                      |        |                         |            |         |                  |                      |  |                         |  |
| <b>Mean estimate</b>                                                                                                                                                                                                                                                                                                                                                                                                                                                                                                                                                                                                      |                                                      | <b>79.6 (43.3-95.3)</b> |                     |              |       |                  |                   |         |                  |                      |        |                         |            |         |                  |                      |  |                         |  |
| <b>Beta</b>                                                                                                                                                                                                                                                                                                                                                                                                                                                                                                                                                                                                               |                                                      |                         |                     |              |       |                  |                   |         |                  |                      |        |                         |            |         |                  |                      |  |                         |  |
| No adjustment/matching<br>0 studies                                                                                                                                                                                                                                                                                                                                                                                                                                                                                                                                                                                       | Adjusted or matched for age and sex<br>0 studies     |                         |                     |              |       |                  |                   |         |                  |                      |        |                         |            |         |                  |                      |  |                         |  |
| Adjusted or matched for age, sex, and other variable<br>Author: Altarawneh H<br>Country: Qatar<br>Protection (95% UI): 88.0 (50.7-97.1)                                                                                                                                                                                                                                                                                                                                                                                                                                                                                   | Adjusted or matched for other variables<br>0 studies |                         |                     |              |       |                  |                   |         |                  |                      |        |                         |            |         |                  |                      |  |                         |  |
| <b>Delta</b>                                                                                                                                                                                                                                                                                                                                                                                                                                                                                                                                                                                                              |                                                      |                         |                     |              |       |                  |                   |         |                  |                      |        |                         |            |         |                  |                      |  |                         |  |
| No adjustment/matching<br>0 studies                                                                                                                                                                                                                                                                                                                                                                                                                                                                                                                                                                                       | Adjusted or matched for age and sex<br>0 studies     |                         |                     |              |       |                  |                   |         |                  |                      |        |                         |            |         |                  |                      |  |                         |  |
| Adjusted or matched for age, sex, and other variable                                                                                                                                                                                                                                                                                                                                                                                                                                                                                                                                                                      | Adjusted or matched for other variables<br>0 studies |                         |                     |              |       |                  |                   |         |                  |                      |        |                         |            |         |                  |                      |  |                         |  |
| <table border="1"> <thead> <tr> <th>Author</th> <th>Country</th> <th>Protection (95% UI)</th> </tr> </thead> <tbody> <tr> <td>Altarawneh H</td> <td>Qatar</td> <td>99.9 (13.3-99.9)</td> </tr> <tr> <td>Mohimayr D</td> <td>Denmark</td> <td>97.2 (89.0-99.3)</td> </tr> <tr> <td><b>Mean estimate</b></td> <td></td> <td><b>97.2 (85.2-99.6)</b></td> </tr> </tbody> </table>                                                                                                                                                          | Author                                               | Country                 | Protection (95% UI) | Altarawneh H | Qatar | 99.9 (13.3-99.9) | Mohimayr D        | Denmark | 97.2 (89.0-99.3) | <b>Mean estimate</b> |        | <b>97.2 (85.2-99.6)</b> |            |         |                  |                      |  |                         |  |
| Author                                                                                                                                                                                                                                                                                                                                                                                                                                                                                                                                                                                                                    | Country                                              | Protection (95% UI)     |                     |              |       |                  |                   |         |                  |                      |        |                         |            |         |                  |                      |  |                         |  |
| Altarawneh H                                                                                                                                                                                                                                                                                                                                                                                                                                                                                                                                                                                                              | Qatar                                                | 99.9 (13.3-99.9)        |                     |              |       |                  |                   |         |                  |                      |        |                         |            |         |                  |                      |  |                         |  |
| Mohimayr D                                                                                                                                                                                                                                                                                                                                                                                                                                                                                                                                                                                                                | Denmark                                              | 97.2 (89.0-99.3)        |                     |              |       |                  |                   |         |                  |                      |        |                         |            |         |                  |                      |  |                         |  |
| <b>Mean estimate</b>                                                                                                                                                                                                                                                                                                                                                                                                                                                                                                                                                                                                      |                                                      | <b>97.2 (85.2-99.6)</b> |                     |              |       |                  |                   |         |                  |                      |        |                         |            |         |                  |                      |  |                         |  |
| <b>Omicron BA.1</b>                                                                                                                                                                                                                                                                                                                                                                                                                                                                                                                                                                                                       |                                                      |                         |                     |              |       |                  |                   |         |                  |                      |        |                         |            |         |                  |                      |  |                         |  |
| No adjustment/matching<br>0 studies                                                                                                                                                                                                                                                                                                                                                                                                                                                                                                                                                                                       | Adjusted or matched for age and sex<br>0 studies     |                         |                     |              |       |                  |                   |         |                  |                      |        |                         |            |         |                  |                      |  |                         |  |
| Adjusted or matched for age, sex, and other variable                                                                                                                                                                                                                                                                                                                                                                                                                                                                                                                                                                      | Adjusted or matched for other variables<br>0 studies |                         |                     |              |       |                  |                   |         |                  |                      |        |                         |            |         |                  |                      |  |                         |  |
| <table border="1"> <thead> <tr> <th>Author</th> <th>Country</th> <th>Protection (95% UI)</th> </tr> </thead> <tbody> <tr> <td>Altarawneh H</td> <td>Qatar</td> <td>87.6 (47.5-97.1)</td> </tr> <tr> <td>Cerqueira-Silva T</td> <td>Brazil</td> <td>85.6 (82.7-88.0)</td> </tr> <tr> <td>Carabò S</td> <td>Canada</td> <td>81.0 (66.0-89.0)</td> </tr> <tr> <td>Mohimayr D</td> <td>Denmark</td> <td>69.8 (51.5-81.2)</td> </tr> <tr> <td><b>Mean estimate</b></td> <td></td> <td><b>81.9 (73.8-88.0)</b></td> </tr> </tbody> </table>  | Author                                               | Country                 | Protection (95% UI) | Altarawneh H | Qatar | 87.6 (47.5-97.1) | Cerqueira-Silva T | Brazil  | 85.6 (82.7-88.0) | Carabò S             | Canada | 81.0 (66.0-89.0)        | Mohimayr D | Denmark | 69.8 (51.5-81.2) | <b>Mean estimate</b> |  | <b>81.9 (73.8-88.0)</b> |  |
| Author                                                                                                                                                                                                                                                                                                                                                                                                                                                                                                                                                                                                                    | Country                                              | Protection (95% UI)     |                     |              |       |                  |                   |         |                  |                      |        |                         |            |         |                  |                      |  |                         |  |
| Altarawneh H                                                                                                                                                                                                                                                                                                                                                                                                                                                                                                                                                                                                              | Qatar                                                | 87.6 (47.5-97.1)        |                     |              |       |                  |                   |         |                  |                      |        |                         |            |         |                  |                      |  |                         |  |
| Cerqueira-Silva T                                                                                                                                                                                                                                                                                                                                                                                                                                                                                                                                                                                                         | Brazil                                               | 85.6 (82.7-88.0)        |                     |              |       |                  |                   |         |                  |                      |        |                         |            |         |                  |                      |  |                         |  |
| Carabò S                                                                                                                                                                                                                                                                                                                                                                                                                                                                                                                                                                                                                  | Canada                                               | 81.0 (66.0-89.0)        |                     |              |       |                  |                   |         |                  |                      |        |                         |            |         |                  |                      |  |                         |  |
| Mohimayr D                                                                                                                                                                                                                                                                                                                                                                                                                                                                                                                                                                                                                | Denmark                                              | 69.8 (51.5-81.2)        |                     |              |       |                  |                   |         |                  |                      |        |                         |            |         |                  |                      |  |                         |  |
| <b>Mean estimate</b>                                                                                                                                                                                                                                                                                                                                                                                                                                                                                                                                                                                                      |                                                      | <b>81.9 (73.8-88.0)</b> |                     |              |       |                  |                   |         |                  |                      |        |                         |            |         |                  |                      |  |                         |  |





**Figure S4** Publication bias assessment

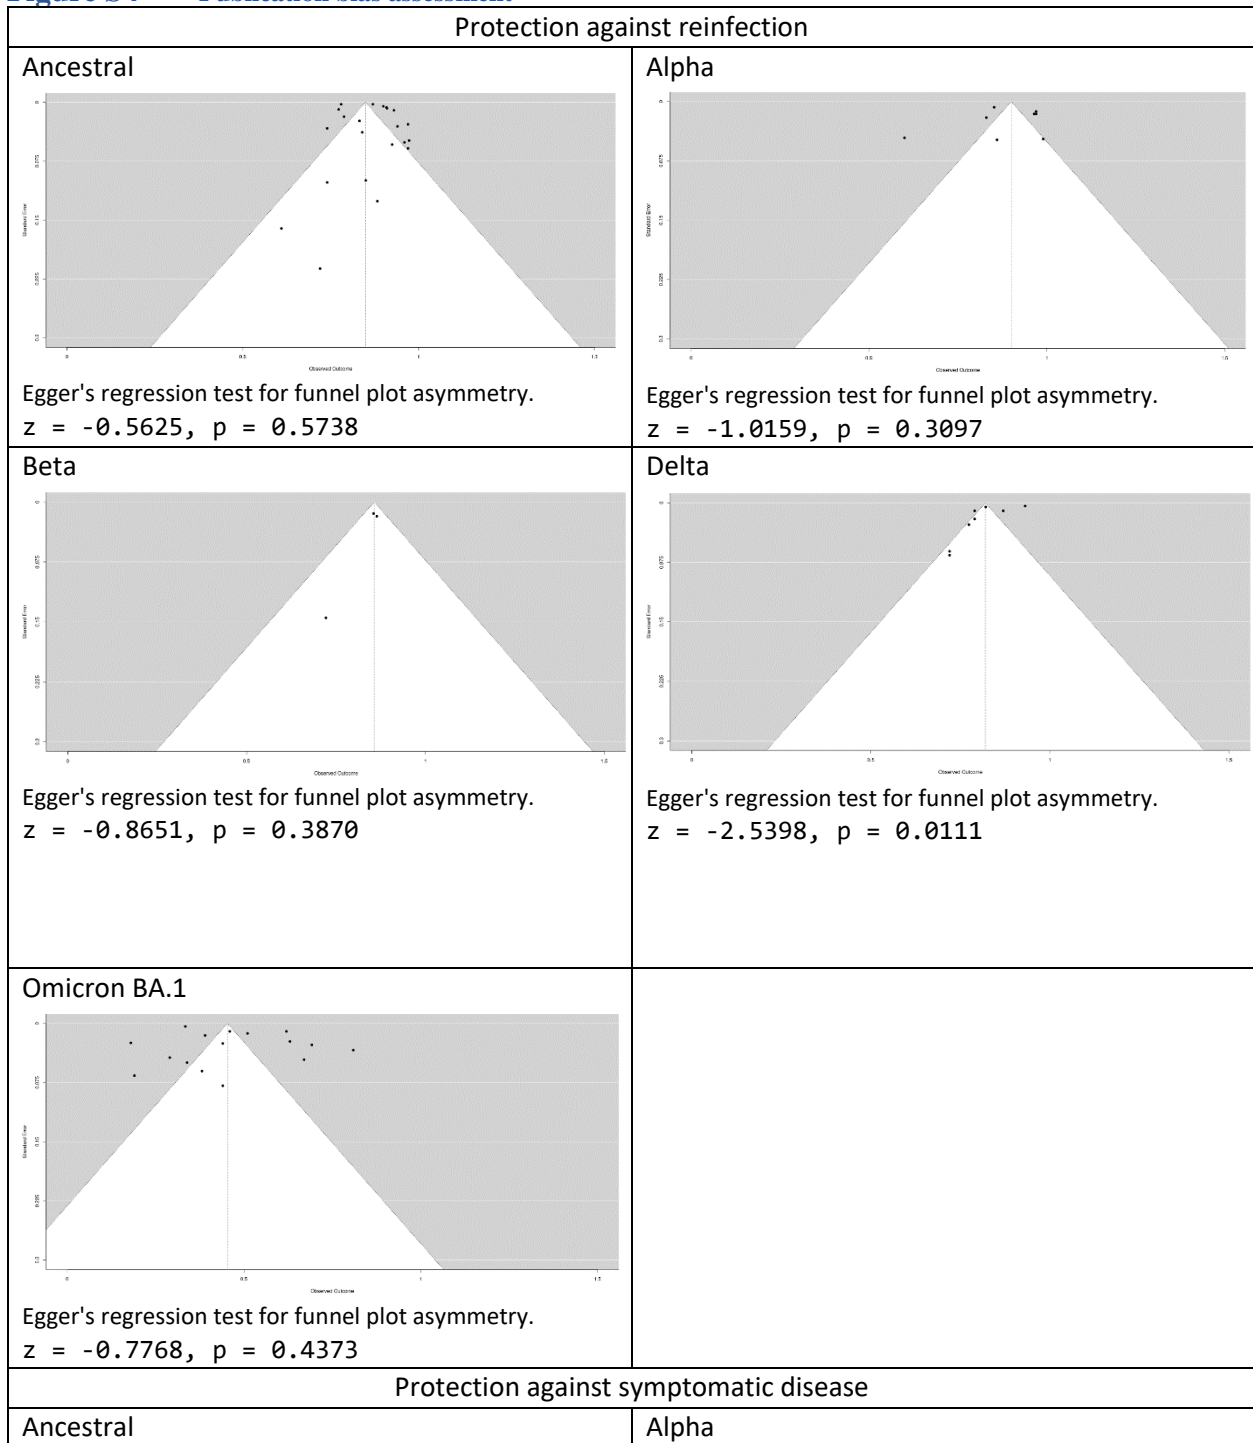

|                                                                                                                                                                                                                               |                                                                                                                                                                                                                                                         |
|-------------------------------------------------------------------------------------------------------------------------------------------------------------------------------------------------------------------------------|---------------------------------------------------------------------------------------------------------------------------------------------------------------------------------------------------------------------------------------------------------|
| 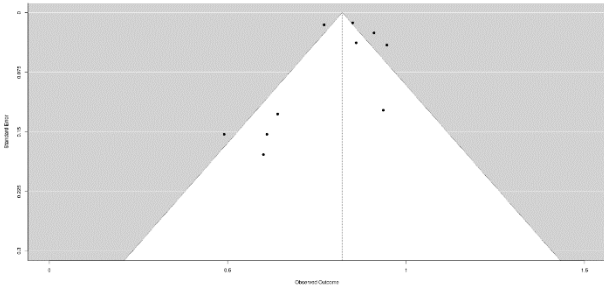 <p>Egger's regression test for funnel plot asymmetry.<br/> <math>z = -2.2226</math>, <math>p = 0.0262</math></p>                            |  <p>Egger's regression test for funnel plot asymmetry.<br/> <math>z = 0.7302</math>, <math>p = 0.4653</math></p>                                                      |
| <p><b>Beta</b><br/> Author: Altarawneh H<br/> Country: Qatar<br/> Protection (95% UI): 85.4 (72.4–92.2)</p>                                                                                                                   | <p><b>Delta</b></p>  <p>Egger's regression test for funnel plot asymmetry.<br/> <math>z = -0.4368</math>, <math>p = 0.6622</math></p>                                 |
| <p><b>Omicron BA.1</b></p>  <p>Egger's regression test for funnel plot asymmetry.<br/> <math>z = 2.0055</math>, <math>p = 0.0449</math></p> |                                                                                                                                                                                                                                                         |
| <p>Protection against severe disease</p>                                                                                                                                                                                      |                                                                                                                                                                                                                                                         |
| <p><b>Ancestral</b></p>  <p>Egger's regression test for funnel plot asymmetry.<br/> <math>z = -1.1403</math>, <math>p = 0.2542</math></p>  | <p><b>Alpha</b></p>  <p>Egger's regression test for funnel plot asymmetry.<br/> Number of parameters to be estimated is larger than the number of observations.</p> |
| <p><b>Beta</b><br/> Author: Altarawneh H</p>                                                                                                                                                                                  | <p><b>Delta</b></p>                                                                                                                                                                                                                                     |

Country: Qatar  
Protection (95% UI): 88.0 (50.7–97.1)

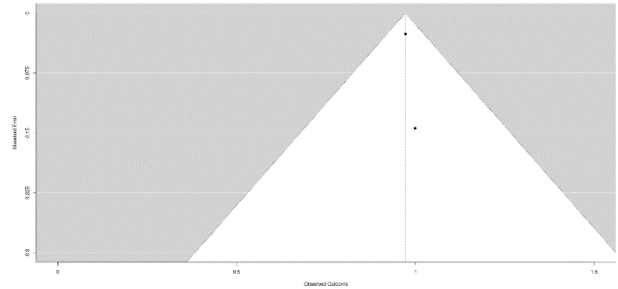

Egger's regression test for funnel plot asymmetry.  
Number of parameters to be estimated is larger than the  
number of observations.

Omicron BA.1

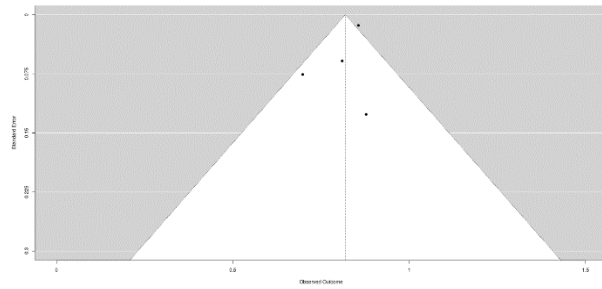

Egger's regression test for funnel plot asymmetry.  
 $z = -1.4175$ ,  $p = 0.1563$

**Table S1** Data inputs and characteristics of included studies

| First author name         | Study design               | Age or median age | Country | Variant (1 <sup>st</sup> infection) | Variant (2 <sup>nd</sup> infection) | Outcome     | Parameter | Adjustment                     | Mean efficacy | Lower 95% CI | Upper 95% CI | Interval or mean time since infection (in weeks) |
|---------------------------|----------------------------|-------------------|---------|-------------------------------------|-------------------------------------|-------------|-----------|--------------------------------|---------------|--------------|--------------|--------------------------------------------------|
| Berec L <sup>3</sup>      | retrospective cohort       | >12               | Czechia | mixed variant                       | all variant                         | infection   | 1 - aHR   | Age and sex                    | 0.99          | 0.98         | 0.99         | 0-8                                              |
|                           |                            |                   |         | mixed variant                       | all variant                         | infection   | 1 - aHR   |                                | 0.97          | 0.965        | 0.975        | 9-16                                             |
|                           |                            |                   |         | mixed variant                       | all variant                         | infection   | 1 - aHR   |                                | 0.91          | 0.905        | 0.915        | 17-24                                            |
|                           |                            |                   |         | mixed variant                       | all variant                         | infection   | 1 - aHR   |                                | 0.92          | 0.915        | 0.925        | 25-32                                            |
|                           |                            |                   |         | mixed variant                       | all variant                         | infection   | 1 - aHR   |                                | 0.9           | 0.895        | 0.905        | 33-40                                            |
|                           |                            |                   |         | mixed variant                       | all variant                         | infection   | 1 - aHR   |                                | 0.84          | 0.835        | 0.845        | 41-48                                            |
|                           |                            |                   |         | mixed variant                       | all variant                         | infection   | 1 - aHR   |                                | 0.79          | 0.78         | 0.8          | 49-56                                            |
|                           |                            |                   |         | mixed variant                       | all variant                         | infection   | 1 - aHR   |                                | 0.71          | 0.685        | 0.72         | 57-64                                            |
|                           |                            |                   |         | mixed variant                       | all variant                         | infection   | 1 - aHR   |                                | 0.71          | 0.65         | 0.78         | 65-72                                            |
| Hansen C <sup>4</sup>     | retrospective cohort       | >18               | Denmark | Ancestral                           | Ancestral                           | infection   | 1 - aRR   | Age, sex, and other covariates | 0.788         | 0.749        | 0.821        | NA                                               |
|                           |                            |                   |         | Ancestral                           | Ancestral                           | infection   | 1 - aRR   |                                | 0.793         | 0.744        | 0.833        | 12_24                                            |
|                           |                            |                   |         | Ancestral                           | Ancestral                           | infection   | 1 - aRR   |                                | 0.777         | 0.709        | 0.829        | 25_32                                            |
| Altarawneh H <sup>5</sup> | test-negative case-control | All ages          | Qatar   | Ancestral                           | Alpha                               | symptomatic | 1 - aOR   | Age, sex, and other covariates | 0.953         | 0.66         | 0.993        | NA                                               |
|                           |                            |                   | Qatar   | Ancestral                           | Beta                                | symptomatic | 1 - aOR   |                                | 0.854         | 0.724        | 0.922        | NA                                               |
|                           |                            |                   | Qatar   | mixed variant                       | Delta                               | symptomatic | 1 - aOR   |                                | 0.902         | 0.819        | 0.946        | NA                                               |

|  |  |  |       |               |                                   |                         |         |  |       |       |       |       |
|--|--|--|-------|---------------|-----------------------------------|-------------------------|---------|--|-------|-------|-------|-------|
|  |  |  | Qatar | mixed variant | Omicron (unspecified sub-lineage) | symptomatic             | 1 - aOR |  | 0.619 | 0.48  | 0.72  | NA    |
|  |  |  | Qatar | Ancestral     | Alpha                             | hospitalisation & death | 1 - aOR |  | 0.694 | 0.01  | 0.962 | NA    |
|  |  |  | Qatar | Ancestral     | Beta                              | hospitalisation & death | 1 - aOR |  | 0.88  | 0.507 | 0.971 | NA    |
|  |  |  | Qatar | mixed variant | Delta                             | hospitalisation & death | 1 - aOR |  | 0.999 | 0.433 | 0.999 | NA    |
|  |  |  | Qatar | mixed variant | Omicron (unspecified sub-lineage) | hospitalisation & death | 1 - aOR |  | 0.878 | 0.475 | 0.971 | NA    |
|  |  |  | Qatar | Ancestral     | Alpha                             | infection               | 1 - aOR |  | 0.894 | 0.226 | 0.985 | 12_32 |
|  |  |  | Qatar | Ancestral     | Alpha                             | infection               | 1 - aOR |  | 0.91  | 0.345 | 0.988 | 33_56 |
|  |  |  | Qatar | Ancestral     | Beta                              | infection               | 1 - aOR |  | 0.926 | 0.767 | 0.976 | 12_32 |
|  |  |  | Qatar | Ancestral     | Beta                              | infection               | 1 - aOR |  | 0.812 | 0.655 | 0.898 | 33_56 |
|  |  |  | Qatar | mixed variant | Delta                             | infection               | 1 - aOR |  | 0.934 | 0.876 | 0.965 | 12_32 |
|  |  |  | Qatar | mixed variant | Delta                             | infection               | 1 - aOR |  | 0.911 | 0.833 | 0.953 | 33_56 |
|  |  |  | Qatar | mixed variant | Delta                             | infection               | 1 - aOR |  | 0.871 | 0.594 | 0.959 | >56   |
|  |  |  | Qatar | mixed variant | Omicron (unspecified sub-lineage) | infection               | 1 - aOR |  | 0.64  | 0.547 | 0.714 | 12_32 |
|  |  |  | Qatar | mixed variant | Omicron (unspecified sub-lineage) | infection               | 1 - aOR |  | 0.472 | 0.375 | 0.554 | 33_56 |

|                           |                            |       |         |               |                                   |                 |          |                                |       |       |       |      |
|---------------------------|----------------------------|-------|---------|---------------|-----------------------------------|-----------------|----------|--------------------------------|-------|-------|-------|------|
|                           |                            |       | Qatar   | mixed variant | Omicron (unspecified sub-lineage) | infection       | 1 - aOR  |                                | 0.596 | 0.507 | 0.67  | >56  |
| Rane M <sup>6</sup>       | test-negative case-control | >12   | US      | mixed variant | Delta                             | Symptomatic     | 1 - aOR  | Age, sex, and other covariates | 0.9   | 0.87  | 0.93  | 34*  |
| Smid M <sup>7</sup>       | retrospective cohort       | >5    | Czechia | mixed variant | Omicron (unspecified sub-lineage) | hospitalisation | 1 - aHR  | Age and sex                    | 0.87  | 0.73  | 0.94  | 2_24 |
|                           |                            |       |         | mixed variant | Omicron (unspecified sub-lineage) | hospitalisation | 1 - aHR  |                                | 0.92  | 0.86  | 0.96  | >24  |
|                           |                            |       |         | mixed variant | Delta                             | hospitalisation | 1 - aHR  |                                | 0.99  | 0.98  | 0.99  | 2_24 |
|                           |                            |       |         | mixed variant | Delta                             | hospitalisation | 1 - aHR  |                                | 0.95  | 0.93  | 0.96  | >24  |
|                           |                            |       |         | mixed variant | Omicron (unspecified sub-lineage) | infection       | 1 - aHR  |                                | 0.68  | 0.68  | 0.69  | 2_24 |
|                           |                            |       |         | mixed variant | Omicron (unspecified sub-lineage) | infection       | 1 - aHR  |                                | 0.13  | 0.1   | 0.14  | >24  |
|                           |                            |       |         | mixed variant | Delta                             | infection       | 1 - aHR  |                                | 0.95  | 0.94  | 0.96  | 2_24 |
|                           |                            |       |         | mixed variant | Delta                             | infection       | 1 - aHR  |                                | 0.83  | 0.82  | 0.84  | >24  |
| Abu-Raddad L <sup>8</sup> | retrospective cohort       | 10-74 | Qatar   | Ancestral     | Ancestral                         | infection       | 1 - aOR  | Other covariates               | 0.927 | 0.913 | 0.939 | 17*  |
| Hall V <sup>9</sup>       | prospective cohort         | >18   | UK      | Ancestral     | Alpha                             | infection       | 1 - aIRR | Age and sex                    | 0.84  | 0.81  | 0.87  | 29*  |
| Hall V <sup>10</sup>      | prospective cohort         | >25   | UK      | all variant   | all variant                       | infection       | 1 - aHR  | Other covariates               | 0.86  | 0.81  | 0.89  | 0_51 |



|                            |                      |       |             |             |               |             |          |                                |       |       |       |        |
|----------------------------|----------------------|-------|-------------|-------------|---------------|-------------|----------|--------------------------------|-------|-------|-------|--------|
|                            |                      |       |             | all variant | all variant   | infection   | 1 - aHR  |                                | 0.69  | 0.38  | 0.84  | 52_104 |
| Pilz S <sup>11</sup>       | retrospective cohort | 15-93 | Austria     | Ancestral   | Ancestral     | infection   | 1 - OR   | No adjustment                  | 0.91  | 0.87  | 0.93  | 30*    |
| Rennert L <sup>12</sup>    | retrospective cohort | 18-24 | US          | Ancestral   | mixed variant | infection   | 1 - aRR  | Age, sex, and other covariates | 0.84  | 0.78  | 0.88  | 18*    |
| Sheehan M <sup>13</sup>    | retrospective cohort | 18-80 | US          | Ancestral   | Ancestral     | infection   | 1 - OR   | No adjustment                  | 0.818 | 0.766 | 0.858 | 20*    |
|                            |                      |       | US          | Ancestral   | Ancestral     | Symptomatic | 1 - OR   |                                | 0.845 | 0.779 | 0.891 | 20*    |
| Vitale J <sup>14</sup>     | retrospective cohort | 18-80 | Italy       | Ancestral   | Ancestral     | infection   | 1 - aHR  | Age, sex, and other covariates | 0.94  | 0.92  | 0.95  | 34*    |
| Wilkins J <sup>15</sup>    | prospective cohort   | >18   | US          | Ancestral   | Ancestral     | infection   | 1 - aIRR | Age, sex, and other covariates | 0.74  | 0.47  | 0.87  | NA     |
| Letizia A <sup>16</sup>    | prospective cohort   | 18-20 | US          | Ancestral   | Ancestral     | infection   | 1 - aOR  | Age, sex, and other covariates | 0.84  | 0.75  | 0.9   | NA     |
| Abo-Leyah H <sup>17</sup>  | prospective cohort   | >18   | UK          | Ancestral   | Ancestral     | Symptomatic | 1 - OR   | No adjustment                  | 0.85  | 0.65  | 0.94  | 11*    |
| Lumley S <sup>18</sup>     | longitudinal cohort  | 39*   | UK          | Ancestral   | Alpha         | Symptomatic | 1 - aIRR | Age, sex, and other covariates | 0.98  | 0.82  | 0.99  | NA     |
|                            |                      |       | UK          | Ancestral   | Alpha         | infection   | 1 - aIRR |                                | 0.86  | 0.74  | 0.93  | NA     |
| Breathnach A <sup>19</sup> | retrospective cohort | 50*   | UK          | Ancestral   | Ancestral     | infection   | 1 - RR   | No adjustment                  | 0.94  | 0.88  | 0.97  | 32*    |
| Manica M <sup>20</sup>     | retrospective cohort | 50*   | Italy       | Ancestral   | Ancestral     | Symptomatic | 1 - aOR  | Age, sex, and other covariates | 0.946 | 0.831 | 0.991 | NA     |
| Leidi A <sup>21</sup>      | retrospective cohort | >12   | Switzerland | Ancestral   | Ancestral     | infection   | 1 - HR   | No adjustment                  | 0.94  | 0.86  | 0.98  | NA     |
| Pouwels K <sup>22</sup>    | prospective cohort   | >18   | UK          | Ancestral   | Alpha         | Symptomatic | 1 - aOR  | Age, sex, and other covariates | 0.8   | 0.75  | 0.84  | NA     |
|                            |                      |       |             | Ancestral   | Alpha         | infection   | 1 - aOR  |                                | 0.6   | 0.5   | 0.68  | NA     |

|                           |                            |          |          |                     |                                   |             |         |                                |       |       |       |       |
|---------------------------|----------------------------|----------|----------|---------------------|-----------------------------------|-------------|---------|--------------------------------|-------|-------|-------|-------|
|                           |                            |          |          | Ancestral and Alpha | Delta                             | Symptomatic | 1 - aOR |                                | 0.82  | 0.73  | 0.88  | NA    |
|                           |                            |          |          | Ancestral and Alpha | Delta                             | infection   | 1 - aOR |                                | 0.72  | 0.58  | 0.82  | NA    |
| Pritchard E <sup>23</sup> | prospective cohort         | >18      | UK       | Ancestral and Alpha | Ancestral and Alpha               | infection   | 1 - aOR | Age, sex, and other covariates | 0.28  | 0.1   | 0.43  | 0_15  |
|                           |                            |          |          | Ancestral and Alpha | Ancestral and Alpha               | infection   | 1 - aOR |                                | 0.7   | 0.56  | 0.79  | 16_32 |
|                           |                            |          |          | Ancestral and Alpha | Ancestral and Alpha               | Symptomatic | 1 - aOR |                                | 0.67  | 0.5   | 0.88  | 0_15  |
|                           |                            |          |          | Ancestral and Alpha | Ancestral and Alpha               | Symptomatic | 1 - aOR |                                | 0.95  | 0.85  | 0.985 | 16_32 |
|                           |                            |          |          | Ancestral and Alpha | Alpha                             | infection   | 1 - aOR |                                | 0.42  | 0.19  | 0.58  | 0_15  |
|                           |                            |          |          | Ancestral and Alpha | Alpha                             | infection   | 1 - aOR |                                | 0.81  | 0.66  | 0.9   | 16_32 |
| Wang X <sup>24</sup>      | test-negative case-control | All ages | US       | mixed variant       | Delta                             | infection   | 1 - aOR | Age, sex, and other covariates | 0.87  | 0.85  | 0.89  | NA    |
|                           |                            |          |          | mixed variant       | Omicron (unspecified sub-lineage) | infection   | 1 - aOR |                                | 0.39  | 0.36  | 0.42  | NA    |
|                           |                            |          |          | mixed variant       | Omicron (unspecified sub-lineage) | infection   | 1 - OR  |                                | 0.339 | 0.236 | 0.431 | NA    |
| Willett B <sup>25</sup>   | test-negative case-control | 18-108   | Scotland | mixed variant       | Delta                             | infection   | 1 - OR  | No adjustment                  | 0.774 | 0.715 | 0.823 | NA    |
|                           |                            |          |          | mixed variant       | Omicron (unspecif                 | infection   | 1 - OR  |                                | 0.339 | 0.236 | 0.431 | NA    |

|                                 |                            |          |        |               |                                   |                         |         |                                |       |       |       |       |
|---------------------------------|----------------------------|----------|--------|---------------|-----------------------------------|-------------------------|---------|--------------------------------|-------|-------|-------|-------|
|                                 |                            |          |        |               | ied sub-lineage)                  |                         |         |                                |       |       |       |       |
| Altarawneh H <sup>26</sup>      | test-negative case-control | All ages | Qatar  | mixed variant | Omicron (unspecified sub-lineage) | Symptomatic             | 1 - OR  | Age, sex, and other covariates | 0.508 | 0.454 | 0.557 | 46*   |
|                                 |                            |          |        | mixed variant | Omicron BA.1                      | Symptomatic             | 1 - OR  |                                | 0.505 | 0.381 | 0.599 | 46*   |
|                                 |                            |          |        | mixed variant | Omicron BA.2                      | Symptomatic             | 1 - OR  |                                | 0.461 | 0.395 | 0.519 | 46*   |
|                                 |                            |          |        | mixed variant | Omicron (unspecified sub-lineage) | hospitalisation         | 1 - OR  |                                | 0.716 | 0.157 | 0.904 | 46*   |
|                                 |                            |          |        | mixed variant | Omicron BA.2                      | hospitalisation         | 1 - OR  |                                | 0.734 | 0.002 | 0.929 | 46*   |
| Starrfelt J <sup>27</sup>       | retrospective cohort       | >18      | Norway | mixed variant | Delta                             | infection               | 1 - aHR | Age, sex, and other covariates | 0.931 | 0.923 | 0.939 | NA    |
| Cerqueira-Silva T <sup>28</sup> | test-negative case-control | >18      | Brazil | mixed variant | Omicron (unspecified sub-lineage) | Symptomatic             | 1 - aOR | Age, sex, and other covariates | 0.289 | 0.269 | 0.309 | NA    |
|                                 |                            |          |        | mixed variant | Omicron (unspecified sub-lineage) | hospitalisation & death | 1 - aOR |                                | 0.856 | 0.827 | 0.88  | NA    |
|                                 |                            |          |        | mixed variant | Omicron (unspecified sub-lineage) | hospitalisation & death | 1 - aOR |                                | 0.845 | 0.731 | 0.911 | 12_23 |
|                                 |                            |          |        | mixed variant | Omicron (unspecified sub-lineage) | hospitalisation & death | 1 - aOR |                                | 0.895 | 0.86  | 0.922 | 24_51 |
|                                 |                            |          |        | mixed variant | Omicron (unspecified sub-lineage) | hospitalisation & death | 1 - aOR |                                | 0.803 | 0.744 | 0.848 | >52   |

|                        |                            |     |        |               |                                   |                 |         |                                |       |       |       |       |
|------------------------|----------------------------|-----|--------|---------------|-----------------------------------|-----------------|---------|--------------------------------|-------|-------|-------|-------|
|                        |                            |     |        | mixed variant | Omicron (unspecified sub-lineage) | Symptomatic     | 1 - aOR |                                | 0.528 | 0.483 | 0.568 | 12_23 |
|                        |                            |     |        | mixed variant | Omicron (unspecified sub-lineage) | Symptomatic     | 1 - aOR |                                | 0.327 | 0.302 | 0.352 | 24_51 |
|                        |                            |     |        | mixed variant | Omicron (unspecified sub-lineage) | Symptomatic     | 1 - aOR |                                | 0.147 | 0.108 | 0.185 | >52   |
| Carazo S <sup>29</sup> | test-negative case-control | >12 | Canada | mixed variant | Omicron (unspecified sub-lineage) | infection       | 1 - aOR | Age, sex, and other covariates | 0.44  | 0.38  | 0.48  | NA    |
|                        |                            |     |        | Ancestral     | Omicron (unspecified sub-lineage) | infection       | 1 - aOR |                                | 0.29  | 0.2   | 0.37  | NA    |
|                        |                            |     |        | Alpha         | Omicron (unspecified sub-lineage) | infection       | 1 - aOR |                                | 0.44  | 0.26  | 0.57  | NA    |
|                        |                            |     |        | Delta         | Omicron (unspecified sub-lineage) | infection       | 1 - aOR |                                | 0.67  | 0.57  | 0.75  | NA    |
|                        |                            |     |        | mixed variant | Omicron (unspecified sub-lineage) | hospitalisation | 1 - aOR |                                | 0.81  | 0.66  | 0.89  | NA    |
|                        |                            |     |        | mixed variant | Omicron (unspecified sub-lineage) | infection       | 1 - aOR |                                | 0.66  | 0.57  | 0.73  | 12_23 |
|                        |                            |     |        | mixed variant | Omicron (unspecified sub-lineage) | infection       | 1 - aOR |                                | 0.49  | 0.32  | 0.61  | 24_35 |

|                                             |                            |       |        |               |                                   |                 |         |                                |       |       |      |       |
|---------------------------------------------|----------------------------|-------|--------|---------------|-----------------------------------|-----------------|---------|--------------------------------|-------|-------|------|-------|
|                                             |                            |       |        | Ancestral     | Omicron (unspecified sub-lineage) | infection       | 1 - aOR |                                | 0.35  | 0.21  | 0.47 | 36_47 |
|                                             |                            |       |        | Delta         | Omicron (unspecified sub-lineage) | infection       | 1 - aOR |                                | 0.29  | 0.17  | 0.38 | 48_75 |
|                                             |                            |       |        | Alpha         | Omicron (unspecified sub-lineage) | infection       | 1 - aOR |                                | 0.27  | 0.08  | 0.42 | 76_96 |
| Nordstrom P <sup>30</sup>                   | retrospective cohort       | 39.9* | Sweden | mixed variant | mixed variant                     | infection       | 1 - aHR | Age, sex, and other covariates | 0.48  | 0.47  | 0.48 | 2_12  |
|                                             |                            |       |        | mixed variant | mixed variant                     | infection       | 1 - aHR |                                | 0.96  | 0.95  | 0.96 | 13_24 |
|                                             |                            |       |        | mixed variant | mixed variant                     | infection       | 1 - aHR |                                | 0.92  | 0.91  | 0.93 | 25_36 |
|                                             |                            |       |        | mixed variant | mixed variant                     | infection       | 1 - aHR |                                | 0.93  | 0.92  | 0.98 | >36   |
|                                             |                            |       |        | mixed variant | mixed variant                     | hospitalisation | 1 - aHR |                                | 0.89  | 0.86  | 0.91 | 13_24 |
|                                             |                            |       |        | mixed variant | mixed variant                     | hospitalisation | 1 - aHR |                                | 0.85  | 0.09  | 0.78 | 25_36 |
|                                             |                            |       |        | mixed variant | mixed variant                     | hospitalisation | 1 - aHR |                                | 0.78  | 0.085 | 0.66 | >36   |
| Office of National Statistics <sup>31</sup> | prospective cohort         | >2    | UK     | mixed variant | mixed variant                     | infection       | NA      | NA                             | 0.909 | 0.894 | 0.92 | NA    |
| Imperial College <sup>32</sup>              | test-negative case-control | NA    | UK     | mixed variant | Omicron (unspecified sub-lineage) | infection       | 1 - RR  | No adjustment                  | 0.19  | 0     | 0.27 | NA    |
| Jeffery-Smith A <sup>33</sup>               | prospective cohort         | NA    | UK     | Ancestral     | Ancestral                         | infection       | 1 - RR  | No adjustment                  | 0.96  | 0.79  | 0.99 | NA    |
| Gallais F <sup>34</sup>                     | prospective cohort         | 39*   | France | Ancestral     | mixed variant                     | infection       | 1 - HR  | No adjustment                  | 0.97  | 0.76  | 0.99 | NA    |

|                             |                            |          |         |               |                                   |             |         |                                |       |       |       |       |
|-----------------------------|----------------------------|----------|---------|---------------|-----------------------------------|-------------|---------|--------------------------------|-------|-------|-------|-------|
| Krutikov M <sup>35</sup>    | prospective cohort         | 18-64    | UK      | Ancestral     | mixed variant                     | infection   | 1 - aHR | Age, sex, and other covariates | 0.61  | 0.18  | 0.81  | NA    |
|                             |                            | >64      | UK      | Ancestral     | mixed variant                     | infection   | 1 - aHR |                                | 0.85  | 0.56  | 0.95  | NA    |
| Harvey R <sup>36</sup>      | retrospective cohort       | 48*      | US      | Ancestral     | Ancestral                         | infection   | 1 - RR  | No adjustment                  | 0.9   | 0.89  | 0.91  | NA    |
| Maier H <sup>37</sup>       | prospective cohort         | 0-96     | US      | mixed variant | mixed variant                     | infection   | 1 - OR  | No adjustment                  | 0.883 | 0.48  | 0.974 | NA    |
|                             |                            |          | US      | mixed variant | mixed variant                     | Symptomatic | 1 - OR  |                                | 0.936 | 0.511 | 0.992 | NA    |
| Chemaiteily H <sup>38</sup> | retrospective cohort       | All ages | Qatar   | Omicron BA.1  | Omicron BA.2                      | infection   | 1 - aHR | Age, sex, and other covariates | 0.942 | 0.892 | 0.969 | NA    |
|                             |                            |          |         | Omicron BA.2  | Omicron BA.1                      | infection   | 1 - aHR |                                | 0.809 | 0.731 | 0.864 | NA    |
| Satwik R <sup>39</sup>      | retrospective cohort       | NA       | India   | mixed variant | Delta                             | Symptomatic | 1 - aHR | Age, sex, and other covariates | 0.93  | 0.87  | 0.96  | 38*   |
| Chin E <sup>40</sup>        | test-negative case-control | >18      | US      | mixed variant | Omicron (unspecified sub-lineage) | infection   | 1 - aOR | Age, sex, and other covariates | 0.257 | 0.234 | 0.316 | 59*   |
|                             |                            |          |         | Delta         | Omicron (unspecified sub-lineage) | infection   | 1 - aOR |                                | 0.608 | 0.584 | 0.668 | 21*   |
| Braeye T <sup>41</sup>      | retrospective cohort       | 0-84     | Belgium | mixed variant | Delta                             | infection   | 1 - aOR | Age, sex, and other covariates | 0.79  | 0.75  | 0.83  | NA    |
|                             |                            |          |         | mixed variant | Alpha                             | infection   | 1 - aOR |                                | 0.83  | 0.8   | 0.88  | NA    |
|                             |                            |          |         | mixed variant | Delta                             | infection   | 1 - aOR |                                | 0.79  | 0.74  | 0.83  | 0_7   |
|                             |                            |          |         | mixed variant | Delta                             | infection   | 1 - aOR |                                | 0.64  | 0.61  | 0.66  | 21_28 |
| Ayoub H <sup>42</sup>       | test-negative case-control | All ages | Qatar   | mixed variant | Alpha                             | infection   | 1 - aOR | Age, sex, and other covariates | 0.97  | 0.936 | 0.986 | NA    |
|                             |                            |          |         | mixed variant | Beta                              | infection   | 1 - aOR |                                | 0.855 | 0.824 | 0.881 | NA    |

|                              |                            |          |         |                                   |                   |             |          |                                |       |        |       |       |
|------------------------------|----------------------------|----------|---------|-----------------------------------|-------------------|-------------|----------|--------------------------------|-------|--------|-------|-------|
| Chemaite lly H <sup>43</sup> | retrospective cohort       | All ages | Qatar   | mixed variant                     | Alpha             | infection   | 1 - aHR  | Age, sex, and other covariates | 0.964 | 0.921  | 0.983 | NA    |
|                              |                            |          |         | mixed variant                     | Beta              | infection   | 1 - aHR  |                                | 0.864 | 0.825  | 0.895 | NA    |
| Petras M <sup>44</sup>       | retrospective cohort       | All ages | Czechia | mixed variant                     | mixed variant     | infection   | 1 - aIRR | Age, sex, and other covariates | 0.925 | 0.765  | 0.976 | NA    |
| Carazo S <sup>29</sup>       | test-negative case-control | >18      | Canada  | mixed variant                     | Omicron BA.2      | infection   | 1 - aOR  | Age, sex, and other covariates | NA    | NA     | NA    | 4_7   |
|                              |                            |          |         | mixed variant                     | Omicron BA.2      | infection   | 1 - aOR  |                                | NA    | NA     | NA    | 8_11  |
|                              |                            |          |         | mixed variant                     | Omicron BA.2      | infection   | 1 - aOR  |                                | 0.42  | -0.47  | 0.77  | 12_23 |
|                              |                            |          |         | mixed variant                     | Omicron BA.2      | infection   | 1 - aOR  |                                | 0.39  | 0      | 0.63  | 24_51 |
|                              |                            |          |         | mixed variant                     | Omicron BA.2      | infection   | 1 - aOR  |                                | 0.42  | 0.17   | 0.6   | >51   |
|                              |                            |          |         | Omicron BA.1                      | Omicron BA.2      | infection   | 1 - aOR  |                                | 0.82  | 0.49   | 0.94  | 4_7   |
|                              |                            |          |         | Omicron BA.1                      | Omicron BA.2      | infection   | 1 - aOR  |                                | 0.76  | 0.63   | 0.85  | 8_11  |
|                              |                            |          |         | Omicron BA.1                      | Omicron BA.2      | infection   | 1 - aOR  |                                | 0.7   | 0.61   | 0.77  | 12_23 |
|                              |                            |          |         | Omicron BA.1                      | Omicron BA.2      | infection   | 1 - aOR  |                                | NA    | NA     | NA    | 24_51 |
|                              |                            |          |         | Omicron BA.1                      | Omicron BA.2      | infection   | 1 - aOR  |                                | NA    | NA     | NA    | >51   |
| Altarawneh H <sup>45</sup>   | test-negative case-control | All ages | Qatar   | mixed variant                     | Omicron BA.4/BA.5 | infection   | 1 - OR   | Age, sex, and other covariates | 0.286 | 0.118  | 0.422 | NA    |
|                              |                            |          |         | mixed variant                     | Omicron BA.4/BA.5 | Symptomatic | 1 - OR   |                                | 0.149 | -0.475 | 0.509 | NA    |
|                              |                            |          |         | Omicron (unspecified sub-lineage) | Omicron BA.4/BA.5 | infection   | 1 - OR   |                                | 0.797 | 0.744  | 0.84  | NA    |

|                              |                      |                       |           |                                   |                   |             |         |                                |       |       |       |       |
|------------------------------|----------------------|-----------------------|-----------|-----------------------------------|-------------------|-------------|---------|--------------------------------|-------|-------|-------|-------|
|                              |                      |                       |           | Omicron (unspecified sub-lineage) | Omicron BA.4/BA.5 | Symptomatic | 1 - OR  |                                | 0.761 | 0.549 | 0.873 | NA    |
| Abu-Raddad LJ <sup>46</sup>  | retrospective cohort | All ages              | Qatar     | Ancestral                         | Alpha             | infection   | 1 - IRR | No adjustment                  | 0.975 | 0.957 | 0.986 | NA    |
| Bertollini R <sup>47</sup>   | retrospective cohort | 33*                   | Qatar     | mixed variant                     | mixed variant     | infection   | 1 - RR  | Age, sex, and other covariates | 0.74  | 0.66  | 0.79  | NA    |
| Chemaiteilly H <sup>48</sup> | retrospective cohort | All ages              | Qatar     | mixed variant                     | mixed variant     | infection   | 1 - aHR | Age, sex, and other covariates | 0.806 | 0.778 | 0.831 | 0-16  |
|                              |                      |                       | Qatar     | mixed variant                     | mixed variant     | infection   | 1 - aHR |                                | 0.863 | 0.838 | 0.887 | 17-20 |
|                              |                      |                       | Qatar     | mixed variant                     | mixed variant     | infection   | 1 - aHR |                                | 0.887 | 0.862 | 0.909 | 21-24 |
|                              |                      |                       | Qatar     | mixed variant                     | mixed variant     | infection   | 1 - aHR |                                | 0.905 | 0.881 | 0.926 | 25-28 |
|                              |                      |                       | Qatar     | mixed variant                     | mixed variant     | infection   | 1 - aHR |                                | 0.9   | 0.877 | 0.922 | 29-32 |
|                              |                      |                       | Qatar     | mixed variant                     | mixed variant     | infection   | 1 - aHR |                                | 0.888 | 0.866 | 0.909 | 33-36 |
|                              |                      |                       | Qatar     | mixed variant                     | mixed variant     | infection   | 1 - aHR |                                | 0.864 | 0.838 | 0.885 | 37-40 |
|                              |                      |                       | Qatar     | mixed variant                     | mixed variant     | infection   | 1 - aHR |                                | 0.824 | 0.795 | 0.851 | 41-44 |
|                              |                      |                       | Qatar     | mixed variant                     | mixed variant     | infection   | 1 - aHR |                                | 0.754 | 0.704 | 0.799 | 45-48 |
|                              |                      |                       | Qatar     | mixed variant                     | mixed variant     | infection   | 1 - aHR |                                | 0.785 | 0.696 | 0.851 | 49-52 |
|                              |                      |                       | Qatar     | mixed variant                     | mixed variant     | infection   | 1 - aHR |                                | 0.755 | 0.577 | 0.862 | 53-56 |
|                              |                      |                       | Qatar     | mixed variant                     | mixed variant     | infection   | 1 - aHR |                                | 0.751 | 0.538 | 0.87  | 57-60 |
|                              |                      |                       | Qatar     | mixed variant                     | mixed variant     | infection   | 1 - aHR |                                | 0.716 | 0.422 | 0.862 | >60   |
| Qatar                        | Ancestral            | Omicron (unspecified) | infection | 1 - aHR                           | 0.381             | 0.356       | 0.406   | 48*                            |       |       |       |       |



|  |  |       |                  |                                   |                         |         |       |       |       |       |
|--|--|-------|------------------|-----------------------------------|-------------------------|---------|-------|-------|-------|-------|
|  |  |       | ied sub-lineage) |                                   |                         |         |       |       |       |       |
|  |  | Qatar | Ancestral        | Omicron (unspecified sub-lineage) | infection               | 1 - aHR | 0.484 | 0.46  | 0.507 | 46*   |
|  |  | Qatar | Ancestral        | Omicron (unspecified sub-lineage) | infection               | 1 - aHR | 0.519 | 0.488 | 0.545 | 62*   |
|  |  | Qatar | Alpha            | Omicron (unspecified sub-lineage) | infection               | 1 - aHR | 0.17  | 0.146 | 0.193 | 32*   |
|  |  | Qatar | Beta             | Omicron (unspecified sub-lineage) | infection               | 1 - aHR | 0.317 | 0.297 | 0.34  | 24*   |
|  |  | Qatar | Delta            | Omicron (unspecified sub-lineage) | infection               | 1 - aHR | 0.571 | 0.552 | 0.598 | 8*    |
|  |  | Qatar | mixed variant    | mixed variant                     | hospitalisation & death | 1 - aHR | 0.934 | 0.783 | 0.982 | 0-16  |
|  |  | Qatar | mixed variant    | mixed variant                     | hospitalisation & death | 1 - aHR | 0.99  | 0.904 | 0.99  | 17-20 |
|  |  | Qatar | mixed variant    | mixed variant                     | hospitalisation & death | 1 - aHR | 0.99  | 0.904 | 0.99  | 21-24 |
|  |  | Qatar | mixed variant    | mixed variant                     | hospitalisation & death | 1 - aHR | 0.943 | 0.567 | 0.996 | 25-28 |
|  |  | Qatar | mixed variant    | mixed variant                     | hospitalisation & death | 1 - aHR | 0.99  | 0.902 | 0.99  | 29-32 |
|  |  | Qatar | mixed variant    | mixed variant                     | hospitalisation & death | 1 - aHR | 0.942 | 0.81  | 0.985 | 33-36 |

|                             |                      |          |         |               |                                   |                         |         |                                |       |       |       |       |
|-----------------------------|----------------------|----------|---------|---------------|-----------------------------------|-------------------------|---------|--------------------------------|-------|-------|-------|-------|
|                             |                      |          | Qatar   | mixed variant | mixed variant                     | hospitalisation & death | 1 - aHR |                                | 0.981 | 0.859 | 0.99  | 37-40 |
|                             |                      |          | Qatar   | mixed variant | mixed variant                     | hospitalisation & death | 1 - aHR |                                | 0.98  | 0.852 | 0.99  | 41-44 |
|                             |                      |          | Qatar   | mixed variant | mixed variant                     | hospitalisation & death | 1 - aHR |                                | 0.99  | 0.835 | 0.99  | 45-48 |
|                             |                      |          | Qatar   | mixed variant | mixed variant                     | hospitalisation & death | 1 - aHR |                                | 0.99  | 0     | 0.99  | 49-52 |
|                             |                      |          | Qatar   | mixed variant | mixed variant                     | hospitalisation & death | 1 - aHR |                                | 0.952 | 0.516 | 0.999 | 53-62 |
| Vicentini M <sup>49</sup>   | retrospective cohort | All ages | Italy   | Ancestral     | mixed variant                     | infection               | 1 - aHR | Age, sex, and other covariates | 0.91  | 0.89  | 0.92  | NA    |
|                             |                      |          | Italy   | Alpha         | mixed variant                     | infection               | 1 - aHR |                                | 0.93  | 0.91  | 0.95  | NA    |
|                             |                      |          | Italy   | Delta         | mixed variant                     | infection               | 1 - aHR |                                | 0.97  | 0.88  | 0.99  | NA    |
|                             |                      |          | Italy   | Ancestral     | Omicron (unspecified sub-lineage) | infection               | 1 - aHR |                                | 0.51  | 0.49  | 0.54  | NA    |
|                             |                      |          | Italy   | Alpha         | Omicron (unspecified sub-lineage) | infection               | 1 - aHR |                                | 0.62  | 0.64  | 0.6   | NA    |
|                             |                      |          | Italy   | Delta         | Omicron (unspecified sub-lineage) | infection               | 1 - aHR |                                | 0.63  | 0.58  | 0.67  | NA    |
| Abu-Raddad LJ <sup>50</sup> | retrospective cohort | All ages | Qatar   | mixed variant | mixed variant                     | hospitalisation & death | 1 - aOR | Age, sex, and other covariates | 0.9   | 0.75  | 0.97  | NA    |
| Michlmayr D <sup>51</sup>   | retrospective cohort | >2       | Denmark | mixed variant | Alpha                             | infection               | 1 - aHR | Age, sex, and other covariates | 0.852 | 0.837 | 0.866 | NA    |
|                             |                      |          |         | mixed variant | Delta                             | infection               | 1 - aHR |                                | 0.821 | 0.81  | 0.831 | NA    |

|  |  |  |  |               |                                   |                 |         |  |       |       |       |       |
|--|--|--|--|---------------|-----------------------------------|-----------------|---------|--|-------|-------|-------|-------|
|  |  |  |  | mixed variant | Omicron (unspecified sub-lineage) | infection       | 1 - aHR |  | 0.334 | 0.327 | 0.342 | NA    |
|  |  |  |  | mixed variant | Alpha                             | Symptomatic     | 1 - aHR |  | 0.908 | 0.891 | 0.922 | NA    |
|  |  |  |  | mixed variant | Delta                             | Symptomatic     | 1 - aHR |  | 0.85  | 0.838 | 0.862 | NA    |
|  |  |  |  | mixed variant | Omicron (unspecified sub-lineage) | Symptomatic     | 1 - aHR |  | 0.39  | 0.371 | 0.409 | NA    |
|  |  |  |  | mixed variant | Alpha                             | hospitalisation | 1 - aHR |  | 0.866 | 0.463 | 0.967 | NA    |
|  |  |  |  | mixed variant | Delta                             | hospitalisation | 1 - aHR |  | 0.972 | 0.89  | 0.993 | NA    |
|  |  |  |  | mixed variant | Omicron (unspecified sub-lineage) | hospitalisation | 1 - aHR |  | 0.698 | 0.515 | 0.812 | NA    |
|  |  |  |  | mixed variant | Alpha                             | infection       | 1 - aHR |  | 0.867 | 0.849 | 0.883 | 12-25 |
|  |  |  |  | mixed variant | Alpha                             | infection       | 1 - aHR |  | 0.833 | 0.801 | 0.86  | 26-38 |
|  |  |  |  | mixed variant | Alpha                             | infection       | 1 - aHR |  | 0.702 | 0.568 | 0.794 | 39-51 |
|  |  |  |  | mixed variant | Alpha                             | infection       | 1 - aHR |  | 0.864 | 0.761 | 0.923 | >51   |
|  |  |  |  | mixed variant | Delta                             | infection       | 1 - aHR |  | 0.913 | 0.897 | 0.927 | 12-25 |
|  |  |  |  | mixed variant | Delta                             | infection       | 1 - aHR |  | 0.84  | 0.822 | 0.856 | 26-38 |
|  |  |  |  | mixed variant | Delta                             | infection       | 1 - aHR |  | 0.767 | 0.746 | 0.787 | 39-51 |
|  |  |  |  | mixed variant | Delta                             | infection       | 1 - aHR |  | 0.714 | 0.669 | 0.753 | >51   |
|  |  |  |  | mixed variant | Omicron (unspecified sub-lineage) | infection       | 1 - aHR |  | 0.51  | 0.501 | 0.52  | 12-25 |

|  |  |  |  |               |                                   |             |         |  |       |       |       |       |
|--|--|--|--|---------------|-----------------------------------|-------------|---------|--|-------|-------|-------|-------|
|  |  |  |  |               | ied sub-lineage)                  |             |         |  |       |       |       |       |
|  |  |  |  | mixed variant | Omicron (unspecified sub-lineage) | infection   | 1 - aHR |  | 0.254 | 0.233 | 0.273 | 26-38 |
|  |  |  |  | mixed variant | Omicron (unspecified sub-lineage) | infection   | 1 - aHR |  | 0.251 | 0.231 | 0.271 | 39-51 |
|  |  |  |  | mixed variant | Omicron (unspecified sub-lineage) | infection   | 1 - aHR |  | 0.19  | 0.172 | 0.205 | >51   |
|  |  |  |  | mixed variant | Alpha                             | Symptomatic | 1 - aHR |  | 0.926 | 0.907 | 0.94  | 12-25 |
|  |  |  |  | mixed variant | Alpha                             | Symptomatic | 1 - aHR |  | 0.89  | 0.856 | 0.916 | 26-38 |
|  |  |  |  | mixed variant | Alpha                             | Symptomatic | 1 - aHR |  | 0.72  | 0.546 | 0.827 | 39-51 |
|  |  |  |  | mixed variant | Alpha                             | Symptomatic | 1 - aHR |  | 0.932 | 0.819 | 0.975 | >51   |
|  |  |  |  | mixed variant | Delta                             | Symptomatic | 1 - aHR |  | 0.931 | 0.912 | 0.945 | 12-25 |
|  |  |  |  | mixed variant | Delta                             | Symptomatic | 1 - aHR |  | 0.872 | 0.853 | 0.89  | 26-38 |
|  |  |  |  | mixed variant | Delta                             | Symptomatic | 1 - aHR |  | 0.8   | 0.774 | 0.822 | 39-51 |
|  |  |  |  | mixed variant | Delta                             | Symptomatic | 1 - aHR |  | 0.747 | 0.694 | 0.79  | >51   |
|  |  |  |  | mixed variant | Omicron (unspecified sub-lineage) | Symptomatic | 1 - aHR |  | 0.551 | 0.533 | 0.568 | 12-25 |
|  |  |  |  | mixed variant | Omicron (unspecified sub-lineage) | Symptomatic | 1 - aHR |  | 0.311 | 0.279 | 0.34  | 26-38 |
|  |  |  |  | mixed variant | Omicron (unspecified sub-lineage) | Symptomatic | 1 - aHR |  | 0.314 | 0.284 | 0.343 | 39-51 |

|                          |                      |     |    |               |                                   |                 |         |                                |       |       |       |       |
|--------------------------|----------------------|-----|----|---------------|-----------------------------------|-----------------|---------|--------------------------------|-------|-------|-------|-------|
|                          |                      |     |    |               | ied sub-lineage)                  |                 |         |                                |       |       |       |       |
|                          |                      |     |    | mixed variant | Omicron (unspecified sub-lineage) | Symptomatic     | 1 - aHR |                                | 0.257 | 0.228 | 0.284 | >51   |
| Lacy J <sup>52</sup>     | retrospective cohort | >10 | UK | Ancestral     | mixed variant                     | infection       | 1 - OR  | Age, sex, and other covariates | 0.78  | 0.77  | 0.78  | NA    |
|                          |                      |     |    | Ancestral     | mixed variant                     | Symptomatic     | 1 - OR  |                                | 0.77  | 0.74  | 0.8   | NA    |
|                          |                      |     |    | Ancestral     | mixed variant                     | death           | 1 - aOR |                                | 0.45  | 0.29  | 0.58  | NA    |
| Ridgway JP <sup>53</sup> | retrospective cohort | 40* | US | Ancestral     | mixed variant                     | Symptomatic     | 1 - aHR | Age, sex, and other covariates | 0.85  | 0.82  | 0.87  | NA    |
|                          |                      |     |    | Ancestral     | mixed variant                     | hospitalisation | 1 - aHR |                                | 0.88  | 0.82  | 0.92  | NA    |
|                          |                      |     |    | Ancestral     | mixed variant                     | Symptomatic     | 1 - aHR |                                | 0.85  | 0.79  | 0.9   | 12-14 |
|                          |                      |     |    | Ancestral     | mixed variant                     | Symptomatic     | 1 - aHR |                                | 0.86  | 0.8   | 0.91  | 15-21 |
|                          |                      |     |    | Ancestral     | mixed variant                     | Symptomatic     | 1 - aHR |                                | 0.86  | 0.78  | 0.91  | 22-28 |
|                          |                      |     |    | Ancestral     | mixed variant                     | Symptomatic     | 1 - aHR |                                | 0.88  | 0.8   | 0.95  | 29-35 |
| Spicer KB <sup>54</sup>  | Retrospective cohort | >20 | US | Mixed variant | Mixed variant                     | Infection       | 1 - RR  | No adjustment                  | 0.77  | 0.75  | 0.79  | NA    |
|                          |                      |     |    | Mixed variant | Mixed variant                     | Infection       | 1 - RR  |                                | 0.70  | 0.66  | 0.74  | 12-16 |
|                          |                      |     |    | Mixed variant | Mixed variant                     | Infection       | 1 - RR  |                                | 0.79  | 0.75  | 0.82  | 17-20 |
|                          |                      |     |    | Mixed variant | Mixed variant                     | Infection       | 1 - RR  |                                | 0.81  | 0.78  | 0.85  | 21-24 |
|                          |                      |     |    | Mixed variant | Mixed variant                     | Infection       | 1 - RR  |                                | 0.74  | 0.67  | 0.79  | 25-28 |
|                          |                      |     |    | Mixed variant | Mixed variant                     | Infection       | 1 - RR  |                                | 0.70  | 0.59  | 0.78  | 29-32 |
|                          |                      |     |    | Mixed variant | Mixed variant                     | Infection       | 1 - RR  |                                | 0.79  | 0.65  | 0.88  | 33-36 |

|                           |                            |          |              |                                   |                                   |             |       |                                |       |       |       |       |
|---------------------------|----------------------------|----------|--------------|-----------------------------------|-----------------------------------|-------------|-------|--------------------------------|-------|-------|-------|-------|
| Cohen C <sup>55</sup>     | prospective cohort         | All ages | South Africa | Mixed variant                     | Mixed variant                     | Symptomatic | 1-aOR | Other covariates               | 0.6   | 0.1   | 0.8   | NA    |
| Sun K <sup>56</sup>       | prospective cohort         | All ages | South Africa | Mixed variant                     | Mixed variant                     | Infection   | 1-aRR | Other covariates               | 0.92  | 0.84  | 0.96  | 12-24 |
|                           |                            |          |              | Mixed variant                     | Mixed variant                     | Infection   | 1-aRR |                                | 0.87  | 0.78  | 0.92  | 25-36 |
| Powell A <sup>57</sup>    | test-negative case-control | 12-17    | UK           | Ancestral                         | Delta                             | Symptomatic | 1-aOR | Age, sex, and other covariates | 0.876 | 0.868 | 0.884 | NA    |
|                           |                            |          |              | Alpha                             | Delta                             | Symptomatic | 1-aOR |                                | 0.861 | 0.854 | 0.868 | NA    |
|                           |                            |          |              | Delta                             | Delta                             | Symptomatic | 1-aOR |                                | 0.923 | 0.917 | 0.929 | NA    |
|                           |                            |          |              | Ancestral                         | Omicron (unspecified sub-lineage) | Symptomatic | 1-aOR |                                | 0.327 | 0.277 | 0.374 | NA    |
|                           |                            |          |              | Alpha                             | Omicron (unspecified sub-lineage) | Symptomatic | 1-aOR |                                | 0.366 | 0.329 | 0.401 | NA    |
|                           |                            |          |              | Delta                             | Omicron (unspecified sub-lineage) | Symptomatic | 1-aOR |                                | 0.524 | 0.509 | 0.538 | NA    |
|                           |                            |          |              | Omicron (unspecified sub-lineage) | Omicron (unspecified sub-lineage) | Symptomatic | 1-aOR |                                | 0.593 | 0.467 | 0.69  | NA    |
|                           |                            |          |              |                                   |                                   |             |       |                                |       |       |       |       |
| Murugesan M <sup>58</sup> | retrospective cohort       | >18      | India        | mixed variant                     | mixed variant                     | Symptomatic | 1-HR  | Age, sex, and other covariates | 0.86  | 0.767 | 0.916 | NA    |
| Dhumal S <sup>59</sup>    | retrospective cohort       | 34*      | India        | mixed variant                     | mixed variant                     | infection   | 1-aHR | Age, sex, and other covariates | 0.72  | 0.08  | 0.91  | NA    |

|                          |                            |          |           |               |                                   |             |       |                                |       |      |      |       |
|--------------------------|----------------------------|----------|-----------|---------------|-----------------------------------|-------------|-------|--------------------------------|-------|------|------|-------|
| Corrao G <sup>60</sup>   | test-negative case-control | >18      | Italy     | mixed variant | mixed variant                     | Symptomatic | 1-aOR | Other covariates               | 0.91  | 0.85 | 0.95 | NA    |
| Smolenov J <sup>61</sup> | clinical trial             | >18      | US        | mixed variant | mixed variant                     | infection   | 1-IRR | No adjustment                  | 0.832 | 0.78 | 0.87 | NA    |
|                          |                            |          |           | mixed variant | Alpha                             | infection   | 1-IRR |                                | 0.99  | 0.80 | 0.99 | NA    |
|                          |                            |          |           | mixed variant | Beta                              | infection   | 1-IRR |                                | 0.722 | 0.33 | 0.89 | NA    |
|                          |                            |          |           | mixed variant | Delta                             | infection   | 1-IRR |                                | 0.72  | 0.61 | 0.87 | NA    |
| Reynolds S <sup>62</sup> | retrospective cohort       | All ages | US        | Ancestral     | Ancestral                         | Infection   | 1-aHR | Age, sex, and other covariates | 0.87  | 0.87 | 0.87 | NA    |
|                          |                            |          |           | Ancestral     | Ancestral                         | Infection   | 1-aHR |                                | 0.88  | 0.87 | 0.88 | 24-32 |
|                          |                            |          |           | Ancestral     | Ancestral                         | Infection   | 1-aHR |                                | 0.83  | 0.82 | 0.85 | 33-40 |
|                          |                            |          |           | Ancestral     | Ancestral                         | Infection   | 1-aHR |                                | 0.85  | 0.82 | 0.87 | 41-48 |
| Narrain F <sup>63</sup>  | retrospective cohort       | >18      | UK        | Ancestral     | Ancestral                         | Infection   | 1-OR  | No adjustment                  | 0.973 | 0.80 | 0.99 | NA    |
| Kubale J <sup>64</sup>   | prospective cohort         | 0-4      | Nicaragua | mixed variant | mixed variant                     | Symptomatic | 1-RR  | No adjustment                  | 0.61  | 0.2  | 0.8  | NA    |
|                          |                            | 5-9      |           | mixed variant | mixed variant                     | Symptomatic | 1-RR  |                                | 0.64  | 0.2  | 0.7  | Na    |
|                          |                            | 10-14    |           | mixed variant | mixed variant                     | Symptomatic | 1-RR  |                                | 0.49  | 0.3  | 0.9  | NA    |
| Rothberg M <sup>65</sup> | retrospective cohort       | All ages | US        | Ancestral     | Omicron (unspecified sub-lineage) | infection   | 1-aRR | Age, sex, and other covariates | 0.18  | 0.13 | 0.22 | NA    |
|                          |                            |          |           | Alpha         | Omicron (unspecified sub-lineage) | infection   | 1-aRR |                                | 0.381 | 0.25 | 0.48 | NA    |
|                          |                            |          |           | Delta         | Omicron (unspecified sub-lineage) | infection   | 1-aRR |                                | 0.692 | 0.63 | 0.74 | NA    |

|                            |                          |     |                 |                  | ied sub-<br>lineage) |           |       |                                      |      |      |      |       |
|----------------------------|--------------------------|-----|-----------------|------------------|----------------------|-----------|-------|--------------------------------------|------|------|------|-------|
| Andeweg<br>S <sup>66</sup> | retrospecti<br>ve cohort | >11 | Netherla<br>nds | mixed<br>variant | Delta                | infection | 1-aOR | Age, sex,<br>and other<br>covariates | 0.79 | 0.77 | 0.81 | NA    |
|                            |                          |     |                 | mixed<br>variant | Delta                | infection | 1-aOR |                                      | 0.7  | 0.5  | 0.83 | 4-8   |
|                            |                          |     |                 | mixed<br>variant | Delta                | infection | 1-aOR |                                      | 0.95 | 0.85 | 0.99 | 9-12  |
|                            |                          |     |                 | mixed<br>variant | Delta                | infection | 1-aOR |                                      | 0.93 | 0.84 | 0.97 | 13-17 |
|                            |                          |     |                 | mixed<br>variant | Delta                | infection | 1-aOR |                                      | 0.92 | 0.86 | 0.95 | 18-21 |
|                            |                          |     |                 | mixed<br>variant | Delta                | infection | 1-aOR |                                      | 0.86 | 0.76 | 0.91 | 22-25 |
|                            |                          |     |                 | mixed<br>variant | Delta                | infection | 1-aOR |                                      | 0.84 | 0.74 | 0.9  | 26-29 |
|                            |                          |     |                 | mixed<br>variant | Delta                | infection | 1-aOR |                                      | 0.76 | 0.73 | 0.79 | 30-34 |
|                            |                          |     |                 | mixed<br>variant | Omicron<br>BA.1      | infection | 1-aOR |                                      | 0.46 | 0.44 | 0.48 | NA    |
|                            |                          |     |                 | mixed<br>variant | Omicron<br>BA.1      | infection | 1-aOR |                                      | 0.73 | 0.66 | 0.79 | 4-8   |
|                            |                          |     |                 | mixed<br>variant | Omicron<br>BA.1      | infection | 1-aOR |                                      | 0.63 | 0.58 | 0.67 | 9-12  |
|                            |                          |     |                 | mixed<br>variant | Omicron<br>BA.1      | infection | 1-aOR |                                      | 0.57 | 0.52 | 0.62 | 13-17 |
|                            |                          |     |                 | mixed<br>variant | Omicron<br>BA.1      | infection | 1-aOR |                                      | 0.55 | 0.46 | 0.62 | 18-21 |
|                            |                          |     |                 | mixed<br>variant | Omicron<br>BA.1      | infection | 1-aOR |                                      | 0.53 | 0.43 | 0.6  | 22-25 |
|                            |                          |     |                 | mixed<br>variant | Omicron<br>BA.1      | infection | 1-aOR |                                      | 0.52 | 0.45 | 0.58 | 26-29 |
|                            |                          |     |                 | mixed<br>variant | Omicron<br>BA.1      | infection | 1-aOR |                                      | 0.34 | 0.31 | 0.38 | 30-34 |
|                            |                          |     |                 | mixed<br>variant | Omicron<br>BA.2      | infection | 1-aOR |                                      | 0.47 | 0.44 | 0.5  | NA    |



|  |  |  |  |               |              |           |       |  |      |      |      |       |
|--|--|--|--|---------------|--------------|-----------|-------|--|------|------|------|-------|
|  |  |  |  | mixed variant | Omicron BA.2 | infection | 1-aOR |  | 0.76 | 0.68 | 0.82 | 4-8   |
|  |  |  |  | mixed variant | Omicron BA.2 | infection | 1-aOR |  | 0.56 | 0.48 | 0.62 | 9-12  |
|  |  |  |  | mixed variant | Omicron BA.2 | infection | 1-aOR |  | 0.5  | 0.43 | 0.56 | 13-17 |
|  |  |  |  | mixed variant | Omicron BA.2 | infection | 1-aOR |  | 0.57 | 0.49 | 0.64 | 18-21 |
|  |  |  |  | mixed variant | Omicron BA.2 | infection | 1-aOR |  | 0.5  | 0.36 | 0.61 | 22-25 |
|  |  |  |  | mixed variant | Omicron BA.2 | infection | 1-aOR |  | 0.53 | 0.42 | 0.62 | 26-29 |
|  |  |  |  | mixed variant | Omicron BA.2 | infection | 1-aOR |  | 0.38 | 0.34 | 0.43 | 30-34 |
|  |  |  |  | mixed variant | Delta        | infection | 1-aOR |  | 0.8  | 0.78 | 0.82 | NA    |
|  |  |  |  | mixed variant | Delta        | infection | 1-aOR |  | 0.7  | 0.48 | 0.83 | 4-8   |
|  |  |  |  | mixed variant | Delta        | infection | 1-aOR |  | 0.98 | 0.86 | 0.99 | 9-12  |
|  |  |  |  | mixed variant | Delta        | infection | 1-aOR |  | 0.94 | 0.83 | 0.98 | 13-17 |
|  |  |  |  | mixed variant | Delta        | infection | 1-aOR |  | 0.92 | 0.86 | 0.95 | 18-21 |
|  |  |  |  | mixed variant | Delta        | infection | 1-aOR |  | 0.84 | 0.73 | 0.9  | 22-25 |
|  |  |  |  | mixed variant | Delta        | infection | 1-aOR |  | 0.88 | 0.78 | 0.93 | 26-29 |
|  |  |  |  | mixed variant | Delta        | infection | 1-aOR |  | 0.77 | 0.74 | 0.8  | 30-34 |
|  |  |  |  | mixed variant | Omicron BA.1 | infection | 1-aOR |  | 0.47 | 0.44 | 0.49 | NA    |
|  |  |  |  | mixed variant | Omicron BA.1 | infection | 1-aOR |  | 0.73 | 0.66 | 0.8  | 4-8   |
|  |  |  |  | mixed variant | Omicron BA.1 | infection | 1-aOR |  | 0.62 | 0.57 | 0.67 | 9-12  |

|  |  |  |  |               |              |           |       |  |      |      |      |       |
|--|--|--|--|---------------|--------------|-----------|-------|--|------|------|------|-------|
|  |  |  |  | mixed variant | Omicron BA.1 | infection | 1-aOR |  | 0.55 | 0.48 | 0.6  | 13-17 |
|  |  |  |  | mixed variant | Omicron BA.1 | infection | 1-aOR |  | 0.51 | 0.41 | 0.6  | 18-21 |
|  |  |  |  | mixed variant | Omicron BA.1 | infection | 1-aOR |  | 0.54 | 0.44 | 0.62 | 22-25 |
|  |  |  |  | mixed variant | Omicron BA.1 | infection | 1-aOR |  | 0.53 | 0.45 | 0.59 | 26-29 |
|  |  |  |  | mixed variant | Omicron BA.1 | infection | 1-aOR |  | 0.37 | 0.33 | 0.4  | 30-34 |
|  |  |  |  | mixed variant | Omicron BA.2 | infection | 1-aOR |  | 0.49 | 0.45 | 0.52 | NA    |
|  |  |  |  | mixed variant | Omicron BA.2 | infection | 1-aOR |  | 0.76 | 0.69 | 0.82 | 4-8   |
|  |  |  |  | mixed variant | Omicron BA.2 | infection | 1-aOR |  | 0.57 | 0.49 | 0.63 | 9-12  |
|  |  |  |  | mixed variant | Omicron BA.2 | infection | 1-aOR |  | 0.5  | 0.43 | 0.56 | 13-17 |
|  |  |  |  | mixed variant | Omicron BA.2 | infection | 1-aOR |  | 0.58 | 0.5  | 0.66 | 18-21 |
|  |  |  |  | mixed variant | Omicron BA.2 | infection | 1-aOR |  | 0.55 | 0.41 | 0.65 | 22-25 |
|  |  |  |  | mixed variant | Omicron BA.2 | infection | 1-aOR |  | 0.52 | 0.4  | 0.62 | 26-29 |
|  |  |  |  | mixed variant | Omicron BA.2 | infection | 1-aOR |  | 0.4  | 0.35 | 0.44 | 30-34 |

CI = Confidence Interval; NA = not available; \* indicates extracted data point is median age

**Table S2 Protection against reinfection, symptomatic, and severe disease by time since infection**

| Week after infection | Protection against ancestral, Alpha, and Delta reinfection |             |             | Protection against Omicron BA.1 reinfection |             |             | Protection against Omicron BA.2 reinfection |             |             | Protection against ancestral, Alpha, and Delta symptomatic disease |             |             | Protection against BA.1 symptomatic disease |             |             | Protection against ancestral, Alpha, and Delta severe disease |             |             | Protection against BA.1 severe disease |             |             |
|----------------------|------------------------------------------------------------|-------------|-------------|---------------------------------------------|-------------|-------------|---------------------------------------------|-------------|-------------|--------------------------------------------------------------------|-------------|-------------|---------------------------------------------|-------------|-------------|---------------------------------------------------------------|-------------|-------------|----------------------------------------|-------------|-------------|
|                      | Estimate                                                   | Lower bound | Upper bound | Estimate                                    | Lower bound | Upper bound | Estimate                                    | Lower bound | Upper bound | Estimate                                                           | Lower bound | Upper bound | Estimate                                    | Lower bound | Upper bound | Estimate                                                      | Lower bound | Upper bound | Estimate                               | Lower bound | Upper bound |
| 0                    | 85.2%                                                      | 61.0%       | 96.0%       | 77.5%                                       | 66.1%       | 86.1%       | 96.9%                                       | 83.6%       | 99.0%       | 90.3%                                                              | 80.4%       | 98.4%       | 89.2%                                       | 67.1%       | 95.8%       | 96.7%                                                         | 90.9%       | 100.0%      | 88.9%                                  | 86.9%       | 99.9%       |
| 0.1                  | 85.2%                                                      | 61.0%       | 96.0%       | 77.4%                                       | 66.0%       | 86.1%       | 96.8%                                       | 83.4%       | 98.9%       | 90.3%                                                              | 80.4%       | 98.4%       | 89.0%                                       | 67.0%       | 95.7%       | 96.7%                                                         | 90.9%       | 100.0%      | 88.9%                                  | 86.9%       | 99.9%       |
| 0.2                  | 85.2%                                                      | 61.0%       | 96.0%       | 77.4%                                       | 65.9%       | 86.0%       | 96.6%                                       | 83.3%       | 98.9%       | 90.3%                                                              | 80.4%       | 98.3%       | 88.8%                                       | 67.0%       | 95.6%       | 96.7%                                                         | 91.1%       | 100.0%      | 88.9%                                  | 86.9%       | 99.9%       |
| 0.3                  | 85.2%                                                      | 61.0%       | 96.0%       | 77.3%                                       | 65.8%       | 86.0%       | 96.5%                                       | 83.1%       | 98.8%       | 90.3%                                                              | 80.4%       | 98.3%       | 88.6%                                       | 66.9%       | 95.5%       | 96.7%                                                         | 91.1%       | 100.0%      | 88.9%                                  | 86.9%       | 99.9%       |
| 0.4                  | 85.2%                                                      | 61.0%       | 96.0%       | 77.2%                                       | 65.7%       | 85.9%       | 96.3%                                       | 82.8%       | 98.7%       | 90.3%                                                              | 80.4%       | 98.2%       | 88.4%                                       | 66.7%       | 95.4%       | 96.8%                                                         | 91.1%       | 100.0%      | 88.9%                                  | 86.9%       | 99.9%       |
| 0.5                  | 85.2%                                                      | 61.0%       | 96.0%       | 77.1%                                       | 65.6%       | 85.9%       | 96.1%                                       | 82.6%       | 98.6%       | 90.3%                                                              | 80.3%       | 98.2%       | 88.2%                                       | 66.3%       | 95.2%       | 96.8%                                                         | 91.1%       | 100.0%      | 88.9%                                  | 86.9%       | 99.9%       |
| 0.6                  | 85.2%                                                      | 61.0%       | 96.0%       | 77.0%                                       | 65.5%       | 85.8%       | 96.0%                                       | 82.3%       | 98.5%       | 90.3%                                                              | 80.3%       | 98.2%       | 88.0%                                       | 65.9%       | 95.1%       | 96.8%                                                         | 91.2%       | 100.0%      | 88.9%                                  | 86.9%       | 99.9%       |
| 0.7                  | 85.2%                                                      | 61.0%       | 96.0%       | 76.9%                                       | 65.4%       | 85.8%       | 95.8%                                       | 82.1%       | 98.4%       | 90.3%                                                              | 80.3%       | 98.1%       | 87.7%                                       | 65.9%       | 94.9%       | 96.9%                                                         | 91.2%       | 100.0%      | 88.9%                                  | 86.9%       | 99.9%       |
| 0.8                  | 85.2%                                                      | 61.0%       | 96.0%       | 76.8%                                       | 65.2%       | 85.7%       | 95.6%                                       | 81.8%       | 98.3%       | 90.3%                                                              | 80.2%       | 98.1%       | 87.5%                                       | 65.8%       | 94.7%       | 96.9%                                                         | 91.2%       | 100.0%      | 88.9%                                  | 86.9%       | 99.9%       |
| 0.9                  | 85.2%                                                      | 60.9%       | 96.0%       | 76.8%                                       | 65.1%       | 85.6%       | 95.4%                                       | 81.6%       | 98.2%       | 90.3%                                                              | 80.2%       | 98.1%       | 87.3%                                       | 65.6%       | 94.5%       | 96.9%                                                         | 91.2%       | 100.0%      | 88.9%                                  | 86.9%       | 99.8%       |
| 1                    | 85.2%                                                      | 60.9%       | 96.0%       | 76.7%                                       | 65.0%       | 85.6%       | 95.2%                                       | 81.3%       | 98.1%       | 90.3%                                                              | 80.1%       | 98.0%       | 87.1%                                       | 65.5%       | 94.4%       | 96.9%                                                         | 91.2%       | 100.0%      | 88.9%                                  | 87.0%       | 99.8%       |
| 1.1                  | 85.2%                                                      | 60.9%       | 96.0%       | 76.6%                                       | 64.9%       | 85.5%       | 94.9%                                       | 81.0%       | 98.0%       | 90.3%                                                              | 80.1%       | 98.0%       | 86.9%                                       | 65.4%       | 94.3%       | 97.0%                                                         | 91.2%       | 100.0%      | 88.9%                                  | 87.0%       | 99.8%       |
| 1.2                  | 85.2%                                                      | 60.9%       | 96.0%       | 76.5%                                       | 64.8%       | 85.5%       | 94.7%                                       | 80.8%       | 97.9%       | 90.3%                                                              | 80.1%       | 97.9%       | 86.6%                                       | 65.3%       | 94.3%       | 97.0%                                                         | 91.2%       | 100.0%      | 88.9%                                  | 87.0%       | 99.8%       |
| 1.3                  | 85.2%                                                      | 60.9%       | 96.0%       | 76.4%                                       | 64.7%       | 85.4%       | 94.5%                                       | 80.5%       | 97.7%       | 90.3%                                                              | 80.0%       | 97.9%       | 86.4%                                       | 65.2%       | 94.1%       | 97.0%                                                         | 91.3%       | 100.0%      | 88.9%                                  | 87.0%       | 99.8%       |
| 1.4                  | 85.2%                                                      | 60.8%       | 96.0%       | 76.3%                                       | 64.5%       | 85.4%       | 94.3%                                       | 80.3%       | 97.6%       | 90.3%                                                              | 80.0%       | 97.9%       | 86.2%                                       | 65.2%       | 93.9%       | 97.0%                                                         | 91.3%       | 100.0%      | 88.9%                                  | 87.0%       | 99.8%       |
| 1.5                  | 85.2%                                                      | 60.8%       | 96.0%       | 76.3%                                       | 64.4%       | 85.3%       | 94.0%                                       | 80.0%       | 97.5%       | 90.3%                                                              | 80.0%       | 97.8%       | 85.9%                                       | 65.1%       | 93.7%       | 97.1%                                                         | 91.3%       | 100.0%      | 88.9%                                  | 87.0%       | 99.8%       |
| 1.6                  | 85.2%                                                      | 60.8%       | 96.0%       | 76.2%                                       | 64.3%       | 85.3%       | 93.8%                                       | 79.7%       | 97.3%       | 90.3%                                                              | 80.0%       | 97.8%       | 85.7%                                       | 65.0%       | 93.6%       | 97.1%                                                         | 91.3%       | 100.0%      | 88.9%                                  | 87.0%       | 99.8%       |
| 1.7                  | 85.2%                                                      | 60.8%       | 96.0%       | 76.1%                                       | 64.2%       | 85.2%       | 93.5%                                       | 79.5%       | 97.2%       | 90.3%                                                              | 80.0%       | 97.7%       | 85.5%                                       | 65.0%       | 93.4%       | 97.1%                                                         | 91.3%       | 100.0%      | 88.9%                                  | 87.0%       | 99.8%       |
| 1.8                  | 85.2%                                                      | 60.8%       | 96.0%       | 76.0%                                       | 64.1%       | 85.2%       | 93.2%                                       | 79.2%       | 97.0%       | 90.3%                                                              | 80.0%       | 97.7%       | 85.2%                                       | 64.9%       | 93.3%       | 97.1%                                                         | 91.3%       | 100.0%      | 88.9%                                  | 87.0%       | 99.8%       |
| 1.9                  | 85.2%                                                      | 60.8%       | 96.0%       | 75.9%                                       | 64.0%       | 85.1%       | 93.0%                                       | 78.9%       | 96.8%       | 90.3%                                                              | 80.0%       | 97.7%       | 85.0%                                       | 64.8%       | 93.1%       | 97.2%                                                         | 91.4%       | 100.0%      | 88.9%                                  | 87.0%       | 99.8%       |
| 2                    | 85.2%                                                      | 60.8%       | 96.0%       | 75.8%                                       | 63.8%       | 85.0%       | 92.7%                                       | 78.7%       | 96.6%       | 90.3%                                                              | 80.0%       | 97.7%       | 84.7%                                       | 64.7%       | 93.0%       | 97.2%                                                         | 91.4%       | 100.0%      | 88.9%                                  | 87.0%       | 99.8%       |
| 2.1                  | 85.2%                                                      | 60.8%       | 96.0%       | 75.7%                                       | 63.7%       | 85.0%       | 92.4%                                       | 78.4%       | 96.4%       | 90.3%                                                              | 80.0%       | 97.7%       | 84.5%                                       | 64.7%       | 92.9%       | 97.2%                                                         | 91.5%       | 100.0%      | 88.9%                                  | 87.0%       | 99.8%       |
| 2.2                  | 85.2%                                                      | 60.8%       | 96.0%       | 75.6%                                       | 63.6%       | 84.9%       | 92.1%                                       | 78.2%       | 96.2%       | 90.3%                                                              | 80.0%       | 97.7%       | 84.2%                                       | 64.6%       | 92.7%       | 97.2%                                                         | 91.5%       | 100.0%      | 88.9%                                  | 87.0%       | 99.7%       |
| 2.3                  | 85.2%                                                      | 60.8%       | 96.0%       | 75.6%                                       | 63.5%       | 84.9%       | 91.8%                                       | 78.0%       | 96.0%       | 90.3%                                                              | 80.0%       | 97.7%       | 84.0%                                       | 64.2%       | 92.5%       | 97.2%                                                         | 91.5%       | 100.0%      | 88.9%                                  | 87.0%       | 99.7%       |
| 2.4                  | 85.2%                                                      | 60.8%       | 96.0%       | 75.5%                                       | 63.4%       | 84.8%       | 91.5%                                       | 77.8%       | 95.8%       | 90.3%                                                              | 80.0%       | 97.7%       | 83.8%                                       | 63.9%       | 92.3%       | 97.3%                                                         | 91.6%       | 100.0%      | 88.9%                                  | 87.0%       | 99.7%       |
| 2.5                  | 85.2%                                                      | 60.8%       | 96.0%       | 75.4%                                       | 63.3%       | 84.8%       | 91.1%                                       | 77.5%       | 95.6%       | 90.3%                                                              | 80.0%       | 97.6%       | 83.5%                                       | 63.5%       | 92.1%       | 97.3%                                                         | 91.6%       | 100.0%      | 88.9%                                  | 87.0%       | 99.7%       |

|     |       |       |       |       |       |       |       |       |       |       |       |       |       |       |       |       |       |        |       |       |       |
|-----|-------|-------|-------|-------|-------|-------|-------|-------|-------|-------|-------|-------|-------|-------|-------|-------|-------|--------|-------|-------|-------|
| 2.6 | 85.2% | 60.8% | 96.0% | 75.3% | 63.1% | 84.7% | 90.8% | 77.2% | 95.4% | 90.3% | 80.0% | 97.6% | 83.3% | 63.2% | 91.9% | 97.3% | 91.6% | 100.0% | 88.9% | 87.0% | 99.7% |
| 2.7 | 85.2% | 60.8% | 96.0% | 75.2% | 63.0% | 84.6% | 90.5% | 77.0% | 95.1% | 90.3% | 80.0% | 97.5% | 83.0% | 63.1% | 91.7% | 97.3% | 91.7% | 100.0% | 88.9% | 87.0% | 99.7% |
| 2.8 | 85.2% | 60.8% | 96.0% | 75.1% | 62.9% | 84.6% | 90.1% | 76.8% | 94.9% | 90.3% | 80.0% | 97.5% | 82.8% | 63.0% | 91.6% | 97.3% | 91.7% | 100.0% | 88.9% | 87.0% | 99.7% |
| 2.9 | 85.2% | 60.8% | 96.0% | 75.0% | 62.8% | 84.5% | 89.8% | 76.7% | 94.6% | 90.3% | 80.0% | 97.5% | 82.5% | 62.8% | 91.5% | 97.3% | 91.7% | 100.0% | 88.9% | 87.0% | 99.7% |
| 3   | 85.2% | 60.8% | 96.0% | 74.9% | 62.7% | 84.5% | 89.4% | 76.4% | 94.3% | 90.3% | 80.0% | 97.4% | 82.3% | 62.7% | 91.3% | 97.4% | 91.8% | 100.0% | 88.9% | 87.0% | 99.6% |
| 3.1 | 85.2% | 60.8% | 96.0% | 74.8% | 62.5% | 84.4% | 89.0% | 76.1% | 94.0% | 90.3% | 80.0% | 97.4% | 82.0% | 62.5% | 91.2% | 97.4% | 91.8% | 100.0% | 88.9% | 87.0% | 99.6% |
| 3.2 | 85.2% | 60.8% | 96.0% | 74.8% | 62.4% | 84.4% | 88.7% | 75.9% | 93.8% | 90.3% | 80.0% | 97.4% | 81.7% | 62.5% | 91.0% | 97.4% | 91.8% | 100.0% | 88.9% | 87.0% | 99.6% |
| 3.3 | 85.2% | 60.8% | 96.0% | 74.7% | 62.3% | 84.3% | 88.3% | 75.7% | 93.5% | 90.3% | 80.0% | 97.4% | 81.5% | 62.4% | 90.8% | 97.4% | 91.9% | 100.0% | 88.9% | 87.0% | 99.6% |
| 3.4 | 85.2% | 60.8% | 96.0% | 74.6% | 62.2% | 84.2% | 87.9% | 75.5% | 93.1% | 90.3% | 80.0% | 97.4% | 81.2% | 62.3% | 90.7% | 97.4% | 91.9% | 100.0% | 88.9% | 87.0% | 99.6% |
| 3.5 | 85.2% | 60.8% | 96.0% | 74.5% | 62.1% | 84.2% | 87.5% | 75.3% | 92.8% | 90.3% | 80.0% | 97.4% | 81.0% | 62.1% | 90.5% | 97.4% | 91.9% | 100.0% | 88.9% | 87.0% | 99.6% |
| 3.6 | 85.2% | 60.8% | 96.0% | 74.4% | 61.9% | 84.1% | 87.1% | 74.9% | 92.5% | 90.3% | 80.0% | 97.3% | 80.7% | 61.9% | 90.3% | 97.4% | 92.0% | 100.0% | 88.9% | 87.0% | 99.5% |
| 3.7 | 85.2% | 60.8% | 96.0% | 74.3% | 61.8% | 84.1% | 86.7% | 74.7% | 92.2% | 90.3% | 80.0% | 97.3% | 80.5% | 61.7% | 90.2% | 97.5% | 92.0% | 100.0% | 88.9% | 87.0% | 99.5% |
| 3.8 | 85.2% | 60.8% | 96.0% | 74.2% | 61.7% | 84.0% | 86.2% | 74.6% | 91.8% | 90.3% | 80.0% | 97.3% | 80.2% | 61.5% | 90.0% | 97.5% | 92.0% | 100.0% | 88.9% | 87.0% | 99.5% |
| 3.9 | 85.2% | 60.8% | 96.0% | 74.1% | 61.6% | 84.0% | 85.8% | 74.2% | 91.5% | 90.3% | 80.0% | 97.3% | 79.9% | 61.3% | 89.8% | 97.5% | 92.0% | 100.0% | 88.9% | 87.0% | 99.5% |
| 4   | 85.2% | 60.8% | 96.0% | 74.0% | 61.5% | 83.9% | 85.4% | 74.0% | 91.1% | 90.3% | 80.0% | 97.2% | 79.7% | 61.0% | 89.7% | 97.5% | 92.0% | 100.0% | 88.9% | 87.0% | 99.5% |
| 4.1 | 85.2% | 60.8% | 96.0% | 73.9% | 61.3% | 83.8% | 85.0% | 73.7% | 90.7% | 90.3% | 80.0% | 97.2% | 79.4% | 60.7% | 89.5% | 97.5% | 92.0% | 100.0% | 88.9% | 87.0% | 99.5% |
| 4.2 | 85.2% | 60.8% | 96.0% | 73.8% | 61.2% | 83.8% | 84.5% | 73.4% | 90.3% | 90.3% | 80.0% | 97.1% | 79.2% | 60.5% | 89.3% | 97.5% | 92.1% | 100.0% | 88.9% | 87.0% | 99.4% |
| 4.3 | 85.2% | 60.8% | 96.0% | 73.8% | 61.1% | 83.7% | 84.1% | 73.2% | 89.9% | 90.3% | 80.0% | 97.1% | 78.9% | 60.2% | 89.1% | 97.5% | 92.1% | 99.9%  | 88.9% | 87.0% | 99.4% |
| 4.4 | 85.2% | 60.8% | 95.9% | 73.7% | 61.0% | 83.6% | 83.6% | 72.9% | 89.5% | 90.3% | 80.0% | 97.1% | 78.6% | 60.0% | 88.9% | 97.5% | 92.1% | 99.9%  | 88.9% | 87.0% | 99.4% |
| 4.5 | 85.2% | 60.8% | 95.9% | 73.6% | 60.9% | 83.5% | 83.1% | 72.6% | 89.0% | 90.3% | 80.0% | 97.1% | 78.4% | 59.7% | 88.7% | 97.6% | 92.2% | 99.9%  | 88.9% | 87.0% | 99.4% |
| 4.6 | 85.2% | 60.8% | 95.9% | 73.5% | 60.8% | 83.5% | 82.7% | 72.3% | 88.6% | 90.3% | 79.9% | 97.1% | 78.1% | 59.4% | 88.5% | 97.6% | 92.2% | 99.9%  | 88.9% | 87.0% | 99.4% |
| 4.7 | 85.2% | 60.8% | 95.9% | 73.4% | 60.7% | 83.4% | 82.2% | 71.9% | 88.1% | 90.3% | 79.8% | 97.1% | 77.9% | 59.1% | 88.2% | 97.6% | 92.2% | 99.9%  | 88.9% | 87.0% | 99.3% |
| 4.8 | 85.2% | 60.8% | 95.9% | 73.3% | 60.6% | 83.3% | 81.7% | 71.6% | 87.6% | 90.3% | 79.7% | 97.0% | 77.6% | 58.9% | 88.0% | 97.6% | 92.2% | 99.9%  | 88.9% | 87.0% | 99.3% |
| 4.9 | 85.2% | 60.8% | 95.9% | 73.2% | 60.5% | 83.2% | 81.3% | 71.2% | 87.2% | 90.3% | 79.6% | 97.0% | 77.3% | 58.9% | 87.8% | 97.6% | 92.1% | 99.9%  | 88.9% | 87.0% | 99.3% |
| 5   | 85.2% | 60.8% | 95.9% | 73.1% | 60.4% | 83.2% | 80.8% | 70.9% | 86.7% | 90.3% | 79.6% | 96.9% | 77.1% | 58.7% | 87.7% | 97.6% | 92.1% | 99.9%  | 88.9% | 87.0% | 99.3% |
| 5.1 | 85.2% | 60.8% | 95.9% | 73.0% | 60.3% | 83.1% | 80.3% | 70.6% | 86.2% | 90.3% | 79.6% | 96.9% | 76.8% | 58.3% | 87.5% | 97.6% | 92.2% | 99.9%  | 88.9% | 87.0% | 99.2% |
| 5.2 | 85.2% | 60.8% | 95.9% | 72.9% | 60.2% | 83.0% | 79.8% | 70.3% | 85.8% | 90.3% | 79.6% | 96.9% | 76.6% | 58.0% | 87.3% | 97.6% | 92.2% | 99.9%  | 88.9% | 87.0% | 99.2% |
| 5.3 | 85.2% | 60.8% | 95.9% | 72.8% | 60.1% | 82.9% | 79.3% | 69.9% | 85.3% | 90.3% | 79.6% | 96.9% | 76.3% | 57.9% | 87.0% | 97.6% | 92.3% | 99.9%  | 88.9% | 87.0% | 99.2% |
| 5.4 | 85.2% | 60.8% | 95.9% | 72.7% | 60.0% | 82.9% | 78.8% | 69.7% | 84.8% | 90.3% | 79.6% | 96.8% | 76.0% | 57.8% | 86.9% | 97.6% | 92.3% | 99.9%  | 88.9% | 87.0% | 99.1% |
| 5.5 | 85.2% | 60.8% | 95.9% | 72.6% | 59.9% | 82.8% | 78.3% | 69.4% | 84.3% | 90.3% | 79.6% | 96.8% | 75.8% | 57.5% | 86.7% | 97.6% | 92.3% | 99.9%  | 88.9% | 87.0% | 99.1% |
| 5.6 | 85.2% | 60.8% | 95.9% | 72.5% | 59.8% | 82.8% | 77.8% | 69.1% | 83.8% | 90.3% | 79.6% | 96.8% | 75.5% | 57.3% | 86.5% | 97.6% | 92.3% | 99.9%  | 88.9% | 87.0% | 99.1% |
| 5.7 | 85.2% | 60.8% | 95.9% | 72.4% | 59.8% | 82.7% | 77.3% | 68.8% | 83.3% | 90.3% | 79.5% | 96.8% | 75.3% | 57.1% | 86.3% | 97.7% | 92.3% | 99.9%  | 88.9% | 87.0% | 99.1% |

|     |       |       |       |       |       |       |       |       |       |       |       |       |       |       |       |       |       |       |       |       |       |
|-----|-------|-------|-------|-------|-------|-------|-------|-------|-------|-------|-------|-------|-------|-------|-------|-------|-------|-------|-------|-------|-------|
| 5.8 | 85.2% | 60.8% | 95.9% | 72.3% | 59.7% | 82.7% | 76.8% | 68.5% | 82.8% | 90.3% | 79.3% | 96.8% | 75.0% | 57.1% | 86.0% | 97.7% | 92.3% | 99.9% | 88.9% | 87.0% | 99.0% |
| 5.9 | 85.2% | 60.8% | 95.9% | 72.3% | 59.6% | 82.6% | 76.3% | 68.1% | 82.3% | 90.3% | 79.2% | 96.8% | 74.8% | 56.7% | 85.8% | 97.7% | 92.3% | 99.9% | 88.9% | 87.0% | 99.0% |
| 6   | 85.2% | 60.8% | 95.9% | 72.2% | 59.5% | 82.5% | 75.8% | 67.8% | 81.8% | 90.3% | 79.1% | 96.7% | 74.5% | 56.5% | 85.7% | 97.7% | 92.3% | 99.9% | 88.9% | 87.0% | 99.0% |
| 6.1 | 85.2% | 60.8% | 95.9% | 72.1% | 59.4% | 82.5% | 75.3% | 67.5% | 81.3% | 90.3% | 78.9% | 96.7% | 74.3% | 56.2% | 85.6% | 97.7% | 92.3% | 99.9% | 88.9% | 87.0% | 99.0% |
| 6.2 | 85.2% | 60.8% | 95.9% | 72.0% | 59.3% | 82.4% | 74.8% | 67.2% | 80.7% | 90.3% | 78.8% | 96.7% | 74.0% | 56.1% | 85.4% | 97.7% | 92.3% | 99.9% | 88.9% | 87.0% | 98.9% |
| 6.3 | 85.2% | 60.8% | 95.9% | 71.9% | 59.2% | 82.4% | 74.3% | 66.9% | 80.1% | 90.3% | 78.7% | 96.7% | 73.8% | 55.9% | 85.2% | 97.7% | 92.3% | 99.9% | 88.9% | 87.0% | 98.9% |
| 6.4 | 85.2% | 60.8% | 95.9% | 71.8% | 59.1% | 82.3% | 73.8% | 66.6% | 79.6% | 90.3% | 78.7% | 96.7% | 73.5% | 55.8% | 85.0% | 97.7% | 92.4% | 99.8% | 88.9% | 87.0% | 98.9% |
| 6.5 | 85.2% | 60.8% | 95.9% | 71.7% | 59.0% | 82.2% | 73.3% | 66.2% | 79.1% | 90.3% | 78.7% | 96.7% | 73.3% | 55.6% | 84.8% | 97.7% | 92.4% | 99.8% | 88.9% | 87.0% | 98.8% |
| 6.6 | 85.2% | 60.8% | 95.9% | 71.6% | 58.9% | 82.1% | 72.8% | 65.9% | 78.6% | 90.3% | 78.7% | 96.7% | 73.0% | 55.5% | 84.6% | 97.7% | 92.4% | 99.8% | 88.9% | 87.0% | 98.8% |
| 6.7 | 85.2% | 60.8% | 95.9% | 71.5% | 58.7% | 82.1% | 72.3% | 65.5% | 78.0% | 90.3% | 78.7% | 96.6% | 72.8% | 55.3% | 84.5% | 97.7% | 92.4% | 99.8% | 88.9% | 87.0% | 98.8% |
| 6.8 | 85.2% | 60.8% | 95.9% | 71.4% | 58.6% | 82.0% | 71.8% | 65.3% | 77.4% | 90.3% | 78.6% | 96.6% | 72.5% | 55.2% | 84.3% | 97.7% | 92.4% | 99.8% | 88.9% | 87.0% | 98.7% |
| 6.9 | 85.2% | 60.8% | 95.9% | 71.3% | 58.5% | 81.9% | 71.3% | 65.0% | 76.9% | 90.3% | 78.6% | 96.6% | 72.3% | 55.0% | 84.3% | 97.7% | 92.4% | 99.8% | 88.9% | 87.0% | 98.7% |
| 7   | 85.2% | 60.8% | 95.9% | 71.2% | 58.4% | 81.8% | 70.8% | 64.6% | 76.3% | 90.3% | 78.6% | 96.6% | 72.0% | 54.7% | 84.1% | 97.7% | 92.4% | 99.8% | 88.9% | 87.0% | 98.7% |
| 7.1 | 85.2% | 60.8% | 95.9% | 71.1% | 58.3% | 81.8% | 70.3% | 64.3% | 75.7% | 90.3% | 78.6% | 96.5% | 71.8% | 54.3% | 83.9% | 97.7% | 92.4% | 99.8% | 88.9% | 87.0% | 98.6% |
| 7.2 | 85.2% | 60.8% | 95.9% | 71.0% | 58.1% | 81.7% | 69.8% | 63.9% | 75.1% | 90.3% | 78.6% | 96.5% | 71.5% | 54.1% | 83.8% | 97.7% | 92.4% | 99.8% | 88.9% | 87.0% | 98.6% |
| 7.3 | 85.2% | 60.8% | 95.9% | 70.9% | 58.0% | 81.6% | 69.3% | 63.6% | 74.6% | 90.3% | 78.6% | 96.5% | 71.3% | 54.0% | 83.6% | 97.7% | 92.5% | 99.8% | 88.9% | 87.0% | 98.5% |
| 7.4 | 85.2% | 60.8% | 95.9% | 70.8% | 57.9% | 81.5% | 68.9% | 63.3% | 74.0% | 90.3% | 78.5% | 96.5% | 71.1% | 53.7% | 83.4% | 97.7% | 92.5% | 99.8% | 88.9% | 86.9% | 98.5% |
| 7.5 | 85.2% | 60.8% | 95.9% | 70.7% | 57.8% | 81.4% | 68.4% | 62.9% | 73.5% | 90.3% | 78.5% | 96.5% | 70.8% | 53.4% | 83.2% | 97.7% | 92.5% | 99.8% | 88.9% | 86.9% | 98.4% |
| 7.6 | 85.2% | 60.8% | 95.9% | 70.6% | 57.7% | 81.4% | 67.9% | 62.6% | 73.0% | 90.3% | 78.5% | 96.5% | 70.6% | 53.2% | 83.0% | 97.7% | 92.5% | 99.8% | 88.9% | 86.9% | 98.4% |
| 7.7 | 85.2% | 60.8% | 95.9% | 70.5% | 57.5% | 81.3% | 67.4% | 62.3% | 72.6% | 90.3% | 78.5% | 96.5% | 70.4% | 53.0% | 82.9% | 97.7% | 92.5% | 99.8% | 88.9% | 86.9% | 98.3% |
| 7.8 | 85.2% | 60.8% | 95.9% | 70.4% | 57.4% | 81.2% | 67.0% | 62.0% | 72.1% | 90.3% | 78.5% | 96.4% | 70.1% | 52.8% | 82.8% | 97.7% | 92.5% | 99.7% | 88.9% | 86.9% | 98.3% |
| 7.9 | 85.2% | 60.8% | 95.9% | 70.3% | 57.3% | 81.1% | 66.5% | 61.6% | 71.7% | 90.3% | 78.5% | 96.4% | 69.9% | 52.6% | 82.7% | 97.7% | 92.5% | 99.7% | 88.9% | 86.9% | 98.2% |
| 8   | 85.2% | 60.8% | 95.9% | 70.2% | 57.1% | 81.0% | 66.1% | 61.3% | 71.2% | 90.3% | 78.4% | 96.4% | 69.7% | 52.4% | 82.6% | 97.7% | 92.5% | 99.7% | 88.9% | 86.9% | 98.2% |
| 8.1 | 85.2% | 60.8% | 95.9% | 70.1% | 57.0% | 81.0% | 65.6% | 61.0% | 70.7% | 90.3% | 78.4% | 96.4% | 69.5% | 52.3% | 82.5% | 97.7% | 92.5% | 99.7% | 88.9% | 86.9% | 98.1% |
| 8.2 | 85.2% | 60.8% | 95.9% | 70.0% | 56.9% | 80.9% | 65.2% | 60.7% | 70.3% | 90.3% | 78.4% | 96.4% | 69.2% | 52.1% | 82.2% | 97.7% | 92.4% | 99.7% | 88.9% | 86.9% | 98.1% |
| 8.3 | 85.2% | 60.8% | 95.9% | 69.9% | 56.7% | 80.8% | 64.7% | 60.4% | 69.9% | 90.3% | 78.4% | 96.4% | 69.0% | 51.9% | 82.0% | 97.7% | 92.4% | 99.7% | 88.9% | 86.9% | 98.0% |
| 8.4 | 85.2% | 60.8% | 95.9% | 69.8% | 56.6% | 80.7% | 64.3% | 60.1% | 69.5% | 90.3% | 78.4% | 96.4% | 68.8% | 51.7% | 81.8% | 97.7% | 92.4% | 99.7% | 88.9% | 86.9% | 98.0% |
| 8.5 | 85.2% | 60.8% | 95.9% | 69.7% | 56.5% | 80.7% | 63.9% | 59.7% | 69.1% | 90.3% | 78.4% | 96.4% | 68.6% | 51.6% | 81.6% | 97.7% | 92.4% | 99.7% | 88.9% | 86.9% | 97.9% |
| 8.6 | 85.2% | 60.8% | 95.9% | 69.6% | 56.3% | 80.6% | 63.5% | 59.5% | 68.7% | 90.3% | 78.4% | 96.4% | 68.4% | 51.4% | 81.4% | 97.7% | 92.4% | 99.6% | 88.9% | 86.9% | 97.9% |
| 8.7 | 85.2% | 60.8% | 95.9% | 69.5% | 56.2% | 80.5% | 63.1% | 59.2% | 68.3% | 90.3% | 78.3% | 96.4% | 68.1% | 51.2% | 81.1% | 97.7% | 92.4% | 99.6% | 88.9% | 86.9% | 97.8% |
| 8.8 | 85.2% | 60.8% | 95.9% | 69.4% | 56.1% | 80.5% | 62.6% | 58.9% | 68.0% | 90.3% | 78.3% | 96.4% | 67.9% | 51.1% | 81.0% | 97.7% | 92.3% | 99.6% | 88.9% | 86.9% | 97.8% |
| 8.9 | 85.2% | 60.8% | 95.9% | 69.3% | 55.9% | 80.4% | 62.3% | 58.7% | 67.6% | 90.3% | 78.3% | 96.3% | 67.7% | 50.9% | 81.0% | 97.7% | 92.3% | 99.6% | 88.9% | 86.9% | 97.7% |

|      |       |       |       |       |       |       |       |       |       |       |       |       |       |       |       |       |       |       |       |       |       |
|------|-------|-------|-------|-------|-------|-------|-------|-------|-------|-------|-------|-------|-------|-------|-------|-------|-------|-------|-------|-------|-------|
| 9    | 85.2% | 60.8% | 95.9% | 69.2% | 55.8% | 80.3% | 61.9% | 58.4% | 67.2% | 90.3% | 78.3% | 96.3% | 67.5% | 50.6% | 80.9% | 97.7% | 92.2% | 99.6% | 88.9% | 86.9% | 97.7% |
| 9.1  | 85.2% | 60.8% | 95.9% | 69.1% | 55.7% | 80.2% | 61.5% | 58.1% | 66.8% | 90.3% | 78.3% | 96.3% | 67.3% | 50.4% | 80.8% | 97.7% | 92.2% | 99.6% | 88.9% | 86.9% | 97.6% |
| 9.2  | 85.2% | 60.8% | 95.9% | 69.0% | 55.5% | 80.2% | 61.1% | 57.7% | 66.5% | 90.3% | 78.3% | 96.3% | 67.1% | 50.1% | 80.6% | 97.7% | 92.1% | 99.6% | 88.9% | 86.9% | 97.6% |
| 9.3  | 85.2% | 60.8% | 95.9% | 68.9% | 55.4% | 80.1% | 60.7% | 57.4% | 66.2% | 90.3% | 78.3% | 96.3% | 66.9% | 49.9% | 80.4% | 97.7% | 92.1% | 99.6% | 88.9% | 86.9% | 97.5% |
| 9.4  | 85.2% | 60.8% | 95.8% | 68.8% | 55.3% | 80.0% | 60.4% | 57.1% | 65.9% | 90.3% | 78.3% | 96.3% | 66.7% | 49.8% | 80.3% | 97.7% | 92.1% | 99.6% | 88.9% | 86.9% | 97.4% |
| 9.5  | 85.2% | 60.8% | 95.8% | 68.7% | 55.1% | 79.9% | 60.0% | 56.8% | 65.7% | 90.3% | 78.2% | 96.3% | 66.5% | 49.8% | 80.3% | 97.7% | 92.1% | 99.6% | 88.9% | 86.9% | 97.4% |
| 9.6  | 85.2% | 60.8% | 95.8% | 68.6% | 55.0% | 79.9% | 59.7% | 56.6% | 65.4% | 90.3% | 78.2% | 96.3% | 66.3% | 49.6% | 80.2% | 97.7% | 92.1% | 99.6% | 88.9% | 86.9% | 97.3% |
| 9.7  | 85.2% | 60.8% | 95.8% | 68.5% | 54.9% | 79.8% | 59.3% | 56.3% | 65.1% | 90.3% | 78.2% | 96.3% | 66.1% | 49.4% | 80.1% | 97.7% | 92.1% | 99.5% | 88.9% | 86.9% | 97.3% |
| 9.8  | 85.2% | 60.8% | 95.8% | 68.4% | 54.7% | 79.7% | 59.0% | 56.0% | 64.8% | 90.3% | 78.2% | 96.3% | 66.0% | 49.2% | 79.9% | 97.7% | 92.0% | 99.5% | 88.9% | 86.9% | 97.2% |
| 9.9  | 85.2% | 60.7% | 95.8% | 68.3% | 54.6% | 79.6% | 58.7% | 55.7% | 64.6% | 90.3% | 78.2% | 96.3% | 65.8% | 49.0% | 79.8% | 97.7% | 91.9% | 99.5% | 88.9% | 86.9% | 97.2% |
| 10   | 85.2% | 60.7% | 95.8% | 68.2% | 54.5% | 79.6% | 58.4% | 55.5% | 64.4% | 90.3% | 78.2% | 96.3% | 65.6% | 48.8% | 79.7% | 97.7% | 91.9% | 99.5% | 88.9% | 86.9% | 97.1% |
| 10.1 | 85.2% | 60.7% | 95.8% | 68.1% | 54.3% | 79.5% | 58.1% | 55.1% | 64.1% | 90.3% | 78.2% | 96.3% | 65.4% | 48.6% | 79.6% | 97.7% | 91.8% | 99.5% | 88.9% | 86.9% | 97.0% |
| 10.2 | 85.2% | 60.7% | 95.8% | 68.0% | 54.2% | 79.4% | 57.8% | 54.8% | 63.9% | 90.3% | 78.2% | 96.3% | 65.2% | 48.4% | 79.4% | 97.7% | 91.8% | 99.5% | 88.9% | 86.9% | 97.0% |
| 10.3 | 85.2% | 60.7% | 95.8% | 67.9% | 54.1% | 79.4% | 57.5% | 54.6% | 63.7% | 90.3% | 78.2% | 96.3% | 65.1% | 48.2% | 79.3% | 97.7% | 91.8% | 99.5% | 88.9% | 86.8% | 96.9% |
| 10.4 | 85.2% | 60.7% | 95.8% | 67.8% | 53.9% | 79.3% | 57.2% | 54.3% | 63.5% | 90.3% | 78.1% | 96.3% | 64.9% | 48.0% | 79.1% | 97.6% | 91.7% | 99.5% | 88.9% | 86.8% | 96.8% |
| 10.5 | 85.2% | 60.7% | 95.8% | 67.7% | 53.8% | 79.2% | 56.9% | 54.0% | 63.2% | 90.3% | 78.1% | 96.3% | 64.7% | 47.8% | 79.0% | 97.6% | 91.7% | 99.5% | 88.9% | 86.8% | 96.8% |
| 10.6 | 85.2% | 60.7% | 95.8% | 67.6% | 53.7% | 79.1% | 56.7% | 53.7% | 63.0% | 90.3% | 78.1% | 96.3% | 64.5% | 47.7% | 78.9% | 97.6% | 91.7% | 99.5% | 88.9% | 86.8% | 96.7% |
| 10.7 | 85.2% | 60.7% | 95.8% | 67.5% | 53.5% | 79.1% | 56.4% | 53.4% | 62.8% | 90.3% | 78.1% | 96.2% | 64.4% | 47.6% | 78.8% | 97.6% | 91.7% | 99.5% | 88.9% | 86.8% | 96.6% |
| 10.8 | 85.2% | 60.7% | 95.8% | 67.3% | 53.4% | 79.0% | 56.2% | 53.2% | 62.6% | 90.3% | 78.1% | 96.2% | 64.2% | 47.3% | 78.7% | 97.6% | 91.6% | 99.5% | 88.9% | 86.8% | 96.6% |
| 10.9 | 85.2% | 60.7% | 95.8% | 67.2% | 53.3% | 78.9% | 55.9% | 52.9% | 62.3% | 90.3% | 78.1% | 96.2% | 64.1% | 47.2% | 78.6% | 97.6% | 91.5% | 99.5% | 88.9% | 86.8% | 96.5% |
| 11   | 85.2% | 60.7% | 95.8% | 67.1% | 53.1% | 78.8% | 55.7% | 52.7% | 62.1% | 90.3% | 78.1% | 96.2% | 63.9% | 47.0% | 78.5% | 97.6% | 91.4% | 99.5% | 88.9% | 86.8% | 96.4% |
| 11.1 | 85.2% | 60.7% | 95.8% | 67.0% | 53.0% | 78.8% | 55.5% | 52.5% | 61.9% | 90.3% | 78.1% | 96.2% | 63.8% | 46.9% | 78.4% | 97.6% | 91.3% | 99.5% | 88.9% | 86.8% | 96.4% |
| 11.2 | 85.2% | 60.7% | 95.8% | 66.9% | 52.9% | 78.7% | 55.3% | 52.3% | 61.6% | 90.3% | 78.1% | 96.1% | 63.6% | 46.8% | 78.3% | 97.6% | 91.2% | 99.5% | 88.9% | 86.8% | 96.4% |
| 11.3 | 85.2% | 60.7% | 95.8% | 66.8% | 52.7% | 78.6% | 55.1% | 52.0% | 61.5% | 90.3% | 78.1% | 96.1% | 63.5% | 46.6% | 78.2% | 97.6% | 91.1% | 99.5% | 88.9% | 86.8% | 96.3% |
| 11.4 | 85.2% | 60.7% | 95.8% | 66.7% | 52.6% | 78.5% | 54.9% | 51.7% | 61.3% | 90.3% | 78.1% | 96.0% | 63.3% | 46.5% | 78.1% | 97.6% | 91.1% | 99.5% | 88.9% | 86.8% | 96.2% |
| 11.5 | 85.2% | 60.7% | 95.8% | 66.6% | 52.5% | 78.4% | 54.7% | 51.5% | 61.1% | 90.3% | 78.1% | 96.0% | 63.2% | 46.4% | 78.1% | 97.6% | 91.0% | 99.4% | 88.9% | 86.8% | 96.1% |
| 11.6 | 85.2% | 60.7% | 95.8% | 66.5% | 52.4% | 78.4% | 54.6% | 51.4% | 60.9% | 90.3% | 78.0% | 96.0% | 63.0% | 46.2% | 78.0% | 97.5% | 91.0% | 99.4% | 88.9% | 86.8% | 96.1% |
| 11.7 | 85.2% | 60.7% | 95.8% | 66.4% | 52.3% | 78.3% | 54.4% | 51.2% | 60.7% | 90.3% | 78.0% | 96.0% | 62.9% | 46.1% | 77.9% | 97.5% | 90.9% | 99.4% | 88.9% | 86.8% | 96.0% |
| 11.8 | 85.2% | 60.7% | 95.8% | 66.3% | 52.2% | 78.2% | 54.2% | 51.1% | 60.5% | 90.3% | 78.0% | 96.0% | 62.8% | 46.0% | 77.8% | 97.5% | 90.9% | 99.4% | 88.9% | 86.8% | 95.9% |
| 11.9 | 85.2% | 60.7% | 95.8% | 66.2% | 52.1% | 78.1% | 54.1% | 50.9% | 60.4% | 90.3% | 78.0% | 96.0% | 62.6% | 45.7% | 77.8% | 97.5% | 90.8% | 99.4% | 88.9% | 86.8% | 95.8% |
| 12   | 85.2% | 60.7% | 95.8% | 66.1% | 52.0% | 78.1% | 54.0% | 50.7% | 60.2% | 90.3% | 78.0% | 96.0% | 62.5% | 45.5% | 77.7% | 97.5% | 90.7% | 99.4% | 88.9% | 86.8% | 95.8% |
| 12.1 | 85.2% | 60.7% | 95.8% | 66.0% | 51.9% | 78.0% | 53.8% | 50.6% | 60.1% | 90.3% | 78.0% | 96.0% | 62.4% | 45.4% | 77.6% | 97.5% | 90.7% | 99.4% | 88.9% | 86.8% | 95.7% |

|      |       |       |       |       |       |       |       |       |       |       |       |       |       |       |       |       |       |       |       |       |       |
|------|-------|-------|-------|-------|-------|-------|-------|-------|-------|-------|-------|-------|-------|-------|-------|-------|-------|-------|-------|-------|-------|
| 12.2 | 85.2% | 60.7% | 95.8% | 65.9% | 51.8% | 77.9% | 53.7% | 50.5% | 59.9% | 90.3% | 78.0% | 96.0% | 62.3% | 45.3% | 77.5% | 97.5% | 90.6% | 99.4% | 88.9% | 86.8% | 95.6% |
| 12.3 | 85.2% | 60.7% | 95.8% | 65.8% | 51.7% | 77.8% | 53.6% | 50.3% | 59.6% | 90.3% | 78.0% | 96.0% | 62.1% | 45.2% | 77.5% | 97.5% | 90.5% | 99.4% | 88.9% | 86.8% | 95.5% |
| 12.4 | 85.2% | 60.7% | 95.8% | 65.7% | 51.6% | 77.7% | 53.5% | 50.2% | 59.5% | 90.3% | 78.0% | 96.0% | 62.0% | 45.1% | 77.4% | 97.4% | 90.5% | 99.4% | 88.9% | 86.8% | 95.4% |
| 12.5 | 85.2% | 60.7% | 95.8% | 65.5% | 51.5% | 77.7% | 53.4% | 50.1% | 59.3% | 90.3% | 78.0% | 95.9% | 61.9% | 45.0% | 77.3% | 97.4% | 90.4% | 99.3% | 88.9% | 86.8% | 95.3% |
| 12.6 | 85.2% | 60.7% | 95.8% | 65.4% | 51.4% | 77.6% | 53.3% | 50.0% | 59.2% | 90.3% | 78.0% | 95.9% | 61.8% | 44.9% | 77.3% | 97.4% | 90.3% | 99.3% | 88.9% | 86.8% | 95.3% |
| 12.7 | 85.2% | 60.7% | 95.8% | 65.3% | 51.3% | 77.5% | 53.3% | 49.9% | 59.1% | 90.3% | 78.0% | 95.9% | 61.7% | 44.8% | 77.2% | 97.4% | 90.3% | 99.3% | 88.9% | 86.8% | 95.2% |
| 12.8 | 85.2% | 60.7% | 95.8% | 65.2% | 51.1% | 77.4% | 53.2% | 49.8% | 59.0% | 90.3% | 78.0% | 95.9% | 61.6% | 44.7% | 77.2% | 97.4% | 90.3% | 99.3% | 88.9% | 86.8% | 95.1% |
| 12.9 | 85.2% | 60.7% | 95.8% | 65.1% | 51.0% | 77.3% | 53.1% | 49.8% | 58.8% | 90.3% | 77.9% | 95.9% | 61.5% | 44.5% | 77.1% | 97.4% | 90.3% | 99.3% | 88.9% | 86.8% | 95.0% |
| 13   | 85.2% | 60.7% | 95.8% | 65.0% | 50.9% | 77.3% | 53.1% | 49.7% | 58.6% | 90.3% | 77.8% | 95.9% | 61.4% | 44.4% | 77.0% | 97.4% | 90.2% | 99.3% | 88.9% | 86.8% | 95.0% |
| 13.1 | 85.2% | 60.7% | 95.8% | 64.9% | 50.7% | 77.2% | 53.1% | 49.7% | 58.5% | 90.3% | 77.8% | 95.9% | 61.3% | 44.3% | 76.9% | 97.3% | 90.2% | 99.3% | 88.9% | 86.8% | 94.9% |
| 13.2 | 85.2% | 60.7% | 95.8% | 64.8% | 50.6% | 77.1% | 53.0% | 49.6% | 58.4% | 90.3% | 77.7% | 95.9% | 61.2% | 44.1% | 76.8% | 97.3% | 90.1% | 99.3% | 88.9% | 86.8% | 94.8% |
| 13.3 | 85.2% | 60.7% | 95.8% | 64.7% | 50.5% | 77.0% | 53.0% | 49.6% | 58.3% | 90.3% | 77.6% | 95.9% | 61.1% | 44.0% | 76.7% | 97.3% | 90.1% | 99.3% | 88.9% | 86.8% | 94.7% |
| 13.4 | 85.2% | 60.7% | 95.8% | 64.6% | 50.3% | 76.9% | 53.0% | 49.6% | 58.2% | 90.3% | 77.6% | 95.9% | 61.0% | 43.9% | 76.5% | 97.3% | 90.0% | 99.3% | 88.9% | 86.8% | 94.6% |
| 13.5 | 85.2% | 60.7% | 95.8% | 64.5% | 50.2% | 76.9% | 53.0% | 49.6% | 58.1% | 90.3% | 77.5% | 95.9% | 61.0% | 43.8% | 76.4% | 97.3% | 89.9% | 99.3% | 88.9% | 86.8% | 94.6% |
| 13.6 | 85.2% | 60.7% | 95.8% | 64.4% | 50.1% | 76.8% | 53.0% | 49.6% | 58.0% | 90.3% | 77.5% | 95.9% | 60.9% | 43.7% | 76.3% | 97.3% | 89.8% | 99.3% | 88.9% | 86.8% | 94.5% |
| 13.7 | 85.2% | 60.7% | 95.8% | 64.2% | 50.0% | 76.7% | 53.0% | 49.6% | 58.0% | 90.3% | 77.5% | 95.9% | 60.8% | 43.6% | 76.2% | 97.2% | 89.7% | 99.3% | 88.9% | 86.8% | 94.4% |
| 13.8 | 85.2% | 60.7% | 95.8% | 64.1% | 49.9% | 76.6% | 53.0% | 49.6% | 57.9% | 90.3% | 77.5% | 95.9% | 60.7% | 43.5% | 76.1% | 97.2% | 89.6% | 99.3% | 88.9% | 86.8% | 94.3% |
| 13.9 | 85.2% | 60.7% | 95.8% | 64.0% | 49.8% | 76.5% | 53.0% | 49.6% | 57.9% | 90.3% | 77.5% | 95.9% | 60.7% | 43.4% | 76.0% | 97.2% | 89.5% | 99.3% | 88.9% | 86.8% | 94.3% |
| 14   | 85.2% | 60.7% | 95.8% | 63.9% | 49.6% | 76.5% | 53.0% | 49.6% | 57.9% | 90.3% | 77.5% | 95.9% | 60.6% | 43.3% | 75.9% | 97.2% | 89.4% | 99.3% | 88.9% | 86.8% | 94.2% |
| 14.1 | 85.2% | 60.7% | 95.8% | 63.8% | 49.5% | 76.4% | 53.0% | 49.5% | 57.9% | 90.3% | 77.5% | 95.9% | 60.5% | 43.3% | 75.8% | 97.2% | 89.3% | 99.3% | 88.9% | 86.8% | 94.1% |
| 14.2 | 85.2% | 60.7% | 95.8% | 63.7% | 49.4% | 76.3% | 53.0% | 49.5% | 57.9% | 90.3% | 77.5% | 95.9% | 60.5% | 43.2% | 75.7% | 97.1% | 89.2% | 99.3% | 88.9% | 86.8% | 94.1% |
| 14.3 | 85.2% | 60.7% | 95.8% | 63.6% | 49.2% | 76.2% | 53.0% | 49.5% | 57.8% | 90.3% | 77.4% | 95.9% | 60.4% | 43.1% | 75.6% | 97.1% | 89.1% | 99.3% | 88.9% | 86.8% | 94.0% |
| 14.4 | 85.2% | 60.7% | 95.8% | 63.5% | 49.1% | 76.1% | 53.0% | 49.5% | 57.8% | 90.3% | 77.4% | 95.9% | 60.4% | 43.0% | 75.5% | 97.1% | 89.0% | 99.2% | 88.9% | 86.8% | 94.0% |
| 14.5 | 85.2% | 60.7% | 95.8% | 63.4% | 49.0% | 76.0% | 53.0% | 49.5% | 57.8% | 90.3% | 77.4% | 95.9% | 60.3% | 43.0% | 75.5% | 97.1% | 88.9% | 99.2% | 88.9% | 86.8% | 93.9% |
| 14.6 | 85.2% | 60.7% | 95.8% | 63.3% | 48.9% | 76.0% | 53.0% | 49.5% | 57.7% | 90.3% | 77.4% | 95.9% | 60.3% | 42.9% | 75.4% | 97.0% | 88.8% | 99.2% | 88.9% | 86.8% | 93.8% |
| 14.7 | 85.2% | 60.7% | 95.8% | 63.1% | 48.7% | 75.9% | 53.0% | 49.5% | 57.7% | 90.3% | 77.4% | 95.9% | 60.2% | 42.9% | 75.4% | 97.0% | 88.8% | 99.2% | 88.9% | 86.8% | 93.7% |
| 14.8 | 85.2% | 60.7% | 95.8% | 63.0% | 48.6% | 75.8% | 53.0% | 49.5% | 57.6% | 90.3% | 77.4% | 95.9% | 60.2% | 42.8% | 75.4% | 97.0% | 88.7% | 99.2% | 88.9% | 86.8% | 93.7% |
| 14.9 | 85.2% | 60.7% | 95.8% | 62.9% | 48.5% | 75.7% | 53.0% | 49.5% | 57.6% | 90.3% | 77.4% | 95.9% | 60.2% | 42.8% | 75.3% | 97.0% | 88.6% | 99.2% | 88.9% | 86.8% | 93.6% |
| 15   | 85.2% | 60.7% | 95.8% | 62.8% | 48.3% | 75.6% | 53.0% | 49.5% | 57.6% | 90.3% | 77.4% | 95.9% | 60.1% | 42.7% | 75.3% | 96.9% | 88.5% | 99.2% | 88.9% | 86.8% | 93.6% |
| 15.1 | 85.2% | 60.7% | 95.8% | 62.7% | 48.2% | 75.5% | 53.0% | 49.5% | 57.6% | 90.3% | 77.4% | 95.9% | 60.1% | 42.7% | 75.3% | 96.9% | 88.4% | 99.2% | 88.9% | 86.7% | 93.6% |
| 15.2 | 85.2% | 60.7% | 95.8% | 62.6% | 48.1% | 75.5% | 53.0% | 49.4% | 57.5% | 90.3% | 77.4% | 95.9% | 60.1% | 42.7% | 75.3% | 96.9% | 88.3% | 99.2% | 88.9% | 86.7% | 93.6% |
| 15.3 | 85.2% | 60.7% | 95.8% | 62.5% | 48.0% | 75.4% | 53.0% | 49.3% | 57.5% | 90.3% | 77.4% | 95.9% | 60.0% | 42.7% | 75.2% | 96.9% | 88.2% | 99.2% | 88.9% | 86.7% | 93.6% |

|      |       |       |       |       |       |       |       |       |       |       |       |       |       |       |       |       |       |       |       |       |       |
|------|-------|-------|-------|-------|-------|-------|-------|-------|-------|-------|-------|-------|-------|-------|-------|-------|-------|-------|-------|-------|-------|
| 15.4 | 85.2% | 60.7% | 95.8% | 62.4% | 47.8% | 75.3% | 53.0% | 49.2% | 57.5% | 90.3% | 77.4% | 95.9% | 60.0% | 42.6% | 75.2% | 96.8% | 88.2% | 99.2% | 88.9% | 86.7% | 93.5% |
| 15.5 | 85.2% | 60.7% | 95.8% | 62.3% | 47.7% | 75.2% | 53.0% | 49.2% | 57.3% | 90.3% | 77.4% | 95.9% | 60.0% | 42.6% | 75.2% | 96.8% | 88.1% | 99.2% | 88.9% | 86.7% | 93.5% |
| 15.6 | 85.2% | 60.7% | 95.8% | 62.1% | 47.6% | 75.1% | 53.0% | 49.1% | 57.3% | 90.3% | 77.4% | 95.9% | 60.0% | 42.6% | 75.2% | 96.8% | 88.0% | 99.2% | 88.9% | 86.7% | 93.5% |
| 15.7 | 85.2% | 60.7% | 95.8% | 62.0% | 47.4% | 75.0% | 53.0% | 49.0% | 57.3% | 90.3% | 77.4% | 95.9% | 60.0% | 42.6% | 75.1% | 96.7% | 88.0% | 99.2% | 88.9% | 86.7% | 93.5% |
| 15.8 | 85.2% | 60.7% | 95.8% | 61.9% | 47.3% | 74.9% | 53.0% | 49.0% | 57.3% | 90.3% | 77.4% | 95.9% | 60.0% | 42.6% | 75.0% | 96.7% | 87.9% | 99.2% | 88.9% | 86.7% | 93.5% |
| 15.9 | 85.2% | 60.7% | 95.8% | 61.8% | 47.2% | 74.9% | 53.0% | 49.0% | 57.2% | 90.3% | 77.4% | 95.9% | 60.0% | 42.6% | 75.0% | 96.7% | 87.8% | 99.1% | 88.9% | 86.7% | 93.4% |
| 16   | 85.2% | 60.7% | 95.8% | 61.7% | 47.0% | 74.8% | 53.0% | 48.9% | 57.2% | 90.3% | 77.4% | 95.9% | 60.0% | 42.6% | 74.9% | 96.7% | 87.7% | 99.1% | 88.9% | 86.7% | 93.4% |
| 16.1 | 85.2% | 60.7% | 95.8% | 61.6% | 46.9% | 74.7% | 53.0% | 48.9% | 57.2% | 90.3% | 77.4% | 95.9% | 60.0% | 42.6% | 74.9% | 96.6% | 87.6% | 99.1% | 88.9% | 86.7% | 93.3% |
| 16.2 | 85.2% | 60.7% | 95.8% | 61.5% | 46.8% | 74.6% | 53.0% | 48.9% | 57.1% | 90.3% | 77.4% | 95.9% | 60.0% | 42.5% | 74.8% | 96.6% | 87.5% | 99.1% | 88.9% | 86.7% | 93.3% |
| 16.3 | 85.2% | 60.7% | 95.8% | 61.4% | 46.7% | 74.5% | 53.0% | 48.8% | 57.1% | 90.3% | 77.4% | 95.9% | 60.0% | 42.5% | 74.8% | 96.6% | 87.4% | 99.1% | 88.9% | 86.7% | 93.3% |
| 16.4 | 85.2% | 60.7% | 95.8% | 61.2% | 46.5% | 74.4% | 53.0% | 48.8% | 57.0% | 90.3% | 77.4% | 95.9% | 60.0% | 42.5% | 74.8% | 96.5% | 87.2% | 99.1% | 88.9% | 86.7% | 93.2% |
| 16.5 | 85.2% | 60.7% | 95.8% | 61.1% | 46.4% | 74.3% | 53.0% | 48.8% | 57.0% | 90.3% | 77.4% | 95.9% | 60.0% | 42.5% | 74.8% | 96.5% | 87.2% | 99.1% | 88.9% | 86.7% | 93.2% |
| 16.6 | 85.2% | 60.7% | 95.8% | 61.0% | 46.3% | 74.2% | 53.0% | 48.7% | 57.0% | 90.3% | 77.4% | 95.9% | 60.0% | 42.5% | 74.8% | 96.4% | 87.1% | 99.1% | 88.9% | 86.7% | 93.2% |
| 16.7 | 85.2% | 60.7% | 95.8% | 60.9% | 46.2% | 74.2% | 53.0% | 48.6% | 57.0% | 90.3% | 77.4% | 95.9% | 60.0% | 42.5% | 74.7% | 96.4% | 87.1% | 99.1% | 88.9% | 86.7% | 93.1% |
| 16.8 | 85.2% | 60.7% | 95.8% | 60.8% | 46.0% | 74.1% | 53.0% | 48.6% | 57.0% | 90.3% | 77.4% | 95.9% | 60.0% | 42.5% | 74.7% | 96.4% | 87.0% | 99.1% | 88.9% | 86.7% | 93.1% |
| 16.9 | 85.2% | 60.7% | 95.8% | 60.7% | 45.9% | 74.0% | 53.0% | 48.6% | 57.0% | 90.3% | 77.3% | 95.9% | 60.0% | 42.5% | 74.6% | 96.3% | 86.9% | 99.1% | 88.9% | 86.7% | 93.1% |
| 17   | 85.2% | 60.7% | 95.8% | 60.6% | 45.8% | 73.9% | 53.0% | 48.5% | 56.9% | 90.3% | 77.2% | 95.9% | 60.0% | 42.5% | 74.6% | 96.3% | 86.8% | 99.1% | 88.9% | 86.7% | 93.1% |
| 17.1 | 85.2% | 60.7% | 95.8% | 60.4% | 45.6% | 73.8% | 53.0% | 48.5% | 56.9% | 90.3% | 77.2% | 95.9% | 60.0% | 42.4% | 74.6% | 96.3% | 86.7% | 99.1% | 88.9% | 86.7% | 93.1% |
| 17.2 | 85.2% | 60.7% | 95.8% | 60.3% | 45.5% | 73.7% | 53.0% | 48.4% | 56.9% | 90.3% | 77.1% | 95.9% | 60.0% | 42.4% | 74.6% | 96.2% | 86.6% | 99.1% | 88.9% | 86.7% | 93.1% |
| 17.3 | 85.2% | 60.7% | 95.8% | 60.2% | 45.4% | 73.6% | 53.0% | 48.4% | 56.8% | 90.3% | 77.1% | 95.9% | 60.0% | 42.3% | 74.6% | 96.2% | 86.5% | 99.1% | 88.9% | 86.7% | 93.1% |
| 17.4 | 85.2% | 60.7% | 95.8% | 60.1% | 45.3% | 73.5% | 53.0% | 48.3% | 56.7% | 90.3% | 77.1% | 95.9% | 60.0% | 42.3% | 74.6% | 96.1% | 86.4% | 99.0% | 88.9% | 86.7% | 93.1% |
| 17.5 | 85.2% | 60.7% | 95.8% | 60.0% | 45.1% | 73.5% | 53.0% | 48.3% | 56.7% | 90.2% | 77.1% | 95.9% | 60.0% | 42.2% | 74.5% | 96.1% | 86.3% | 99.0% | 88.9% | 86.7% | 93.1% |
| 17.6 | 85.2% | 60.7% | 95.8% | 59.9% | 45.0% | 73.4% | 53.0% | 48.2% | 56.7% | 90.2% | 77.1% | 95.9% | 60.0% | 42.2% | 74.5% | 96.0% | 86.2% | 99.0% | 88.9% | 86.7% | 93.1% |
| 17.7 | 85.2% | 60.7% | 95.8% | 59.8% | 44.9% | 73.3% | 53.0% | 48.1% | 56.7% | 90.2% | 77.1% | 95.9% | 60.0% | 42.2% | 74.5% | 96.0% | 86.1% | 99.0% | 88.9% | 86.7% | 93.1% |
| 17.8 | 85.2% | 60.7% | 95.8% | 59.6% | 44.7% | 73.2% | 53.0% | 48.1% | 56.6% | 90.2% | 77.0% | 95.9% | 59.9% | 42.1% | 74.4% | 95.9% | 86.0% | 99.0% | 88.9% | 86.7% | 93.1% |
| 17.9 | 85.2% | 60.7% | 95.8% | 59.5% | 44.6% | 73.1% | 53.0% | 48.0% | 56.6% | 90.2% | 77.0% | 95.9% | 59.9% | 42.1% | 74.4% | 95.9% | 85.9% | 99.0% | 88.9% | 86.7% | 93.1% |
| 18   | 85.2% | 60.7% | 95.8% | 59.4% | 44.5% | 73.0% | 53.0% | 48.0% | 56.6% | 90.2% | 77.0% | 95.9% | 59.9% | 42.1% | 74.3% | 95.9% | 85.8% | 99.0% | 88.9% | 86.7% | 93.1% |
| 18.1 | 85.2% | 60.7% | 95.8% | 59.3% | 44.4% | 72.9% | 53.0% | 47.9% | 56.6% | 90.2% | 77.0% | 95.9% | 59.9% | 42.1% | 74.3% | 95.8% | 85.7% | 99.0% | 88.9% | 86.6% | 93.1% |
| 18.2 | 85.2% | 60.7% | 95.8% | 59.2% | 44.2% | 72.8% | 53.0% | 47.9% | 56.6% | 90.2% | 77.0% | 95.9% | 59.8% | 42.0% | 74.3% | 95.8% | 85.6% | 99.0% | 88.9% | 86.6% | 93.1% |
| 18.3 | 85.2% | 60.7% | 95.8% | 59.1% | 44.1% | 72.7% | 53.0% | 47.9% | 56.6% | 90.2% | 77.0% | 95.9% | 59.8% | 41.9% | 74.2% | 95.7% | 85.5% | 99.0% | 88.9% | 86.6% | 93.1% |
| 18.4 | 85.2% | 60.7% | 95.8% | 58.9% | 44.0% | 72.6% | 53.0% | 47.8% | 56.6% | 90.2% | 77.0% | 95.9% | 59.8% | 41.7% | 74.2% | 95.7% | 85.4% | 99.0% | 88.9% | 86.6% | 93.1% |
| 18.5 | 85.2% | 60.7% | 95.8% | 58.8% | 43.9% | 72.5% | 53.0% | 47.8% | 56.6% | 90.2% | 77.0% | 95.9% | 59.7% | 41.7% | 74.2% | 95.6% | 85.3% | 99.0% | 88.9% | 86.6% | 93.0% |



|      |       |       |       |       |       |       |       |       |       |       |       |       |       |       |       |       |       |       |       |       |       |
|------|-------|-------|-------|-------|-------|-------|-------|-------|-------|-------|-------|-------|-------|-------|-------|-------|-------|-------|-------|-------|-------|
| 18.6 | 85.2% | 60.7% | 95.8% | 58.7% | 43.7% | 72.4% | 53.0% | 47.8% | 56.5% | 90.2% | 77.0% | 95.9% | 59.7% | 41.7% | 74.1% | 95.6% | 85.2% | 99.0% | 88.9% | 86.5% | 93.0% |
| 18.7 | 85.2% | 60.7% | 95.8% | 58.6% | 43.6% | 72.4% | 53.0% | 47.8% | 56.5% | 90.2% | 77.0% | 95.9% | 59.7% | 41.6% | 74.1% | 95.5% | 85.1% | 98.9% | 88.9% | 86.5% | 93.0% |
| 18.8 | 85.2% | 60.7% | 95.8% | 58.5% | 43.5% | 72.3% | 53.0% | 47.7% | 56.4% | 90.1% | 77.0% | 95.9% | 59.6% | 41.6% | 74.1% | 95.5% | 85.0% | 98.9% | 88.9% | 86.5% | 93.0% |
| 18.9 | 85.2% | 60.7% | 95.8% | 58.3% | 43.3% | 72.2% | 53.0% | 47.7% | 56.4% | 90.1% | 77.0% | 95.9% | 59.6% | 41.5% | 74.0% | 95.4% | 84.9% | 98.9% | 88.9% | 86.5% | 93.0% |
| 19   | 85.2% | 60.7% | 95.8% | 58.2% | 43.2% | 72.1% | 53.0% | 47.7% | 56.4% | 90.1% | 76.9% | 95.8% | 59.5% | 41.5% | 74.0% | 95.4% | 84.8% | 98.9% | 88.9% | 86.5% | 93.0% |
| 19.1 | 85.2% | 60.7% | 95.8% | 58.1% | 43.1% | 72.0% | 53.0% | 47.7% | 56.3% | 90.1% | 76.9% | 95.8% | 59.5% | 41.5% | 73.9% | 95.3% | 84.6% | 98.9% | 88.9% | 86.5% | 93.0% |
| 19.2 | 85.2% | 60.7% | 95.8% | 58.0% | 43.0% | 71.9% | 53.0% | 47.6% | 56.3% | 90.1% | 76.9% | 95.8% | 59.4% | 41.4% | 73.9% | 95.3% | 84.5% | 98.9% | 88.9% | 86.5% | 93.0% |
| 19.3 | 85.2% | 60.7% | 95.8% | 57.9% | 42.8% | 71.8% | 53.0% | 47.6% | 56.3% | 90.1% | 76.9% | 95.8% | 59.4% | 41.4% | 73.8% | 95.2% | 84.4% | 98.9% | 88.9% | 86.4% | 93.0% |
| 19.4 | 85.2% | 60.7% | 95.8% | 57.7% | 42.7% | 71.7% | 53.0% | 47.6% | 56.3% | 90.1% | 76.9% | 95.8% | 59.3% | 41.3% | 73.8% | 95.2% | 84.2% | 98.9% | 88.9% | 86.4% | 93.0% |
| 19.5 | 85.2% | 60.7% | 95.8% | 57.6% | 42.6% | 71.6% | 53.0% | 47.5% | 56.3% | 90.1% | 76.9% | 95.8% | 59.3% | 41.2% | 73.7% | 95.1% | 84.1% | 98.9% | 88.9% | 86.4% | 93.0% |
| 19.6 | 85.2% | 60.7% | 95.8% | 57.5% | 42.4% | 71.5% | 53.0% | 47.5% | 56.3% | 90.0% | 76.8% | 95.8% | 59.2% | 41.1% | 73.7% | 95.1% | 83.9% | 98.9% | 88.9% | 86.3% | 93.0% |
| 19.7 | 85.2% | 60.7% | 95.8% | 57.4% | 42.3% | 71.4% | 53.0% | 47.5% | 56.3% | 90.0% | 76.8% | 95.8% | 59.2% | 40.9% | 73.6% | 95.0% | 83.8% | 98.9% | 88.9% | 86.3% | 93.0% |
| 19.8 | 85.2% | 60.7% | 95.8% | 57.2% | 42.2% | 71.3% | 53.0% | 47.4% | 56.3% | 90.0% | 76.7% | 95.8% | 59.1% | 40.8% | 73.5% | 95.0% | 83.6% | 98.9% | 88.9% | 86.2% | 93.0% |
| 19.9 | 85.2% | 60.7% | 95.8% | 57.1% | 42.1% | 71.2% | 53.0% | 47.4% | 56.2% | 90.0% | 76.6% | 95.8% | 59.0% | 40.8% | 73.5% | 94.9% | 83.5% | 98.9% | 88.9% | 86.2% | 93.0% |
| 20   | 85.2% | 60.7% | 95.8% | 57.0% | 41.9% | 71.1% | 53.0% | 47.3% | 56.2% | 90.0% | 76.5% | 95.8% | 59.0% | 40.7% | 73.4% | 94.9% | 83.3% | 98.9% | 88.9% | 86.2% | 93.0% |
| 20.1 | 85.2% | 60.7% | 95.8% | 56.9% | 41.8% | 71.0% | 53.0% | 47.3% | 56.1% | 90.0% | 76.5% | 95.8% | 58.9% | 40.6% | 73.3% | 94.8% | 83.2% | 98.9% | 88.9% | 86.2% | 93.0% |
| 20.2 | 85.2% | 60.7% | 95.8% | 56.7% | 41.7% | 70.8% | 53.0% | 47.2% | 56.1% | 89.9% | 76.4% | 95.7% | 58.8% | 40.5% | 73.2% | 94.8% | 83.0% | 98.9% | 88.9% | 86.2% | 93.0% |
| 20.3 | 85.2% | 60.7% | 95.8% | 56.6% | 41.6% | 70.7% | 53.0% | 47.2% | 56.1% | 89.9% | 76.3% | 95.7% | 58.7% | 40.5% | 73.1% | 94.8% | 82.9% | 98.9% | 88.9% | 86.1% | 93.0% |
| 20.4 | 85.2% | 60.7% | 95.8% | 56.5% | 41.4% | 70.6% | 53.0% | 47.1% | 56.1% | 89.9% | 76.2% | 95.7% | 58.7% | 40.4% | 73.0% | 94.7% | 82.7% | 98.9% | 88.9% | 86.1% | 93.0% |
| 20.5 | 85.2% | 60.7% | 95.8% | 56.4% | 41.3% | 70.5% | 53.0% | 47.1% | 56.1% | 89.9% | 76.2% | 95.7% | 58.6% | 40.3% | 72.9% | 94.7% | 82.6% | 98.8% | 88.9% | 86.0% | 93.0% |
| 20.6 | 85.2% | 60.7% | 95.8% | 56.2% | 41.2% | 70.4% | 53.0% | 47.1% | 56.1% | 89.9% | 76.2% | 95.7% | 58.5% | 40.2% | 72.8% | 94.6% | 82.4% | 98.8% | 88.9% | 86.0% | 93.0% |
| 20.7 | 85.2% | 60.7% | 95.8% | 56.1% | 41.0% | 70.3% | 53.0% | 47.0% | 56.1% | 89.9% | 76.1% | 95.7% | 58.4% | 40.2% | 72.7% | 94.6% | 82.3% | 98.8% | 88.9% | 86.0% | 93.0% |
| 20.8 | 85.2% | 60.7% | 95.8% | 56.0% | 40.9% | 70.2% | 53.0% | 46.9% | 56.1% | 89.8% | 76.1% | 95.7% | 58.3% | 40.1% | 72.7% | 94.5% | 82.2% | 98.8% | 88.9% | 86.0% | 93.0% |
| 20.9 | 85.2% | 60.7% | 95.8% | 55.8% | 40.8% | 70.1% | 53.0% | 46.8% | 56.1% | 89.8% | 76.0% | 95.7% | 58.2% | 40.0% | 72.6% | 94.5% | 82.2% | 98.8% | 88.9% | 86.0% | 93.0% |
| 21   | 85.2% | 60.7% | 95.8% | 55.7% | 40.7% | 70.0% | 53.0% | 46.8% | 56.1% | 89.8% | 75.9% | 95.7% | 58.1% | 39.9% | 72.5% | 94.4% | 82.1% | 98.8% | 88.9% | 86.0% | 93.0% |
| 21.1 | 85.2% | 60.7% | 95.8% | 55.6% | 40.5% | 69.9% | 53.0% | 46.7% | 56.1% | 89.8% | 75.9% | 95.7% | 58.0% | 39.8% | 72.5% | 94.4% | 82.1% | 98.8% | 88.9% | 86.0% | 93.0% |
| 21.2 | 85.2% | 60.7% | 95.8% | 55.5% | 40.4% | 69.8% | 53.0% | 46.5% | 56.0% | 89.8% | 75.8% | 95.6% | 57.9% | 39.7% | 72.4% | 94.4% | 82.1% | 98.8% | 88.9% | 86.0% | 93.0% |
| 21.3 | 85.2% | 60.7% | 95.8% | 55.3% | 40.3% | 69.7% | 53.0% | 46.4% | 56.0% | 89.7% | 75.7% | 95.6% | 57.8% | 39.6% | 72.3% | 94.3% | 82.0% | 98.8% | 88.9% | 86.0% | 93.0% |
| 21.4 | 85.2% | 60.7% | 95.8% | 55.2% | 40.2% | 69.5% | 53.0% | 46.3% | 56.0% | 89.7% | 75.7% | 95.6% | 57.7% | 39.5% | 72.3% | 94.3% | 82.0% | 98.8% | 88.9% | 86.0% | 93.0% |
| 21.5 | 85.2% | 60.7% | 95.8% | 55.1% | 40.0% | 69.4% | 53.0% | 46.1% | 56.0% | 89.7% | 75.6% | 95.6% | 57.6% | 39.4% | 72.2% | 94.2% | 81.9% | 98.8% | 88.9% | 86.0% | 93.0% |
| 21.6 | 85.2% | 60.7% | 95.8% | 54.9% | 39.9% | 69.3% | 52.9% | 46.0% | 56.0% | 89.7% | 75.6% | 95.6% | 57.5% | 39.3% | 72.1% | 94.2% | 81.9% | 98.7% | 88.9% | 86.0% | 93.0% |
| 21.7 | 85.2% | 60.7% | 95.8% | 54.8% | 39.8% | 69.2% | 52.9% | 45.9% | 55.9% | 89.6% | 75.5% | 95.6% | 57.4% | 39.2% | 72.0% | 94.2% | 81.8% | 98.7% | 88.9% | 86.0% | 93.0% |

|      |       |       |       |       |       |       |       |       |       |       |       |       |       |       |       |       |       |       |       |       |       |
|------|-------|-------|-------|-------|-------|-------|-------|-------|-------|-------|-------|-------|-------|-------|-------|-------|-------|-------|-------|-------|-------|
| 21.8 | 85.2% | 60.7% | 95.8% | 54.7% | 39.6% | 69.1% | 52.9% | 45.7% | 55.9% | 89.6% | 75.4% | 95.6% | 57.3% | 39.0% | 72.0% | 94.1% | 81.7% | 98.7% | 88.9% | 86.0% | 93.0% |
| 21.9 | 85.2% | 60.7% | 95.8% | 54.5% | 39.5% | 69.0% | 52.9% | 45.7% | 55.9% | 89.6% | 75.4% | 95.6% | 57.2% | 38.9% | 71.9% | 94.1% | 81.7% | 98.7% | 88.9% | 86.0% | 93.0% |
| 22   | 85.2% | 60.7% | 95.8% | 54.4% | 39.4% | 68.9% | 52.8% | 45.6% | 55.9% | 89.6% | 75.3% | 95.6% | 57.1% | 38.7% | 71.8% | 94.0% | 81.6% | 98.7% | 88.9% | 86.0% | 93.0% |
| 22.1 | 85.2% | 60.7% | 95.8% | 54.3% | 39.3% | 68.7% | 52.8% | 45.4% | 55.8% | 89.5% | 75.2% | 95.5% | 57.0% | 38.6% | 71.7% | 94.0% | 81.6% | 98.7% | 88.9% | 86.0% | 93.0% |
| 22.2 | 85.2% | 60.7% | 95.8% | 54.1% | 39.2% | 68.6% | 52.8% | 45.3% | 55.8% | 89.5% | 75.2% | 95.5% | 56.8% | 38.4% | 71.6% | 94.0% | 81.5% | 98.7% | 88.9% | 86.0% | 93.0% |
| 22.3 | 85.2% | 60.7% | 95.8% | 54.0% | 39.0% | 68.5% | 52.7% | 45.2% | 55.7% | 89.5% | 75.1% | 95.5% | 56.7% | 38.3% | 71.5% | 93.9% | 81.4% | 98.7% | 88.9% | 86.0% | 93.0% |
| 22.4 | 85.2% | 60.7% | 95.8% | 53.9% | 38.9% | 68.4% | 52.7% | 45.1% | 55.7% | 89.5% | 75.0% | 95.5% | 56.6% | 38.2% | 71.4% | 93.9% | 81.3% | 98.7% | 88.9% | 86.0% | 93.0% |
| 22.5 | 85.2% | 60.7% | 95.8% | 53.7% | 38.8% | 68.3% | 52.6% | 45.0% | 55.6% | 89.4% | 75.0% | 95.5% | 56.5% | 38.0% | 71.3% | 93.8% | 81.2% | 98.7% | 88.9% | 86.0% | 93.0% |
| 22.6 | 85.2% | 60.7% | 95.8% | 53.6% | 38.7% | 68.2% | 52.6% | 44.9% | 55.5% | 89.4% | 74.9% | 95.5% | 56.3% | 37.9% | 71.2% | 93.8% | 81.1% | 98.7% | 88.9% | 86.0% | 92.9% |
| 22.7 | 85.2% | 60.7% | 95.8% | 53.5% | 38.6% | 68.0% | 52.5% | 44.8% | 55.5% | 89.4% | 74.8% | 95.5% | 56.2% | 37.7% | 71.1% | 93.8% | 81.0% | 98.7% | 88.9% | 86.0% | 92.9% |
| 22.8 | 85.2% | 60.7% | 95.8% | 53.3% | 38.5% | 67.9% | 52.5% | 44.6% | 55.4% | 89.3% | 74.8% | 95.5% | 56.1% | 37.6% | 70.9% | 93.7% | 80.9% | 98.7% | 88.9% | 86.0% | 92.9% |
| 22.9 | 85.2% | 60.7% | 95.8% | 53.2% | 38.4% | 67.8% | 52.4% | 44.5% | 55.4% | 89.3% | 74.7% | 95.5% | 55.9% | 37.4% | 70.8% | 93.7% | 80.8% | 98.7% | 88.9% | 86.0% | 92.9% |
| 23   | 85.2% | 60.7% | 95.8% | 53.0% | 38.2% | 67.7% | 52.3% | 44.4% | 55.3% | 89.3% | 74.6% | 95.4% | 55.8% | 37.3% | 70.7% | 93.7% | 80.7% | 98.7% | 88.9% | 86.0% | 92.9% |
| 23.1 | 85.2% | 60.7% | 95.8% | 52.9% | 38.1% | 67.5% | 52.3% | 44.2% | 55.2% | 89.3% | 74.5% | 95.4% | 55.7% | 37.1% | 70.6% | 93.6% | 80.6% | 98.7% | 88.9% | 86.0% | 92.9% |
| 23.2 | 85.2% | 60.7% | 95.8% | 52.8% | 38.0% | 67.4% | 52.2% | 44.1% | 55.2% | 89.2% | 74.5% | 95.4% | 55.5% | 37.0% | 70.5% | 93.6% | 80.5% | 98.6% | 88.9% | 86.0% | 92.9% |
| 23.3 | 85.2% | 60.7% | 95.8% | 52.6% | 37.9% | 67.3% | 52.1% | 44.0% | 55.1% | 89.2% | 74.4% | 95.4% | 55.4% | 36.8% | 70.4% | 93.6% | 80.5% | 98.6% | 88.9% | 86.0% | 92.9% |
| 23.4 | 85.2% | 60.7% | 95.8% | 52.5% | 37.8% | 67.2% | 52.1% | 43.9% | 55.0% | 89.2% | 74.3% | 95.4% | 55.2% | 36.7% | 70.3% | 93.5% | 80.4% | 98.6% | 88.9% | 86.0% | 92.9% |
| 23.5 | 85.2% | 60.7% | 95.8% | 52.3% | 37.6% | 67.1% | 52.0% | 43.7% | 54.9% | 89.1% | 74.3% | 95.4% | 55.1% | 36.6% | 70.2% | 93.5% | 80.3% | 98.6% | 88.9% | 86.0% | 92.9% |
| 23.6 | 85.2% | 60.7% | 95.8% | 52.2% | 37.5% | 66.9% | 51.9% | 43.7% | 54.8% | 89.1% | 74.2% | 95.4% | 54.9% | 36.4% | 70.1% | 93.5% | 80.2% | 98.6% | 88.9% | 86.0% | 92.9% |
| 23.7 | 85.2% | 60.7% | 95.8% | 52.1% | 37.4% | 66.8% | 51.8% | 43.6% | 54.6% | 89.1% | 74.1% | 95.4% | 54.7% | 36.3% | 70.0% | 93.5% | 80.1% | 98.6% | 88.9% | 86.0% | 92.9% |
| 23.8 | 85.2% | 60.7% | 95.8% | 51.9% | 37.3% | 66.7% | 51.7% | 43.6% | 54.5% | 89.0% | 74.1% | 95.3% | 54.6% | 36.2% | 69.8% | 93.4% | 80.0% | 98.6% | 88.9% | 86.0% | 92.9% |
| 23.9 | 85.2% | 60.7% | 95.8% | 51.8% | 37.2% | 66.5% | 51.7% | 43.5% | 54.4% | 89.0% | 74.0% | 95.3% | 54.4% | 36.0% | 69.7% | 93.4% | 79.9% | 98.6% | 88.9% | 86.0% | 92.9% |
| 24   | 85.2% | 60.7% | 95.8% | 51.6% | 37.0% | 66.4% | 51.6% | 43.4% | 54.3% | 89.0% | 73.9% | 95.3% | 54.3% | 35.9% | 69.6% | 93.4% | 79.9% | 98.6% | 88.9% | 86.0% | 92.9% |
| 24.1 | 85.2% | 60.7% | 95.8% | 51.5% | 36.9% | 66.3% | 51.5% | 43.2% | 54.2% | 88.9% | 73.8% | 95.3% | 54.1% | 35.8% | 69.4% | 93.3% | 79.8% | 98.6% | 88.9% | 86.0% | 92.9% |
| 24.2 | 85.2% | 60.7% | 95.8% | 51.4% | 36.8% | 66.2% | 51.4% | 43.1% | 54.1% | 88.9% | 73.8% | 95.3% | 53.9% | 35.6% | 69.3% | 93.3% | 79.7% | 98.6% | 88.9% | 86.0% | 92.9% |
| 24.3 | 85.2% | 60.7% | 95.8% | 51.2% | 36.7% | 66.0% | 51.3% | 43.1% | 54.0% | 88.8% | 73.7% | 95.3% | 53.8% | 35.5% | 69.1% | 93.3% | 79.6% | 98.6% | 88.9% | 86.0% | 92.9% |
| 24.4 | 85.2% | 60.7% | 95.8% | 51.1% | 36.6% | 65.9% | 51.2% | 43.0% | 53.9% | 88.8% | 73.6% | 95.3% | 53.6% | 35.4% | 69.0% | 93.3% | 79.6% | 98.6% | 88.9% | 86.0% | 92.9% |
| 24.5 | 85.2% | 60.7% | 95.8% | 50.9% | 36.4% | 65.8% | 51.1% | 42.9% | 53.8% | 88.8% | 73.6% | 95.3% | 53.4% | 35.2% | 68.8% | 93.2% | 79.5% | 98.6% | 88.9% | 86.0% | 92.9% |
| 24.6 | 85.2% | 60.7% | 95.8% | 50.8% | 36.3% | 65.6% | 50.9% | 42.8% | 53.7% | 88.7% | 73.5% | 95.2% | 53.2% | 35.1% | 68.7% | 93.2% | 79.4% | 98.6% | 88.9% | 86.0% | 92.9% |
| 24.7 | 85.2% | 60.7% | 95.8% | 50.6% | 36.2% | 65.5% | 50.8% | 42.7% | 53.5% | 88.7% | 73.4% | 95.2% | 53.0% | 34.9% | 68.5% | 93.2% | 79.3% | 98.6% | 88.9% | 86.0% | 92.9% |
| 24.8 | 85.2% | 60.7% | 95.8% | 50.5% | 36.1% | 65.4% | 50.7% | 42.6% | 53.4% | 88.6% | 73.3% | 95.2% | 52.9% | 34.8% | 68.3% | 93.2% | 79.2% | 98.5% | 88.9% | 86.0% | 92.8% |
| 24.9 | 85.2% | 60.7% | 95.8% | 50.4% | 36.0% | 65.2% | 50.6% | 42.5% | 53.2% | 88.6% | 73.2% | 95.2% | 52.7% | 34.7% | 68.2% | 93.2% | 79.0% | 98.5% | 88.9% | 86.0% | 92.8% |

|      |       |       |       |       |       |       |       |       |       |       |       |       |       |       |       |       |       |       |       |       |       |
|------|-------|-------|-------|-------|-------|-------|-------|-------|-------|-------|-------|-------|-------|-------|-------|-------|-------|-------|-------|-------|-------|
| 25   | 85.2% | 60.7% | 95.8% | 50.2% | 35.8% | 65.1% | 50.5% | 42.4% | 53.1% | 88.6% | 73.2% | 95.2% | 52.5% | 34.5% | 68.0% | 93.1% | 79.0% | 98.5% | 88.9% | 86.0% | 92.8% |
| 25.1 | 85.2% | 60.7% | 95.8% | 50.1% | 35.7% | 65.0% | 50.4% | 42.4% | 52.9% | 88.5% | 73.1% | 95.2% | 52.3% | 34.3% | 67.8% | 93.1% | 79.0% | 98.5% | 88.9% | 86.0% | 92.8% |
| 25.2 | 85.2% | 60.7% | 95.8% | 49.9% | 35.6% | 64.8% | 50.2% | 42.3% | 52.8% | 88.5% | 73.0% | 95.1% | 52.1% | 34.1% | 67.6% | 93.1% | 78.9% | 98.5% | 88.9% | 86.0% | 92.8% |
| 25.3 | 85.2% | 60.7% | 95.8% | 49.8% | 35.5% | 64.7% | 50.1% | 42.2% | 52.7% | 88.4% | 72.9% | 95.1% | 51.9% | 33.9% | 67.5% | 93.1% | 78.8% | 98.5% | 88.9% | 85.9% | 92.8% |
| 25.4 | 85.2% | 60.7% | 95.8% | 49.6% | 35.3% | 64.5% | 50.0% | 42.1% | 52.5% | 88.4% | 72.8% | 95.1% | 51.7% | 33.7% | 67.3% | 93.1% | 78.8% | 98.5% | 88.9% | 85.9% | 92.8% |
| 25.5 | 85.2% | 60.7% | 95.8% | 49.5% | 35.2% | 64.4% | 49.8% | 42.0% | 52.3% | 88.3% | 72.7% | 95.1% | 51.5% | 33.5% | 67.1% | 93.1% | 78.7% | 98.5% | 88.9% | 85.9% | 92.8% |
| 25.6 | 85.2% | 60.7% | 95.8% | 49.3% | 35.1% | 64.3% | 49.7% | 41.9% | 52.2% | 88.3% | 72.6% | 95.1% | 51.3% | 33.3% | 66.9% | 93.0% | 78.7% | 98.5% | 88.9% | 85.9% | 92.8% |
| 25.7 | 85.2% | 60.7% | 95.8% | 49.2% | 35.0% | 64.1% | 49.6% | 41.8% | 52.0% | 88.3% | 72.5% | 95.0% | 51.1% | 33.2% | 66.7% | 93.0% | 78.6% | 98.5% | 88.9% | 85.9% | 92.8% |
| 25.8 | 85.2% | 60.7% | 95.7% | 49.0% | 34.8% | 64.0% | 49.4% | 41.7% | 51.8% | 88.2% | 72.4% | 95.0% | 50.9% | 33.0% | 66.5% | 93.0% | 78.5% | 98.5% | 88.9% | 85.9% | 92.8% |
| 25.9 | 85.2% | 60.6% | 95.7% | 48.9% | 34.7% | 63.8% | 49.3% | 41.6% | 51.7% | 88.2% | 72.3% | 95.0% | 50.7% | 32.8% | 66.3% | 93.0% | 78.5% | 98.4% | 88.9% | 85.9% | 92.8% |
| 26   | 85.2% | 60.6% | 95.7% | 48.7% | 34.6% | 63.7% | 49.1% | 41.6% | 51.5% | 88.1% | 72.2% | 95.0% | 50.5% | 32.7% | 66.1% | 93.0% | 78.5% | 98.4% | 88.9% | 85.9% | 92.8% |
| 26.1 | 85.2% | 60.6% | 95.7% | 48.6% | 34.5% | 63.6% | 49.0% | 41.5% | 51.3% | 88.1% | 72.1% | 95.0% | 50.2% | 32.5% | 66.0% | 93.0% | 78.5% | 98.4% | 88.9% | 85.9% | 92.8% |
| 26.2 | 85.1% | 60.6% | 95.7% | 48.4% | 34.3% | 63.4% | 48.8% | 41.4% | 51.2% | 88.0% | 72.0% | 95.0% | 50.0% | 32.4% | 65.8% | 93.0% | 78.5% | 98.4% | 88.9% | 85.9% | 92.8% |
| 26.3 | 85.1% | 60.6% | 95.7% | 48.3% | 34.2% | 63.3% | 48.6% | 41.4% | 51.0% | 88.0% | 72.0% | 94.9% | 49.8% | 32.2% | 65.6% | 93.0% | 78.4% | 98.4% | 88.9% | 85.9% | 92.8% |
| 26.4 | 85.1% | 60.5% | 95.7% | 48.1% | 34.1% | 63.1% | 48.5% | 41.3% | 50.9% | 87.9% | 71.9% | 94.9% | 49.6% | 32.1% | 65.4% | 92.9% | 78.3% | 98.4% | 88.9% | 85.9% | 92.8% |
| 26.5 | 85.1% | 60.5% | 95.7% | 48.0% | 34.0% | 63.0% | 48.3% | 41.3% | 50.7% | 87.9% | 71.9% | 94.9% | 49.4% | 31.9% | 65.2% | 92.9% | 78.2% | 98.4% | 88.9% | 85.9% | 92.8% |
| 26.6 | 85.1% | 60.5% | 95.7% | 47.8% | 33.8% | 62.8% | 48.1% | 41.2% | 50.6% | 87.8% | 71.8% | 94.9% | 49.1% | 31.7% | 65.0% | 92.9% | 78.2% | 98.4% | 88.9% | 85.9% | 92.8% |
| 26.7 | 85.1% | 60.5% | 95.7% | 47.7% | 33.7% | 62.7% | 48.0% | 41.1% | 50.4% | 87.8% | 71.7% | 94.9% | 48.9% | 31.6% | 64.8% | 92.9% | 78.1% | 98.4% | 88.9% | 85.9% | 92.8% |
| 26.8 | 85.1% | 60.5% | 95.7% | 47.5% | 33.6% | 62.5% | 47.8% | 41.1% | 50.3% | 87.7% | 71.6% | 94.8% | 48.7% | 31.4% | 64.7% | 92.9% | 78.1% | 98.4% | 88.9% | 85.9% | 92.8% |
| 26.9 | 85.1% | 60.4% | 95.7% | 47.4% | 33.4% | 62.4% | 47.6% | 41.0% | 50.1% | 87.7% | 71.5% | 94.8% | 48.4% | 31.3% | 64.5% | 92.9% | 78.1% | 98.4% | 88.9% | 85.9% | 92.8% |
| 27   | 85.1% | 60.4% | 95.7% | 47.2% | 33.3% | 62.3% | 47.4% | 41.0% | 49.9% | 87.6% | 71.4% | 94.8% | 48.2% | 31.1% | 64.3% | 92.9% | 78.1% | 98.4% | 88.9% | 85.9% | 92.8% |
| 27.1 | 85.1% | 60.4% | 95.7% | 47.1% | 33.2% | 62.1% | 47.3% | 40.9% | 49.9% | 87.6% | 71.3% | 94.8% | 48.0% | 30.9% | 64.2% | 92.9% | 78.0% | 98.4% | 88.9% | 85.9% | 92.8% |
| 27.2 | 85.0% | 60.3% | 95.7% | 46.9% | 33.1% | 62.0% | 47.1% | 40.9% | 49.6% | 87.5% | 71.2% | 94.8% | 47.8% | 30.7% | 64.0% | 92.9% | 78.0% | 98.4% | 88.9% | 85.9% | 92.8% |
| 27.3 | 85.0% | 60.3% | 95.7% | 46.8% | 32.9% | 61.8% | 46.9% | 40.8% | 49.5% | 87.5% | 71.2% | 94.8% | 47.5% | 30.6% | 63.8% | 92.9% | 78.0% | 98.4% | 88.9% | 85.9% | 92.7% |
| 27.4 | 85.0% | 60.3% | 95.7% | 46.6% | 32.8% | 61.7% | 46.7% | 40.7% | 49.4% | 87.4% | 71.1% | 94.7% | 47.3% | 30.4% | 63.7% | 92.9% | 78.0% | 98.4% | 88.9% | 85.9% | 92.7% |
| 27.5 | 85.0% | 60.3% | 95.7% | 46.5% | 32.7% | 61.5% | 46.5% | 40.6% | 49.2% | 87.3% | 71.0% | 94.7% | 47.1% | 30.2% | 63.5% | 92.9% | 78.0% | 98.4% | 88.9% | 85.9% | 92.7% |
| 27.6 | 85.0% | 60.2% | 95.7% | 46.3% | 32.5% | 61.3% | 46.3% | 40.5% | 49.1% | 87.3% | 70.9% | 94.7% | 46.9% | 30.0% | 63.4% | 92.9% | 78.0% | 98.4% | 88.9% | 85.9% | 92.7% |
| 27.7 | 85.0% | 60.2% | 95.7% | 46.2% | 32.4% | 61.2% | 46.1% | 40.5% | 49.0% | 87.2% | 70.8% | 94.7% | 46.7% | 29.9% | 63.2% | 92.9% | 78.0% | 98.4% | 88.9% | 85.9% | 92.7% |
| 27.8 | 85.0% | 60.2% | 95.7% | 46.0% | 32.3% | 61.0% | 45.9% | 40.4% | 48.8% | 87.2% | 70.6% | 94.7% | 46.5% | 29.7% | 63.1% | 92.9% | 78.0% | 98.4% | 88.9% | 85.9% | 92.7% |
| 27.9 | 84.9% | 60.1% | 95.7% | 45.9% | 32.2% | 60.9% | 45.7% | 40.3% | 48.6% | 87.1% | 70.6% | 94.6% | 46.3% | 29.6% | 62.9% | 92.9% | 78.0% | 98.4% | 88.9% | 85.9% | 92.7% |
| 28   | 84.9% | 60.1% | 95.7% | 45.7% | 32.0% | 60.7% | 45.5% | 40.3% | 48.4% | 87.1% | 70.5% | 94.6% | 46.1% | 29.5% | 62.8% | 92.9% | 78.0% | 98.4% | 88.9% | 85.9% | 92.7% |
| 28.1 | 84.9% | 60.0% | 95.7% | 45.6% | 31.9% | 60.6% | 45.3% | 40.2% | 48.2% | 87.0% | 70.4% | 94.6% | 45.9% | 29.3% | 62.6% | 92.9% | 78.0% | 98.4% | 88.9% | 85.9% | 92.7% |

|      |       |       |       |       |       |       |       |       |       |       |       |       |       |       |       |       |       |       |       |       |       |
|------|-------|-------|-------|-------|-------|-------|-------|-------|-------|-------|-------|-------|-------|-------|-------|-------|-------|-------|-------|-------|-------|
| 28.2 | 84.9% | 60.0% | 95.7% | 45.4% | 31.8% | 60.4% | 45.1% | 40.1% | 48.1% | 87.0% | 70.3% | 94.5% | 45.7% | 29.2% | 62.4% | 92.9% | 78.0% | 98.4% | 88.9% | 85.9% | 92.7% |
| 28.3 | 84.9% | 60.0% | 95.7% | 45.2% | 31.6% | 60.3% | 44.8% | 40.0% | 47.9% | 86.9% | 70.2% | 94.5% | 45.5% | 29.1% | 62.2% | 92.9% | 77.9% | 98.4% | 88.9% | 85.9% | 92.6% |
| 28.4 | 84.9% | 59.9% | 95.7% | 45.1% | 31.5% | 60.1% | 44.6% | 39.9% | 47.7% | 86.8% | 70.1% | 94.5% | 45.3% | 29.0% | 62.0% | 92.9% | 77.9% | 98.4% | 88.9% | 85.9% | 92.6% |
| 28.5 | 84.8% | 59.9% | 95.6% | 44.9% | 31.4% | 59.9% | 44.4% | 39.8% | 47.6% | 86.8% | 70.0% | 94.5% | 45.1% | 28.9% | 61.9% | 92.9% | 77.9% | 98.4% | 88.9% | 85.9% | 92.5% |
| 28.6 | 84.8% | 59.9% | 95.6% | 44.8% | 31.2% | 59.8% | 44.2% | 39.8% | 47.5% | 86.7% | 69.9% | 94.4% | 44.9% | 28.8% | 61.7% | 92.9% | 77.8% | 98.4% | 88.9% | 85.9% | 92.5% |
| 28.7 | 84.8% | 59.8% | 95.6% | 44.6% | 31.1% | 59.6% | 44.0% | 39.6% | 47.3% | 86.7% | 69.8% | 94.4% | 44.7% | 28.7% | 61.5% | 92.9% | 77.8% | 98.4% | 88.9% | 85.9% | 92.5% |
| 28.8 | 84.8% | 59.8% | 95.6% | 44.5% | 31.0% | 59.5% | 43.8% | 39.6% | 47.1% | 86.6% | 69.7% | 94.4% | 44.5% | 28.5% | 61.3% | 92.9% | 77.8% | 98.4% | 88.9% | 85.9% | 92.5% |
| 28.9 | 84.8% | 59.8% | 95.6% | 44.3% | 30.9% | 59.3% | 43.6% | 39.4% | 47.0% | 86.6% | 69.6% | 94.4% | 44.3% | 28.4% | 61.2% | 92.9% | 77.8% | 98.4% | 88.9% | 85.9% | 92.5% |
| 29   | 84.7% | 59.7% | 95.6% | 44.2% | 30.7% | 59.1% | 43.4% | 39.2% | 46.8% | 86.5% | 69.5% | 94.3% | 44.2% | 28.2% | 61.0% | 92.9% | 77.8% | 98.4% | 88.9% | 85.9% | 92.5% |
| 29.1 | 84.7% | 59.7% | 95.6% | 44.0% | 30.6% | 59.0% | 43.2% | 39.2% | 46.7% | 86.4% | 69.5% | 94.3% | 44.0% | 28.1% | 60.8% | 92.9% | 77.8% | 98.4% | 88.9% | 85.9% | 92.5% |
| 29.2 | 84.7% | 59.6% | 95.6% | 43.8% | 30.5% | 58.8% | 43.0% | 39.0% | 46.6% | 86.4% | 69.4% | 94.3% | 43.8% | 28.0% | 60.7% | 92.9% | 77.8% | 98.4% | 88.9% | 85.9% | 92.4% |
| 29.3 | 84.7% | 59.6% | 95.6% | 43.7% | 30.4% | 58.7% | 42.8% | 38.8% | 46.5% | 86.3% | 69.3% | 94.2% | 43.6% | 27.8% | 60.5% | 92.9% | 77.8% | 98.4% | 88.9% | 85.9% | 92.4% |
| 29.4 | 84.6% | 59.6% | 95.6% | 43.5% | 30.3% | 58.5% | 42.7% | 38.6% | 46.3% | 86.3% | 69.2% | 94.2% | 43.5% | 27.7% | 60.4% | 92.9% | 77.8% | 98.4% | 88.9% | 85.9% | 92.4% |
| 29.5 | 84.6% | 59.5% | 95.6% | 43.4% | 30.2% | 58.4% | 42.5% | 38.6% | 46.2% | 86.2% | 69.1% | 94.2% | 43.3% | 27.6% | 60.2% | 92.9% | 77.8% | 98.4% | 88.9% | 85.9% | 92.4% |
| 29.6 | 84.6% | 59.5% | 95.6% | 43.3% | 30.1% | 58.3% | 42.3% | 38.4% | 46.0% | 86.1% | 69.0% | 94.2% | 43.1% | 27.4% | 60.1% | 92.9% | 77.8% | 98.4% | 88.9% | 85.9% | 92.4% |
| 29.7 | 84.6% | 59.4% | 95.6% | 43.1% | 29.9% | 58.1% | 42.1% | 38.2% | 45.9% | 86.1% | 68.9% | 94.1% | 43.0% | 27.3% | 59.9% | 92.9% | 77.8% | 98.4% | 88.9% | 85.9% | 92.4% |
| 29.8 | 84.5% | 59.4% | 95.6% | 43.0% | 29.8% | 58.0% | 41.9% | 38.1% | 45.8% | 86.0% | 68.8% | 94.1% | 42.8% | 27.2% | 59.7% | 92.9% | 77.7% | 98.4% | 88.9% | 85.9% | 92.3% |
| 29.9 | 84.5% | 59.3% | 95.5% | 42.8% | 29.7% | 57.9% | 41.8% | 37.9% | 45.7% | 86.0% | 68.7% | 94.1% | 42.7% | 27.1% | 59.6% | 92.9% | 77.5% | 98.3% | 88.9% | 85.9% | 92.3% |
| 30   | 84.5% | 59.3% | 95.5% | 42.7% | 29.6% | 57.8% | 41.6% | 37.7% | 45.6% | 85.9% | 68.7% | 94.1% | 42.5% | 27.0% | 59.5% | 92.9% | 77.4% | 98.3% | 88.9% | 85.9% | 92.3% |
| 30.1 | 84.4% | 59.2% | 95.5% | 42.6% | 29.5% | 57.6% | 41.4% | 37.6% | 45.4% | 85.8% | 68.6% | 94.0% | 42.3% | 26.8% | 59.3% | 92.9% | 77.4% | 98.3% | 88.9% | 85.9% | 92.3% |
| 30.2 | 84.4% | 59.2% | 95.5% | 42.4% | 29.4% | 57.5% | 41.3% | 37.4% | 45.4% | 85.8% | 68.5% | 94.0% | 42.2% | 26.7% | 59.2% | 92.9% | 77.3% | 98.3% | 88.9% | 85.9% | 92.3% |
| 30.3 | 84.4% | 59.1% | 95.5% | 42.3% | 29.3% | 57.4% | 41.1% | 37.3% | 45.3% | 85.7% | 68.4% | 94.0% | 42.1% | 26.6% | 59.0% | 92.9% | 77.2% | 98.3% | 88.9% | 85.9% | 92.3% |
| 30.4 | 84.4% | 59.1% | 95.5% | 42.1% | 29.2% | 57.3% | 41.0% | 37.2% | 45.1% | 85.7% | 68.3% | 93.9% | 41.9% | 26.5% | 58.9% | 92.9% | 77.1% | 98.3% | 88.9% | 85.9% | 92.2% |
| 30.5 | 84.3% | 59.0% | 95.5% | 42.0% | 29.1% | 57.1% | 40.8% | 37.0% | 45.0% | 85.6% | 68.2% | 93.9% | 41.8% | 26.4% | 58.8% | 92.9% | 77.0% | 98.3% | 88.9% | 85.9% | 92.2% |
| 30.6 | 84.3% | 59.0% | 95.5% | 41.9% | 29.0% | 57.0% | 40.7% | 36.9% | 44.9% | 85.5% | 68.1% | 93.9% | 41.6% | 26.3% | 58.6% | 92.9% | 76.9% | 98.3% | 88.9% | 85.9% | 92.2% |
| 30.7 | 84.3% | 58.9% | 95.5% | 41.8% | 28.9% | 56.9% | 40.5% | 36.7% | 44.9% | 85.5% | 67.9% | 93.9% | 41.5% | 26.2% | 58.5% | 92.9% | 76.8% | 98.3% | 88.9% | 85.9% | 92.1% |
| 30.8 | 84.2% | 58.8% | 95.5% | 41.6% | 28.8% | 56.8% | 40.4% | 36.6% | 44.8% | 85.4% | 67.8% | 93.8% | 41.4% | 26.1% | 58.3% | 92.9% | 76.7% | 98.3% | 88.9% | 85.9% | 92.1% |
| 30.9 | 84.2% | 58.8% | 95.5% | 41.5% | 28.7% | 56.7% | 40.3% | 36.5% | 44.6% | 85.3% | 67.7% | 93.8% | 41.2% | 26.0% | 58.2% | 92.9% | 76.6% | 98.3% | 88.9% | 85.9% | 92.1% |
| 31   | 84.2% | 58.7% | 95.4% | 41.4% | 28.6% | 56.6% | 40.1% | 36.3% | 44.5% | 85.3% | 67.6% | 93.8% | 41.1% | 25.9% | 58.1% | 92.8% | 76.6% | 98.3% | 88.9% | 85.9% | 92.1% |
| 31.1 | 84.1% | 58.7% | 95.4% | 41.3% | 28.6% | 56.5% | 40.0% | 36.1% | 44.4% | 85.2% | 67.5% | 93.7% | 41.0% | 25.8% | 57.9% | 92.8% | 76.6% | 98.3% | 88.9% | 85.9% | 92.1% |
| 31.2 | 84.1% | 58.6% | 95.4% | 41.1% | 28.5% | 56.3% | 39.9% | 36.0% | 44.3% | 85.2% | 67.4% | 93.7% | 40.8% | 25.7% | 57.8% | 92.8% | 76.5% | 98.3% | 88.9% | 85.9% | 92.1% |
| 31.3 | 84.1% | 58.5% | 95.4% | 41.0% | 28.4% | 56.2% | 39.7% | 35.8% | 44.2% | 85.1% | 67.3% | 93.7% | 40.7% | 25.6% | 57.7% | 92.8% | 76.4% | 98.3% | 88.9% | 85.9% | 92.1% |

|      |       |       |       |       |       |       |       |       |       |       |       |       |       |       |       |       |       |       |       |       |       |
|------|-------|-------|-------|-------|-------|-------|-------|-------|-------|-------|-------|-------|-------|-------|-------|-------|-------|-------|-------|-------|-------|
| 31.4 | 84.0% | 58.5% | 95.4% | 40.9% | 28.3% | 56.1% | 39.6% | 35.7% | 44.1% | 85.0% | 67.1% | 93.7% | 40.6% | 25.5% | 57.5% | 92.8% | 76.3% | 98.3% | 88.9% | 85.9% | 92.1% |
| 31.5 | 84.0% | 58.4% | 95.4% | 40.8% | 28.2% | 56.0% | 39.5% | 35.6% | 44.0% | 85.0% | 67.0% | 93.6% | 40.5% | 25.4% | 57.4% | 92.8% | 76.1% | 98.3% | 88.9% | 85.9% | 92.1% |
| 31.6 | 84.0% | 58.4% | 95.4% | 40.7% | 28.1% | 55.9% | 39.4% | 35.5% | 43.9% | 84.9% | 66.9% | 93.6% | 40.4% | 25.4% | 57.3% | 92.8% | 76.0% | 98.3% | 88.9% | 85.9% | 92.0% |
| 31.7 | 83.9% | 58.3% | 95.4% | 40.6% | 28.0% | 55.8% | 39.3% | 35.4% | 43.9% | 84.8% | 66.8% | 93.6% | 40.3% | 25.3% | 57.2% | 92.8% | 75.9% | 98.2% | 88.9% | 85.9% | 92.0% |
| 31.8 | 83.9% | 58.2% | 95.4% | 40.4% | 27.9% | 55.7% | 39.1% | 35.2% | 43.8% | 84.8% | 66.7% | 93.6% | 40.1% | 25.2% | 57.1% | 92.8% | 75.8% | 98.2% | 88.9% | 85.9% | 92.0% |
| 31.9 | 83.8% | 58.2% | 95.3% | 40.3% | 27.9% | 55.6% | 39.0% | 35.1% | 43.7% | 84.7% | 66.6% | 93.6% | 40.0% | 25.1% | 57.0% | 92.8% | 75.7% | 98.2% | 88.9% | 85.9% | 92.0% |
| 32   | 83.8% | 58.1% | 95.3% | 40.2% | 27.8% | 55.5% | 38.9% | 35.0% | 43.7% | 84.6% | 66.4% | 93.5% | 39.9% | 25.0% | 56.9% | 92.7% | 75.6% | 98.2% | 88.9% | 85.9% | 91.9% |
| 32.1 | 83.8% | 58.0% | 95.3% | 40.1% | 27.7% | 55.4% | 38.8% | 34.8% | 43.6% | 84.6% | 66.3% | 93.5% | 39.8% | 25.0% | 56.8% | 92.7% | 75.5% | 98.2% | 88.9% | 85.9% | 91.9% |
| 32.2 | 83.7% | 57.9% | 95.3% | 40.0% | 27.6% | 55.3% | 38.7% | 34.7% | 43.5% | 84.5% | 66.2% | 93.5% | 39.7% | 24.9% | 56.7% | 92.7% | 75.4% | 98.2% | 88.9% | 85.9% | 91.9% |
| 32.3 | 83.7% | 57.9% | 95.3% | 39.9% | 27.5% | 55.2% | 38.6% | 34.6% | 43.5% | 84.4% | 66.1% | 93.4% | 39.6% | 24.8% | 56.6% | 92.7% | 75.3% | 98.2% | 88.9% | 85.9% | 91.9% |
| 32.4 | 83.6% | 57.8% | 95.3% | 39.8% | 27.5% | 55.1% | 38.5% | 34.5% | 43.4% | 84.3% | 66.0% | 93.4% | 39.5% | 24.7% | 56.5% | 92.7% | 75.2% | 98.2% | 88.9% | 85.9% | 91.9% |
| 32.5 | 83.6% | 57.7% | 95.3% | 39.7% | 27.4% | 55.0% | 38.4% | 34.4% | 43.3% | 84.3% | 65.9% | 93.4% | 39.4% | 24.7% | 56.4% | 92.7% | 75.1% | 98.1% | 88.9% | 85.8% | 91.9% |
| 32.6 | 83.5% | 57.7% | 95.3% | 39.6% | 27.3% | 54.9% | 38.4% | 34.3% | 43.3% | 84.2% | 65.7% | 93.4% | 39.4% | 24.6% | 56.3% | 92.7% | 75.1% | 98.1% | 88.9% | 85.8% | 91.9% |
| 32.7 | 83.5% | 57.6% | 95.2% | 39.5% | 27.2% | 54.8% | 38.3% | 34.1% | 43.2% | 84.1% | 65.6% | 93.3% | 39.3% | 24.5% | 56.2% | 92.6% | 75.0% | 98.1% | 88.9% | 85.8% | 91.9% |
| 32.8 | 83.5% | 57.5% | 95.2% | 39.4% | 27.2% | 54.7% | 38.2% | 33.9% | 43.2% | 84.1% | 65.5% | 93.3% | 39.2% | 24.5% | 56.1% | 92.6% | 74.9% | 98.1% | 88.9% | 85.8% | 91.9% |
| 32.9 | 83.4% | 57.4% | 95.2% | 39.3% | 27.1% | 54.6% | 38.1% | 33.8% | 43.2% | 84.0% | 65.3% | 93.2% | 39.1% | 24.4% | 56.0% | 92.6% | 74.8% | 98.1% | 88.9% | 85.8% | 91.9% |
| 33   | 83.4% | 57.3% | 95.2% | 39.2% | 27.0% | 54.5% | 38.0% | 33.8% | 43.1% | 83.9% | 65.2% | 93.2% | 39.0% | 24.3% | 55.9% | 92.6% | 74.8% | 98.1% | 88.9% | 85.8% | 91.9% |
| 33.1 | 83.3% | 57.3% | 95.2% | 39.1% | 27.0% | 54.5% | 38.0% | 33.7% | 43.1% | 83.9% | 65.1% | 93.2% | 38.9% | 24.3% | 55.8% | 92.6% | 74.7% | 98.1% | 88.9% | 85.8% | 91.8% |
| 33.2 | 83.3% | 57.2% | 95.2% | 39.0% | 26.9% | 54.4% | 37.9% | 33.5% | 43.1% | 83.8% | 64.9% | 93.1% | 38.9% | 24.2% | 55.8% | 92.5% | 74.6% | 98.1% | 88.9% | 85.8% | 91.8% |
| 33.3 | 83.2% | 57.1% | 95.2% | 38.9% | 26.8% | 54.3% | 37.8% | 33.4% | 43.0% | 83.7% | 64.8% | 93.1% | 38.8% | 24.2% | 55.7% | 92.5% | 74.5% | 98.1% | 88.9% | 85.8% | 91.8% |
| 33.4 | 83.2% | 57.0% | 95.1% | 38.9% | 26.7% | 54.2% | 37.7% | 33.2% | 43.0% | 83.6% | 64.6% | 93.1% | 38.7% | 24.1% | 55.6% | 92.5% | 74.5% | 98.1% | 88.9% | 85.8% | 91.8% |
| 33.5 | 83.1% | 56.9% | 95.1% | 38.8% | 26.7% | 54.1% | 37.7% | 33.1% | 42.9% | 83.6% | 64.5% | 93.0% | 38.6% | 24.1% | 55.5% | 92.5% | 74.4% | 98.1% | 88.9% | 85.8% | 91.8% |
| 33.6 | 83.1% | 56.8% | 95.1% | 38.7% | 26.6% | 54.0% | 37.6% | 33.0% | 42.9% | 83.5% | 64.4% | 93.0% | 38.6% | 24.0% | 55.5% | 92.5% | 74.3% | 98.1% | 88.9% | 85.8% | 91.8% |
| 33.7 | 83.0% | 56.8% | 95.1% | 38.6% | 26.6% | 53.9% | 37.6% | 32.8% | 42.8% | 83.4% | 64.2% | 93.0% | 38.5% | 24.0% | 55.4% | 92.4% | 74.3% | 98.1% | 88.9% | 85.8% | 91.8% |
| 33.8 | 83.0% | 56.7% | 95.1% | 38.5% | 26.5% | 53.8% | 37.5% | 32.7% | 42.7% | 83.3% | 64.1% | 92.9% | 38.4% | 23.9% | 55.3% | 92.4% | 74.2% | 98.1% | 88.9% | 85.8% | 91.8% |
| 33.9 | 82.9% | 56.6% | 95.1% | 38.4% | 26.4% | 53.8% | 37.5% | 32.6% | 42.7% | 83.3% | 63.9% | 92.9% | 38.4% | 23.9% | 55.2% | 92.4% | 74.2% | 98.1% | 88.9% | 85.8% | 91.8% |
| 34   | 82.9% | 56.5% | 95.0% | 38.4% | 26.4% | 53.7% | 37.4% | 32.5% | 42.7% | 83.2% | 63.8% | 92.9% | 38.3% | 23.8% | 55.2% | 92.4% | 74.1% | 98.0% | 88.9% | 85.8% | 91.7% |
| 34.1 | 82.8% | 56.4% | 95.0% | 38.3% | 26.3% | 53.6% | 37.4% | 32.5% | 42.7% | 83.1% | 63.6% | 92.8% | 38.3% | 23.8% | 55.1% | 92.4% | 74.0% | 98.0% | 88.9% | 85.8% | 91.7% |
| 34.2 | 82.7% | 56.3% | 95.0% | 38.2% | 26.3% | 53.5% | 37.3% | 32.3% | 42.6% | 83.0% | 63.5% | 92.8% | 38.2% | 23.8% | 55.1% | 92.3% | 74.0% | 98.0% | 88.9% | 85.8% | 91.7% |
| 34.3 | 82.7% | 56.2% | 95.0% | 38.1% | 26.2% | 53.4% | 37.3% | 32.2% | 42.6% | 83.0% | 63.3% | 92.7% | 38.2% | 23.7% | 55.0% | 92.3% | 73.9% | 98.0% | 88.9% | 85.8% | 91.7% |
| 34.4 | 82.6% | 56.1% | 95.0% | 38.0% | 26.1% | 53.3% | 37.2% | 32.1% | 42.6% | 82.9% | 63.2% | 92.7% | 38.1% | 23.7% | 54.9% | 92.3% | 73.9% | 98.0% | 88.9% | 85.8% | 91.7% |
| 34.5 | 82.6% | 56.0% | 95.0% | 38.0% | 26.1% | 53.2% | 37.2% | 32.0% | 42.6% | 82.8% | 63.1% | 92.7% | 38.1% | 23.7% | 54.9% | 92.3% | 73.8% | 98.0% | 88.9% | 85.8% | 91.7% |

|      |       |       |       |       |       |       |       |       |       |       |       |       |       |       |       |       |       |       |       |       |       |
|------|-------|-------|-------|-------|-------|-------|-------|-------|-------|-------|-------|-------|-------|-------|-------|-------|-------|-------|-------|-------|-------|
| 34.6 | 82.5% | 55.9% | 94.9% | 37.9% | 26.0% | 53.2% | 37.2% | 31.9% | 42.6% | 82.7% | 62.9% | 92.6% | 38.0% | 23.6% | 54.8% | 92.2% | 73.8% | 98.0% | 88.9% | 85.8% | 91.7% |
| 34.7 | 82.5% | 55.8% | 94.9% | 37.8% | 26.0% | 53.1% | 37.2% | 31.8% | 42.6% | 82.7% | 62.8% | 92.6% | 38.0% | 23.6% | 54.8% | 92.2% | 73.7% | 98.0% | 88.9% | 85.8% | 91.6% |
| 34.8 | 82.4% | 55.8% | 94.9% | 37.8% | 25.9% | 53.0% | 37.1% | 31.6% | 42.6% | 82.6% | 62.6% | 92.6% | 37.9% | 23.6% | 54.7% | 92.2% | 73.7% | 98.0% | 88.9% | 85.8% | 91.6% |
| 34.9 | 82.3% | 55.6% | 94.9% | 37.7% | 25.9% | 52.9% | 37.1% | 31.5% | 42.6% | 82.5% | 62.5% | 92.5% | 37.9% | 23.5% | 54.7% | 92.2% | 73.6% | 98.0% | 88.9% | 85.8% | 91.6% |
| 35   | 82.3% | 55.5% | 94.9% | 37.6% | 25.8% | 52.8% | 37.1% | 31.3% | 42.5% | 82.4% | 62.3% | 92.5% | 37.9% | 23.5% | 54.6% | 92.1% | 73.6% | 98.0% | 88.9% | 85.8% | 91.6% |
| 35.1 | 82.2% | 55.4% | 94.9% | 37.6% | 25.8% | 52.8% | 37.1% | 31.1% | 42.5% | 82.4% | 62.2% | 92.4% | 37.8% | 23.5% | 54.6% | 92.1% | 73.5% | 97.9% | 88.9% | 85.8% | 91.6% |
| 35.2 | 82.2% | 55.3% | 94.8% | 37.5% | 25.7% | 52.7% | 37.0% | 30.9% | 42.5% | 82.3% | 62.0% | 92.4% | 37.8% | 23.5% | 54.6% | 92.1% | 73.5% | 97.9% | 88.9% | 85.8% | 91.5% |
| 35.3 | 82.1% | 55.2% | 94.8% | 37.5% | 25.7% | 52.6% | 37.0% | 30.7% | 42.5% | 82.2% | 61.9% | 92.4% | 37.8% | 23.4% | 54.5% | 92.0% | 73.5% | 97.9% | 88.9% | 85.8% | 91.5% |
| 35.4 | 82.0% | 55.1% | 94.8% | 37.4% | 25.6% | 52.6% | 37.0% | 30.6% | 42.5% | 82.1% | 61.7% | 92.3% | 37.7% | 23.4% | 54.5% | 92.0% | 73.4% | 97.9% | 88.9% | 85.8% | 91.5% |
| 35.5 | 82.0% | 55.0% | 94.8% | 37.3% | 25.6% | 52.5% | 37.0% | 30.4% | 42.5% | 82.0% | 61.6% | 92.3% | 37.7% | 23.3% | 54.5% | 92.0% | 73.4% | 97.9% | 88.9% | 85.8% | 91.5% |
| 35.6 | 81.9% | 54.9% | 94.8% | 37.3% | 25.5% | 52.4% | 37.0% | 30.2% | 42.5% | 82.0% | 61.4% | 92.2% | 37.7% | 23.3% | 54.4% | 92.0% | 73.4% | 97.9% | 88.9% | 85.8% | 91.4% |
| 35.7 | 81.8% | 54.8% | 94.7% | 37.2% | 25.5% | 52.4% | 37.0% | 30.0% | 42.4% | 81.9% | 61.3% | 92.2% | 37.7% | 23.3% | 54.4% | 91.9% | 73.3% | 97.9% | 88.9% | 85.8% | 91.4% |
| 35.8 | 81.8% | 54.7% | 94.7% | 37.2% | 25.5% | 52.3% | 37.0% | 29.9% | 42.5% | 81.8% | 61.1% | 92.1% | 37.7% | 23.2% | 54.4% | 91.9% | 73.3% | 97.9% | 88.9% | 85.7% | 91.4% |
| 35.9 | 81.7% | 54.6% | 94.7% | 37.1% | 25.4% | 52.3% | 37.0% | 29.7% | 42.5% | 81.7% | 61.0% | 92.1% | 37.6% | 23.2% | 54.4% | 91.9% | 73.3% | 97.9% | 88.9% | 85.7% | 91.4% |
| 36   | 81.6% | 54.4% | 94.7% | 37.1% | 25.4% | 52.2% | 37.0% | 29.5% | 42.5% | 81.6% | 60.8% | 92.1% | 37.6% | 23.2% | 54.3% | 91.8% | 73.2% | 97.9% | 88.9% | 85.7% | 91.3% |
| 36.1 | 81.6% | 54.3% | 94.6% | 37.0% | 25.3% | 52.2% | 37.0% | 29.2% | 42.5% | 81.5% | 60.6% | 92.0% | 37.6% | 23.2% | 54.3% | 91.8% | 73.2% | 97.9% | 88.9% | 85.7% | 91.3% |
| 36.2 | 81.5% | 54.2% | 94.6% | 37.0% | 25.3% | 52.1% | 37.0% | 29.0% | 42.5% | 81.5% | 60.5% | 92.0% | 37.6% | 23.2% | 54.3% | 91.8% | 73.1% | 97.9% | 88.9% | 85.6% | 91.3% |
| 36.3 | 81.4% | 54.1% | 94.6% | 36.9% | 25.2% | 52.1% | 37.0% | 28.8% | 42.5% | 81.4% | 60.3% | 91.9% | 37.6% | 23.2% | 54.3% | 91.7% | 73.1% | 97.9% | 88.9% | 85.6% | 91.3% |
| 36.4 | 81.4% | 54.0% | 94.6% | 36.9% | 25.2% | 52.1% | 37.0% | 28.6% | 42.5% | 81.3% | 60.2% | 91.9% | 37.6% | 23.2% | 54.3% | 91.7% | 73.0% | 97.8% | 88.9% | 85.6% | 91.3% |
| 36.5 | 81.3% | 53.9% | 94.5% | 36.8% | 25.2% | 52.0% | 37.0% | 28.5% | 42.4% | 81.2% | 60.1% | 91.8% | 37.6% | 23.2% | 54.2% | 91.6% | 73.0% | 97.8% | 88.9% | 85.6% | 91.2% |
| 36.6 | 81.2% | 53.8% | 94.5% | 36.8% | 25.1% | 52.0% | 37.0% | 28.3% | 42.4% | 81.1% | 60.0% | 91.8% | 37.6% | 23.2% | 54.2% | 91.6% | 72.9% | 97.8% | 88.9% | 85.6% | 91.2% |
| 36.7 | 81.2% | 53.7% | 94.5% | 36.7% | 25.1% | 51.9% | 37.0% | 28.1% | 42.4% | 81.0% | 59.9% | 91.8% | 37.6% | 23.3% | 54.2% | 91.6% | 72.9% | 97.8% | 88.9% | 85.6% | 91.2% |
| 36.8 | 81.1% | 53.6% | 94.5% | 36.7% | 25.0% | 51.9% | 37.0% | 27.9% | 42.4% | 81.0% | 59.8% | 91.7% | 37.6% | 23.3% | 54.1% | 91.5% | 72.8% | 97.8% | 88.9% | 85.6% | 91.2% |
| 36.9 | 81.0% | 53.5% | 94.5% | 36.7% | 25.0% | 51.8% | 37.0% | 27.7% | 42.4% | 80.9% | 59.6% | 91.7% | 37.6% | 23.3% | 54.1% | 91.5% | 72.7% | 97.8% | 88.9% | 85.6% | 91.2% |
| 37   | 80.9% | 53.4% | 94.4% | 36.6% | 25.0% | 51.8% | 37.0% | 27.5% | 42.4% | 80.8% | 59.5% | 91.6% | 37.6% | 23.3% | 54.1% | 91.5% | 72.7% | 97.7% | 88.9% | 85.6% | 91.1% |
| 37.1 | 80.9% | 53.3% | 94.4% | 36.6% | 24.9% | 51.8% | 37.0% | 27.3% | 42.4% | 80.7% | 59.4% | 91.6% | 37.6% | 23.3% | 54.1% | 91.4% | 72.6% | 97.7% | 88.9% | 85.6% | 91.1% |
| 37.2 | 80.8% | 53.1% | 94.4% | 36.6% | 24.9% | 51.7% | 37.0% | 27.2% | 42.4% | 80.6% | 59.3% | 91.5% | 37.7% | 23.2% | 54.1% | 91.4% | 72.6% | 97.7% | 88.9% | 85.6% | 91.1% |
| 37.3 | 80.7% | 53.0% | 94.4% | 36.5% | 24.9% | 51.7% | 37.0% | 27.0% | 42.4% | 80.5% | 59.2% | 91.5% | 37.7% | 23.2% | 54.1% | 91.3% | 72.6% | 97.7% | 88.9% | 85.5% | 91.1% |
| 37.4 | 80.7% | 52.9% | 94.3% | 36.5% | 24.8% | 51.7% | 37.0% | 26.8% | 42.4% | 80.5% | 59.1% | 91.5% | 37.7% | 23.2% | 54.1% | 91.3% | 72.5% | 97.7% | 88.9% | 85.5% | 91.1% |
| 37.5 | 80.6% | 52.8% | 94.3% | 36.5% | 24.8% | 51.7% | 37.0% | 26.7% | 42.4% | 80.4% | 59.0% | 91.5% | 37.7% | 23.2% | 54.1% | 91.3% | 72.5% | 97.7% | 88.9% | 85.5% | 91.1% |
| 37.6 | 80.5% | 52.7% | 94.3% | 36.4% | 24.8% | 51.6% | 37.0% | 26.5% | 42.4% | 80.3% | 58.9% | 91.4% | 37.7% | 23.2% | 54.1% | 91.2% | 72.4% | 97.7% | 88.9% | 85.5% | 91.1% |
| 37.7 | 80.4% | 52.6% | 94.3% | 36.4% | 24.8% | 51.6% | 37.0% | 26.4% | 42.4% | 80.2% | 58.8% | 91.4% | 37.7% | 23.2% | 54.2% | 91.2% | 72.4% | 97.7% | 88.9% | 85.5% | 91.1% |

|      |       |       |       |       |       |       |       |       |       |       |       |       |       |       |       |       |       |       |       |       |       |
|------|-------|-------|-------|-------|-------|-------|-------|-------|-------|-------|-------|-------|-------|-------|-------|-------|-------|-------|-------|-------|-------|
| 37.8 | 80.4% | 52.5% | 94.2% | 36.4% | 24.7% | 51.6% | 37.0% | 26.2% | 42.4% | 80.1% | 58.7% | 91.3% | 37.7% | 23.2% | 54.2% | 91.1% | 72.3% | 97.7% | 88.9% | 85.5% | 91.0% |
| 37.9 | 80.3% | 52.3% | 94.2% | 36.4% | 24.7% | 51.5% | 37.0% | 26.1% | 42.3% | 80.0% | 58.5% | 91.3% | 37.7% | 23.2% | 54.2% | 91.1% | 72.2% | 97.7% | 88.9% | 85.5% | 91.0% |
| 38   | 80.2% | 52.2% | 94.2% | 36.3% | 24.7% | 51.5% | 37.0% | 25.9% | 42.3% | 80.0% | 58.4% | 91.3% | 37.7% | 23.2% | 54.2% | 91.0% | 72.2% | 97.7% | 88.9% | 85.4% | 91.0% |
| 38.1 | 80.1% | 52.1% | 94.2% | 36.3% | 24.7% | 51.5% | 37.0% | 25.8% | 42.3% | 79.9% | 58.3% | 91.2% | 37.7% | 23.2% | 54.2% | 91.0% | 72.2% | 97.7% | 88.9% | 85.4% | 91.0% |
| 38.2 | 80.1% | 52.0% | 94.1% | 36.3% | 24.6% | 51.5% | 37.0% | 25.6% | 42.3% | 79.8% | 58.2% | 91.2% | 37.8% | 23.2% | 54.2% | 90.9% | 72.1% | 97.7% | 88.9% | 85.4% | 91.0% |
| 38.3 | 80.0% | 51.9% | 94.1% | 36.3% | 24.6% | 51.5% | 37.0% | 25.4% | 42.3% | 79.7% | 58.0% | 91.1% | 37.8% | 23.1% | 54.2% | 90.9% | 72.0% | 97.7% | 88.9% | 85.4% | 91.0% |
| 38.4 | 79.9% | 51.8% | 94.1% | 36.3% | 24.6% | 51.4% | 37.0% | 25.3% | 42.3% | 79.6% | 57.8% | 91.1% | 37.8% | 23.1% | 54.2% | 90.9% | 72.0% | 97.6% | 88.9% | 85.3% | 91.0% |
| 38.5 | 79.8% | 51.6% | 94.0% | 36.2% | 24.6% | 51.4% | 37.0% | 25.2% | 42.3% | 79.6% | 57.7% | 91.0% | 37.8% | 23.1% | 54.2% | 90.8% | 71.9% | 97.6% | 88.9% | 85.3% | 91.0% |
| 38.6 | 79.7% | 51.5% | 94.0% | 36.2% | 24.6% | 51.4% | 37.0% | 25.1% | 42.3% | 79.5% | 57.6% | 90.9% | 37.8% | 23.1% | 54.2% | 90.8% | 71.9% | 97.6% | 88.9% | 85.3% | 91.0% |
| 38.7 | 79.7% | 51.4% | 94.0% | 36.2% | 24.5% | 51.4% | 37.0% | 24.9% | 42.3% | 79.4% | 57.5% | 90.9% | 37.8% | 23.1% | 54.2% | 90.7% | 71.8% | 97.6% | 88.9% | 85.3% | 91.0% |
| 38.8 | 79.6% | 51.3% | 94.0% | 36.2% | 24.5% | 51.4% | 37.0% | 24.8% | 42.2% | 79.3% | 57.4% | 90.8% | 37.8% | 23.1% | 54.2% | 90.7% | 71.7% | 97.6% | 88.9% | 85.3% | 91.0% |
| 38.9 | 79.5% | 51.1% | 93.9% | 36.2% | 24.5% | 51.4% | 37.0% | 24.7% | 42.2% | 79.3% | 57.3% | 90.8% | 37.8% | 23.0% | 54.2% | 90.7% | 71.7% | 97.6% | 88.9% | 85.2% | 91.0% |
| 39   | 79.4% | 51.0% | 93.9% | 36.2% | 24.5% | 51.4% | 37.0% | 24.6% | 42.2% | 79.2% | 57.2% | 90.8% | 37.8% | 23.0% | 54.2% | 90.6% | 71.6% | 97.6% | 88.9% | 85.2% | 91.0% |
| 39.1 | 79.3% | 50.9% | 93.9% | 36.2% | 24.5% | 51.4% | 37.0% | 24.5% | 42.2% | 79.1% | 57.1% | 90.7% | 37.8% | 23.0% | 54.2% | 90.6% | 71.4% | 97.6% | 88.9% | 85.1% | 91.0% |
| 39.2 | 79.3% | 50.8% | 93.9% | 36.2% | 24.5% | 51.3% | 37.0% | 24.4% | 42.2% | 79.0% | 57.0% | 90.7% | 37.8% | 23.0% | 54.2% | 90.5% | 71.1% | 97.6% | 88.9% | 85.1% | 91.0% |
| 39.3 | 79.2% | 50.7% | 93.8% | 36.2% | 24.5% | 51.3% | 37.0% | 24.3% | 42.2% | 78.9% | 56.9% | 90.7% | 37.8% | 22.9% | 54.2% | 90.5% | 70.9% | 97.6% | 88.9% | 85.0% | 91.0% |
| 39.4 | 79.1% | 50.5% | 93.8% | 36.1% | 24.4% | 51.3% | 37.0% | 24.2% | 42.2% | 78.9% | 56.8% | 90.7% | 37.8% | 22.9% | 54.2% | 90.4% | 70.7% | 97.6% | 88.9% | 84.9% | 91.0% |
| 39.5 | 79.0% | 50.4% | 93.8% | 36.1% | 24.4% | 51.3% | 37.0% | 24.1% | 42.2% | 78.8% | 56.7% | 90.6% | 37.8% | 22.9% | 54.2% | 90.4% | 70.5% | 97.5% | 88.9% | 84.9% | 91.0% |
| 39.6 | 78.9% | 50.3% | 93.7% | 36.1% | 24.4% | 51.3% | 37.0% | 24.0% | 42.2% | 78.7% | 56.6% | 90.6% | 37.7% | 22.8% | 54.2% | 90.4% | 70.3% | 97.5% | 88.9% | 84.9% | 91.0% |
| 39.7 | 78.9% | 50.2% | 93.7% | 36.1% | 24.4% | 51.3% | 37.0% | 23.9% | 42.2% | 78.6% | 56.5% | 90.6% | 37.7% | 22.8% | 54.2% | 90.3% | 70.1% | 97.5% | 88.9% | 84.8% | 90.9% |
| 39.8 | 78.8% | 50.0% | 93.7% | 36.1% | 24.4% | 51.3% | 37.0% | 23.7% | 42.2% | 78.6% | 56.3% | 90.5% | 37.7% | 22.8% | 54.1% | 90.3% | 69.9% | 97.5% | 88.9% | 84.8% | 90.9% |
| 39.9 | 78.7% | 49.9% | 93.7% | 36.1% | 24.4% | 51.3% | 37.0% | 23.6% | 42.2% | 78.5% | 56.2% | 90.5% | 37.7% | 22.8% | 54.1% | 90.3% | 69.7% | 97.5% | 88.9% | 84.7% | 90.9% |
| 40   | 78.6% | 49.8% | 93.6% | 36.1% | 24.4% | 51.3% | 37.0% | 23.5% | 42.2% | 78.4% | 56.1% | 90.5% | 37.7% | 22.8% | 54.1% | 90.2% | 69.7% | 97.5% | 88.9% | 84.7% | 90.9% |
| 40.1 | 78.5% | 49.6% | 93.6% | 36.2% | 24.4% | 51.3% | 37.0% | 23.4% | 42.2% | 78.4% | 55.9% | 90.4% | 37.7% | 22.8% | 54.1% | 90.2% | 69.7% | 97.5% | 88.9% | 84.6% | 90.9% |
| 40.2 | 78.4% | 49.5% | 93.6% | 36.2% | 24.4% | 51.3% | 37.0% | 23.3% | 42.2% | 78.3% | 55.8% | 90.4% | 37.7% | 22.7% | 54.1% | 90.1% | 69.7% | 97.5% | 88.9% | 84.6% | 90.9% |
| 40.3 | 78.3% | 49.4% | 93.5% | 36.2% | 24.4% | 51.4% | 37.0% | 23.2% | 42.2% | 78.2% | 55.7% | 90.4% | 37.7% | 22.7% | 54.0% | 90.1% | 69.7% | 97.4% | 88.9% | 84.6% | 90.9% |
| 40.4 | 78.3% | 49.2% | 93.5% | 36.2% | 24.4% | 51.4% | 37.0% | 23.1% | 42.2% | 78.1% | 55.6% | 90.3% | 37.7% | 22.7% | 54.0% | 90.1% | 69.6% | 97.4% | 88.9% | 84.5% | 90.9% |
| 40.5 | 78.2% | 49.1% | 93.5% | 36.2% | 24.4% | 51.4% | 37.0% | 22.9% | 42.2% | 78.1% | 55.4% | 90.3% | 37.6% | 22.7% | 54.0% | 90.0% | 69.4% | 97.4% | 88.9% | 84.4% | 90.9% |
| 40.6 | 78.1% | 49.0% | 93.4% | 36.2% | 24.4% | 51.4% | 37.0% | 22.8% | 42.2% | 78.0% | 55.3% | 90.3% | 37.6% | 22.6% | 54.0% | 90.0% | 69.4% | 97.4% | 88.9% | 84.3% | 90.9% |
| 40.7 | 78.0% | 48.9% | 93.4% | 36.2% | 24.4% | 51.4% | 37.0% | 22.7% | 42.2% | 77.9% | 55.2% | 90.2% | 37.6% | 22.6% | 54.0% | 90.0% | 69.3% | 97.4% | 88.9% | 84.2% | 90.9% |
| 40.8 | 77.9% | 48.7% | 93.4% | 36.2% | 24.4% | 51.4% | 37.0% | 22.6% | 42.2% | 77.9% | 55.1% | 90.2% | 37.6% | 22.6% | 53.9% | 89.9% | 69.3% | 97.4% | 88.9% | 84.2% | 90.9% |
| 40.9 | 77.8% | 48.6% | 93.3% | 36.2% | 24.4% | 51.4% | 37.0% | 22.6% | 42.2% | 77.8% | 54.9% | 90.1% | 37.6% | 22.6% | 53.9% | 89.9% | 69.2% | 97.4% | 88.9% | 84.0% | 90.9% |

|      |       |       |       |       |       |       |       |       |       |       |       |       |       |       |       |       |       |       |       |       |       |
|------|-------|-------|-------|-------|-------|-------|-------|-------|-------|-------|-------|-------|-------|-------|-------|-------|-------|-------|-------|-------|-------|
| 41   | 77.7% | 48.5% | 93.3% | 36.2% | 24.4% | 51.4% | 37.0% | 22.5% | 42.2% | 77.7% | 54.8% | 90.1% | 37.6% | 22.5% | 53.9% | 89.9% | 69.2% | 97.4% | 88.9% | 84.0% | 90.9% |
| 41.1 | 77.6% | 48.3% | 93.3% | 36.2% | 24.4% | 51.3% | 37.0% | 22.4% | 42.2% | 77.6% | 54.7% | 90.1% | 37.5% | 22.5% | 53.9% | 89.8% | 69.1% | 97.4% | 88.9% | 83.9% | 90.9% |
| 41.2 | 77.5% | 48.2% | 93.2% | 36.2% | 24.4% | 51.3% | 37.0% | 22.4% | 42.2% | 77.6% | 54.6% | 90.0% | 37.5% | 22.5% | 53.8% | 89.8% | 69.1% | 97.4% | 88.9% | 83.8% | 90.9% |
| 41.3 | 77.4% | 48.0% | 93.2% | 36.2% | 24.4% | 51.3% | 37.0% | 22.3% | 42.2% | 77.5% | 54.5% | 90.0% | 37.5% | 22.4% | 53.8% | 89.8% | 69.0% | 97.4% | 88.9% | 83.7% | 90.9% |
| 41.4 | 77.3% | 47.9% | 93.2% | 36.2% | 24.4% | 51.3% | 37.0% | 22.3% | 42.2% | 77.4% | 54.4% | 90.0% | 37.5% | 22.4% | 53.8% | 89.7% | 68.9% | 97.4% | 88.9% | 83.5% | 90.8% |
| 41.5 | 77.3% | 47.8% | 93.2% | 36.2% | 24.4% | 51.3% | 37.0% | 22.2% | 42.2% | 77.4% | 54.3% | 89.9% | 37.5% | 22.4% | 53.8% | 89.7% | 68.6% | 97.4% | 88.9% | 83.5% | 90.8% |
| 41.6 | 77.2% | 47.6% | 93.1% | 36.3% | 24.4% | 51.3% | 37.0% | 22.2% | 42.2% | 77.3% | 54.2% | 89.9% | 37.4% | 22.3% | 53.7% | 89.7% | 68.6% | 97.4% | 88.9% | 83.4% | 90.8% |
| 41.7 | 77.1% | 47.5% | 93.1% | 36.3% | 24.4% | 51.3% | 37.0% | 22.1% | 42.2% | 77.2% | 54.1% | 89.9% | 37.4% | 22.3% | 53.7% | 89.6% | 68.6% | 97.3% | 88.9% | 83.3% | 90.8% |
| 41.8 | 77.0% | 47.4% | 93.1% | 36.3% | 24.4% | 51.3% | 37.0% | 22.1% | 42.2% | 77.2% | 54.0% | 89.8% | 37.4% | 22.3% | 53.7% | 89.6% | 68.5% | 97.3% | 88.9% | 83.1% | 90.8% |
| 41.9 | 76.9% | 47.2% | 93.0% | 36.3% | 24.4% | 51.3% | 37.0% | 22.0% | 42.2% | 77.1% | 53.9% | 89.8% | 37.3% | 22.3% | 53.7% | 89.6% | 68.5% | 97.3% | 88.8% | 83.0% | 90.8% |
| 42   | 76.8% | 47.1% | 93.0% | 36.3% | 24.4% | 51.3% | 37.0% | 22.0% | 42.2% | 77.1% | 53.9% | 89.8% | 37.3% | 22.2% | 53.6% | 89.6% | 68.5% | 97.2% | 88.8% | 82.9% | 90.8% |
| 42.1 | 76.7% | 46.9% | 92.9% | 36.3% | 24.4% | 51.3% | 37.0% | 22.0% | 42.2% | 77.0% | 53.8% | 89.7% | 37.3% | 22.2% | 53.6% | 89.5% | 68.4% | 97.2% | 88.8% | 82.8% | 90.8% |
| 42.2 | 76.6% | 46.8% | 92.9% | 36.3% | 24.4% | 51.3% | 37.0% | 21.9% | 42.2% | 76.9% | 53.7% | 89.7% | 37.3% | 22.2% | 53.5% | 89.5% | 68.4% | 97.2% | 88.8% | 82.7% | 90.8% |
| 42.3 | 76.5% | 46.7% | 92.9% | 36.3% | 24.4% | 51.3% | 37.0% | 21.9% | 42.2% | 76.9% | 53.6% | 89.7% | 37.2% | 22.1% | 53.5% | 89.5% | 68.3% | 97.2% | 88.8% | 82.6% | 90.8% |
| 42.4 | 76.4% | 46.5% | 92.8% | 36.3% | 24.4% | 51.3% | 37.0% | 21.9% | 42.2% | 76.8% | 53.5% | 89.6% | 37.2% | 22.1% | 53.4% | 89.4% | 68.3% | 97.2% | 88.8% | 82.5% | 90.8% |
| 42.5 | 76.3% | 46.4% | 92.8% | 36.3% | 24.4% | 51.3% | 37.0% | 21.9% | 42.2% | 76.7% | 53.4% | 89.6% | 37.2% | 22.1% | 53.4% | 89.4% | 68.2% | 97.2% | 88.8% | 82.4% | 90.7% |
| 42.6 | 76.2% | 46.2% | 92.8% | 36.3% | 24.4% | 51.3% | 37.0% | 21.9% | 42.2% | 76.7% | 53.3% | 89.6% | 37.1% | 22.0% | 53.3% | 89.4% | 68.1% | 97.2% | 88.8% | 82.3% | 90.7% |
| 42.7 | 76.1% | 46.1% | 92.7% | 36.3% | 24.4% | 51.3% | 37.0% | 21.8% | 42.2% | 76.6% | 53.3% | 89.5% | 37.1% | 22.0% | 53.3% | 89.4% | 68.0% | 97.2% | 88.7% | 82.2% | 90.7% |
| 42.8 | 76.0% | 45.9% | 92.7% | 36.3% | 24.4% | 51.3% | 37.0% | 21.8% | 42.2% | 76.6% | 53.2% | 89.5% | 37.1% | 22.0% | 53.2% | 89.3% | 67.9% | 97.2% | 88.7% | 82.1% | 90.7% |
| 42.9 | 75.9% | 45.8% | 92.7% | 36.3% | 24.4% | 51.3% | 37.0% | 21.8% | 42.2% | 76.5% | 53.1% | 89.5% | 37.0% | 21.9% | 53.2% | 89.3% | 67.7% | 97.2% | 88.7% | 82.1% | 90.7% |
| 43   | 75.8% | 45.7% | 92.6% | 36.3% | 24.4% | 51.3% | 37.0% | 21.8% | 42.2% | 76.4% | 53.0% | 89.4% | 37.0% | 21.9% | 53.1% | 89.3% | 67.6% | 97.1% | 88.7% | 82.0% | 90.6% |
| 43.1 | 75.7% | 45.5% | 92.6% | 36.3% | 24.4% | 51.3% | 37.0% | 21.8% | 42.2% | 76.4% | 52.9% | 89.4% | 36.9% | 21.9% | 53.1% | 89.3% | 67.5% | 97.1% | 88.7% | 81.9% | 90.6% |
| 43.2 | 75.6% | 45.4% | 92.6% | 36.3% | 24.4% | 51.3% | 37.0% | 21.8% | 42.2% | 76.3% | 52.8% | 89.4% | 36.9% | 21.8% | 53.0% | 89.2% | 67.2% | 97.1% | 88.7% | 81.8% | 90.6% |
| 43.3 | 75.5% | 45.2% | 92.5% | 36.3% | 24.4% | 51.3% | 37.0% | 21.8% | 42.2% | 76.3% | 52.7% | 89.3% | 36.9% | 21.8% | 53.0% | 89.2% | 66.9% | 97.1% | 88.6% | 81.7% | 90.6% |
| 43.4 | 75.4% | 45.1% | 92.5% | 36.3% | 24.4% | 51.3% | 37.0% | 21.8% | 42.2% | 76.2% | 52.6% | 89.3% | 36.8% | 21.7% | 52.9% | 89.2% | 66.7% | 97.1% | 88.6% | 81.6% | 90.6% |
| 43.5 | 75.3% | 44.9% | 92.4% | 36.3% | 24.4% | 51.3% | 37.0% | 21.8% | 42.2% | 76.1% | 52.5% | 89.3% | 36.8% | 21.7% | 52.9% | 89.2% | 66.6% | 97.1% | 88.6% | 81.5% | 90.5% |
| 43.6 | 75.2% | 44.8% | 92.4% | 36.3% | 24.4% | 51.3% | 37.0% | 21.8% | 42.2% | 76.1% | 52.4% | 89.3% | 36.7% | 21.7% | 52.8% | 89.1% | 66.6% | 97.1% | 88.6% | 81.4% | 90.5% |
| 43.7 | 75.1% | 44.6% | 92.4% | 36.3% | 24.4% | 51.3% | 37.0% | 21.8% | 42.2% | 76.0% | 52.3% | 89.2% | 36.7% | 21.7% | 52.8% | 89.1% | 66.5% | 97.1% | 88.6% | 81.4% | 90.5% |
| 43.8 | 75.0% | 44.5% | 92.3% | 36.3% | 24.4% | 51.3% | 37.0% | 21.8% | 42.2% | 76.0% | 52.3% | 89.2% | 36.6% | 21.6% | 52.7% | 89.1% | 66.5% | 97.1% | 88.5% | 81.3% | 90.4% |
| 43.9 | 74.8% | 44.3% | 92.3% | 36.3% | 24.4% | 51.3% | 37.0% | 21.8% | 42.2% | 75.9% | 52.2% | 89.2% | 36.6% | 21.6% | 52.7% | 89.1% | 66.2% | 97.1% | 88.5% | 81.2% | 90.4% |
| 44   | 74.7% | 44.2% | 92.2% | 36.3% | 24.4% | 51.3% | 37.0% | 21.8% | 42.2% | 75.9% | 52.2% | 89.1% | 36.6% | 21.5% | 52.6% | 89.1% | 66.0% | 97.1% | 88.5% | 81.1% | 90.4% |
| 44.1 | 74.6% | 44.1% | 92.2% | 36.3% | 24.4% | 51.3% | 37.0% | 21.8% | 42.2% | 75.8% | 52.1% | 89.1% | 36.5% | 21.5% | 52.5% | 89.0% | 66.0% | 97.1% | 88.5% | 81.0% | 90.4% |



|      |       |       |       |       |       |       |       |       |       |       |       |       |       |       |       |       |       |       |       |       |       |
|------|-------|-------|-------|-------|-------|-------|-------|-------|-------|-------|-------|-------|-------|-------|-------|-------|-------|-------|-------|-------|-------|
| 44.2 | 74.5% | 44.0% | 92.2% | 36.3% | 24.4% | 51.2% | 37.0% | 21.8% | 42.2% | 75.8% | 52.1% | 89.1% | 36.5% | 21.5% | 52.5% | 89.0% | 65.9% | 97.1% | 88.4% | 81.0% | 90.3% |
| 44.3 | 74.4% | 43.8% | 92.1% | 36.3% | 24.4% | 51.2% | 37.0% | 21.8% | 42.2% | 75.7% | 52.0% | 89.1% | 36.4% | 21.4% | 52.4% | 89.0% | 65.9% | 97.1% | 88.4% | 80.9% | 90.3% |
| 44.4 | 74.3% | 43.7% | 92.1% | 36.3% | 24.4% | 51.2% | 37.0% | 21.8% | 42.2% | 75.7% | 51.9% | 89.0% | 36.4% | 21.4% | 52.4% | 89.0% | 65.8% | 97.1% | 88.4% | 80.8% | 90.3% |
| 44.5 | 74.2% | 43.5% | 92.0% | 36.3% | 24.4% | 51.2% | 37.0% | 21.7% | 42.2% | 75.6% | 51.8% | 89.0% | 36.3% | 21.4% | 52.3% | 89.0% | 65.8% | 97.1% | 88.4% | 80.7% | 90.2% |
| 44.6 | 74.1% | 43.4% | 92.0% | 36.3% | 24.4% | 51.2% | 37.0% | 21.7% | 42.2% | 75.6% | 51.8% | 89.0% | 36.3% | 21.3% | 52.2% | 89.0% | 65.7% | 97.1% | 88.3% | 80.6% | 90.2% |
| 44.7 | 74.0% | 43.2% | 91.9% | 36.3% | 24.4% | 51.2% | 37.0% | 21.7% | 42.1% | 75.5% | 51.7% | 89.0% | 36.2% | 21.3% | 52.2% | 88.9% | 65.7% | 97.1% | 88.3% | 80.5% | 90.2% |
| 44.8 | 73.9% | 43.1% | 91.9% | 36.3% | 24.4% | 51.2% | 37.0% | 21.6% | 42.1% | 75.5% | 51.6% | 88.9% | 36.2% | 21.2% | 52.1% | 88.9% | 65.5% | 97.1% | 88.3% | 80.5% | 90.2% |
| 44.9 | 73.7% | 42.9% | 91.8% | 36.3% | 24.4% | 51.2% | 37.0% | 21.6% | 42.1% | 75.4% | 51.6% | 88.9% | 36.1% | 21.2% | 52.1% | 88.9% | 65.1% | 97.1% | 88.3% | 80.4% | 90.1% |
| 45   | 73.6% | 42.8% | 91.8% | 36.3% | 24.4% | 51.2% | 37.0% | 21.6% | 42.1% | 75.4% | 51.5% | 88.9% | 36.0% | 21.2% | 52.0% | 88.9% | 65.1% | 97.1% | 88.2% | 80.3% | 90.1% |
| 45.1 | 73.5% | 42.6% | 91.7% | 36.3% | 24.4% | 51.2% | 37.0% | 21.6% | 42.1% | 75.3% | 51.4% | 88.9% | 36.0% | 21.1% | 51.9% | 88.9% | 65.1% | 97.1% | 88.2% | 80.2% | 90.1% |
| 45.2 | 73.4% | 42.5% | 91.7% | 36.3% | 24.4% | 51.1% | 37.0% | 21.6% | 42.1% | 75.3% | 51.4% | 88.8% | 35.9% | 21.1% | 51.9% | 88.9% | 64.6% | 97.1% | 88.2% | 80.1% | 90.0% |
| 45.3 | 73.3% | 42.3% | 91.6% | 36.3% | 24.4% | 51.1% | 37.0% | 21.6% | 42.1% | 75.2% | 51.3% | 88.8% | 35.9% | 21.0% | 51.8% | 88.9% | 64.0% | 97.1% | 88.1% | 80.0% | 90.0% |
| 45.4 | 73.2% | 42.2% | 91.6% | 36.3% | 24.4% | 51.1% | 37.0% | 21.6% | 42.1% | 75.2% | 51.2% | 88.8% | 35.8% | 21.0% | 51.8% | 88.8% | 63.5% | 97.0% | 88.1% | 80.0% | 90.0% |
| 45.5 | 73.0% | 42.0% | 91.5% | 36.3% | 24.4% | 51.1% | 37.0% | 21.6% | 42.1% | 75.1% | 51.2% | 88.8% | 35.8% | 21.0% | 51.7% | 88.8% | 62.9% | 97.0% | 88.1% | 79.9% | 89.9% |
| 45.6 | 72.9% | 41.9% | 91.5% | 36.3% | 24.4% | 51.1% | 37.0% | 21.6% | 42.1% | 75.1% | 51.1% | 88.7% | 35.7% | 20.9% | 51.6% | 88.8% | 62.3% | 97.0% | 88.0% | 79.8% | 89.9% |
| 45.7 | 72.8% | 41.7% | 91.4% | 36.3% | 24.3% | 51.1% | 37.0% | 21.5% | 42.1% | 75.1% | 51.1% | 88.7% | 35.6% | 20.9% | 51.6% | 88.8% | 61.6% | 97.0% | 88.0% | 79.7% | 89.9% |
| 45.8 | 72.7% | 41.6% | 91.3% | 36.3% | 24.3% | 51.1% | 37.0% | 21.4% | 42.1% | 75.0% | 51.0% | 88.6% | 35.6% | 20.8% | 51.5% | 88.8% | 61.5% | 97.0% | 88.0% | 79.7% | 89.8% |
| 45.9 | 72.6% | 41.5% | 91.3% | 36.3% | 24.3% | 51.0% | 37.0% | 21.3% | 42.1% | 75.0% | 51.0% | 88.6% | 35.5% | 20.8% | 51.4% | 88.8% | 61.5% | 97.0% | 87.9% | 79.6% | 89.8% |
| 46   | 72.5% | 41.3% | 91.2% | 36.3% | 24.3% | 51.0% | 37.0% | 21.2% | 42.1% | 74.9% | 50.9% | 88.6% | 35.4% | 20.8% | 51.4% | 88.8% | 61.4% | 97.0% | 87.9% | 79.6% | 89.8% |
| 46.1 | 72.3% | 41.2% | 91.2% | 36.3% | 24.3% | 51.0% | 37.0% | 21.2% | 42.1% | 74.9% | 50.9% | 88.6% | 35.4% | 20.7% | 51.3% | 88.8% | 61.3% | 97.0% | 87.9% | 79.5% | 89.7% |
| 46.2 | 72.2% | 41.1% | 91.1% | 36.3% | 24.3% | 51.0% | 37.0% | 21.2% | 42.1% | 74.8% | 50.8% | 88.6% | 35.3% | 20.7% | 51.2% | 88.8% | 61.1% | 97.0% | 87.8% | 79.4% | 89.7% |
| 46.3 | 72.1% | 41.0% | 91.1% | 36.2% | 24.3% | 51.0% | 37.0% | 21.2% | 42.1% | 74.8% | 50.8% | 88.6% | 35.2% | 20.6% | 51.2% | 88.8% | 61.1% | 97.0% | 87.8% | 79.4% | 89.6% |
| 46.4 | 72.0% | 40.9% | 91.0% | 36.2% | 24.3% | 51.0% | 37.0% | 21.2% | 42.0% | 74.8% | 50.7% | 88.5% | 35.2% | 20.5% | 51.1% | 88.7% | 61.0% | 97.0% | 87.8% | 79.3% | 89.6% |
| 46.5 | 71.8% | 40.7% | 91.0% | 36.2% | 24.3% | 50.9% | 37.0% | 21.1% | 42.0% | 74.7% | 50.7% | 88.5% | 35.1% | 20.4% | 51.0% | 88.7% | 60.9% | 97.0% | 87.7% | 79.3% | 89.6% |
| 46.6 | 71.7% | 40.6% | 90.9% | 36.2% | 24.3% | 50.9% | 37.0% | 21.0% | 42.0% | 74.7% | 50.6% | 88.5% | 35.0% | 20.4% | 51.0% | 88.7% | 60.7% | 97.0% | 87.7% | 79.2% | 89.6% |
| 46.7 | 71.6% | 40.5% | 90.8% | 36.2% | 24.3% | 50.9% | 37.0% | 20.9% | 42.0% | 74.7% | 50.6% | 88.5% | 35.0% | 20.4% | 50.9% | 88.7% | 60.5% | 97.0% | 87.6% | 79.2% | 89.6% |
| 46.8 | 71.5% | 40.4% | 90.8% | 36.2% | 24.3% | 50.9% | 37.0% | 20.9% | 42.0% | 74.6% | 50.5% | 88.5% | 34.9% | 20.3% | 50.8% | 88.7% | 59.8% | 97.0% | 87.6% | 79.1% | 89.5% |
| 46.9 | 71.4% | 40.3% | 90.7% | 36.2% | 24.3% | 50.9% | 37.0% | 20.9% | 42.0% | 74.6% | 50.5% | 88.5% | 34.8% | 20.3% | 50.8% | 88.7% | 59.5% | 97.0% | 87.6% | 79.1% | 89.5% |
| 47   | 71.2% | 40.2% | 90.7% | 36.2% | 24.2% | 50.9% | 37.0% | 20.9% | 42.0% | 74.5% | 50.4% | 88.4% | 34.8% | 20.3% | 50.7% | 88.7% | 59.4% | 96.9% | 87.5% | 79.1% | 89.4% |
| 47.1 | 71.1% | 40.0% | 90.6% | 36.2% | 24.2% | 50.9% | 37.0% | 20.9% | 42.0% | 74.5% | 50.4% | 88.4% | 34.7% | 20.2% | 50.6% | 88.7% | 58.8% | 96.9% | 87.5% | 79.0% | 89.4% |
| 47.2 | 71.0% | 39.9% | 90.6% | 36.2% | 24.2% | 50.9% | 37.0% | 20.9% | 42.0% | 74.5% | 50.4% | 88.4% | 34.6% | 20.2% | 50.5% | 88.7% | 58.3% | 96.9% | 87.4% | 79.0% | 89.3% |
| 47.3 | 70.9% | 39.8% | 90.5% | 36.2% | 24.2% | 50.9% | 37.0% | 20.9% | 42.0% | 74.4% | 50.3% | 88.4% | 34.5% | 20.1% | 50.5% | 88.7% | 58.1% | 96.9% | 87.4% | 79.0% | 89.3% |

|      |       |       |       |       |       |       |       |       |       |       |       |       |       |       |       |       |       |       |       |       |       |
|------|-------|-------|-------|-------|-------|-------|-------|-------|-------|-------|-------|-------|-------|-------|-------|-------|-------|-------|-------|-------|-------|
| 47.4 | 70.8% | 39.7% | 90.5% | 36.2% | 24.2% | 50.9% | 37.0% | 20.9% | 42.0% | 74.4% | 50.3% | 88.4% | 34.5% | 20.1% | 50.4% | 88.7% | 57.9% | 96.9% | 87.3% | 78.9% | 89.3% |
| 47.5 | 70.6% | 39.6% | 90.4% | 36.2% | 24.2% | 50.9% | 37.0% | 20.9% | 42.0% | 74.4% | 50.2% | 88.3% | 34.4% | 20.1% | 50.3% | 88.7% | 57.4% | 96.9% | 87.3% | 78.9% | 89.2% |
| 47.6 | 70.5% | 39.5% | 90.4% | 36.2% | 24.2% | 50.9% | 37.0% | 20.9% | 42.0% | 74.3% | 50.2% | 88.3% | 34.3% | 20.0% | 50.2% | 88.7% | 56.8% | 96.9% | 87.2% | 78.9% | 89.2% |
| 47.7 | 70.4% | 39.3% | 90.3% | 36.1% | 24.2% | 50.9% | 37.0% | 20.8% | 42.0% | 74.3% | 50.1% | 88.3% | 34.2% | 20.0% | 50.1% | 88.7% | 56.6% | 96.9% | 87.2% | 78.9% | 89.1% |
| 47.8 | 70.3% | 39.2% | 90.3% | 36.1% | 24.2% | 50.9% | 37.0% | 20.8% | 42.0% | 74.2% | 50.1% | 88.3% | 34.2% | 20.0% | 50.0% | 88.7% | 55.9% | 96.9% | 87.1% | 78.8% | 89.1% |
| 47.9 | 70.2% | 39.1% | 90.2% | 36.1% | 24.2% | 50.9% | 37.0% | 20.8% | 42.0% | 74.2% | 50.0% | 88.3% | 34.1% | 19.9% | 49.9% | 88.7% | 55.5% | 96.9% | 87.1% | 78.8% | 89.0% |
| 48   | 70.1% | 39.0% | 90.2% | 36.1% | 24.2% | 50.9% | 37.0% | 20.8% | 42.0% | 74.2% | 50.0% | 88.2% | 34.0% | 19.9% | 49.8% | 88.7% | 55.1% | 96.9% | 87.0% | 78.8% | 89.0% |
| 48.1 | 69.9% | 38.9% | 90.1% | 36.1% | 24.2% | 50.9% | 37.0% | 20.8% | 42.0% | 74.1% | 49.9% | 88.2% | 33.9% | 19.8% | 49.8% | 88.7% | 54.7% | 96.9% | 87.0% | 78.7% | 88.9% |
| 48.2 | 69.8% | 38.8% | 90.1% | 36.1% | 24.2% | 50.9% | 37.0% | 20.8% | 42.0% | 74.1% | 49.9% | 88.2% | 33.8% | 19.8% | 49.7% | 88.7% | 53.9% | 96.9% | 86.9% | 78.7% | 88.9% |
| 48.3 | 69.7% | 38.6% | 90.0% | 36.1% | 24.2% | 50.9% | 37.0% | 20.8% | 42.0% | 74.1% | 49.8% | 88.2% | 33.8% | 19.8% | 49.6% | 88.7% | 52.9% | 96.8% | 86.9% | 78.7% | 88.8% |
| 48.4 | 69.6% | 38.5% | 90.0% | 36.1% | 24.2% | 50.9% | 37.0% | 20.8% | 42.0% | 74.0% | 49.8% | 88.2% | 33.7% | 19.7% | 49.5% | 88.7% | 52.0% | 96.8% | 86.8% | 78.7% | 88.8% |
| 48.5 | 69.5% | 38.4% | 89.9% | 36.1% | 24.2% | 50.9% | 37.0% | 20.8% | 42.0% | 74.0% | 49.7% | 88.1% | 33.6% | 19.7% | 49.5% | 88.7% | 51.0% | 96.8% | 86.8% | 78.7% | 88.7% |
| 48.6 | 69.3% | 38.3% | 89.9% | 36.1% | 24.1% | 50.9% | 37.0% | 20.8% | 42.0% | 74.0% | 49.6% | 88.1% | 33.5% | 19.6% | 49.4% | 88.7% | 50.3% | 96.8% | 86.7% | 78.7% | 88.7% |
| 48.7 | 69.2% | 38.2% | 89.8% | 36.1% | 24.1% | 50.9% | 37.0% | 20.8% | 42.0% | 73.9% | 49.5% | 88.1% | 33.5% | 19.6% | 49.3% | 88.7% | 50.3% | 96.8% | 86.7% | 78.7% | 88.6% |
| 48.8 | 69.1% | 38.0% | 89.8% | 36.0% | 24.1% | 50.9% | 37.0% | 20.8% | 42.0% | 73.9% | 49.5% | 88.1% | 33.4% | 19.5% | 49.2% | 88.7% | 50.2% | 96.7% | 86.6% | 78.6% | 88.5% |
| 48.9 | 69.0% | 37.9% | 89.8% | 36.0% | 24.1% | 50.9% | 37.0% | 20.8% | 42.0% | 73.8% | 49.4% | 88.1% | 33.3% | 19.5% | 49.2% | 88.7% | 50.2% | 96.7% | 86.6% | 78.6% | 88.5% |
| 49   | 68.9% | 37.8% | 89.7% | 36.0% | 24.1% | 50.9% | 37.0% | 20.8% | 42.0% | 73.8% | 49.3% | 88.0% | 33.2% | 19.4% | 49.1% | 88.7% | 49.8% | 96.7% | 86.5% | 78.6% | 88.4% |
| 49.1 | 68.8% | 37.6% | 89.7% | 36.0% | 24.1% | 50.9% | 37.0% | 20.8% | 42.0% | 73.8% | 49.2% | 88.0% | 33.2% | 19.4% | 49.0% | 88.7% | 49.1% | 96.7% | 86.4% | 78.6% | 88.4% |
| 49.2 | 68.6% | 37.5% | 89.6% | 36.0% | 24.1% | 50.9% | 37.0% | 20.8% | 42.0% | 73.7% | 49.1% | 88.0% | 33.1% | 19.4% | 48.9% | 88.7% | 48.5% | 96.6% | 86.4% | 78.6% | 88.3% |
| 49.3 | 68.5% | 37.4% | 89.6% | 36.0% | 24.1% | 50.9% | 37.0% | 20.8% | 42.0% | 73.7% | 49.0% | 88.0% | 33.0% | 19.3% | 48.8% | 88.7% | 48.3% | 96.6% | 86.3% | 78.6% | 88.2% |
| 49.4 | 68.4% | 37.3% | 89.5% | 36.0% | 24.1% | 50.9% | 37.0% | 20.8% | 42.0% | 73.7% | 48.9% | 87.9% | 32.9% | 19.3% | 48.8% | 88.7% | 48.3% | 96.6% | 86.3% | 78.6% | 88.2% |
| 49.5 | 68.3% | 37.1% | 89.5% | 36.0% | 24.1% | 50.9% | 37.0% | 20.8% | 42.0% | 73.6% | 48.9% | 87.9% | 32.9% | 19.2% | 48.7% | 88.7% | 47.9% | 96.6% | 86.2% | 78.6% | 88.1% |
| 49.6 | 68.2% | 37.0% | 89.4% | 35.9% | 24.1% | 50.8% | 37.0% | 20.7% | 42.0% | 73.6% | 48.8% | 87.9% | 32.8% | 19.2% | 48.6% | 88.7% | 47.9% | 96.6% | 86.1% | 78.6% | 88.1% |
| 49.7 | 68.1% | 36.9% | 89.4% | 35.9% | 24.0% | 50.8% | 37.0% | 20.7% | 42.0% | 73.5% | 48.7% | 87.9% | 32.7% | 19.1% | 48.5% | 88.7% | 47.7% | 96.6% | 86.1% | 78.6% | 88.0% |
| 49.8 | 67.9% | 36.8% | 89.3% | 35.9% | 24.0% | 50.8% | 37.0% | 20.7% | 42.0% | 73.5% | 48.6% | 87.9% | 32.6% | 19.1% | 48.5% | 88.7% | 47.0% | 96.6% | 86.0% | 78.6% | 88.0% |
| 49.9 | 67.8% | 36.6% | 89.3% | 35.9% | 24.0% | 50.8% | 37.0% | 20.7% | 42.0% | 73.5% | 48.5% | 87.9% | 32.6% | 19.0% | 48.4% | 88.7% | 46.3% | 96.6% | 85.9% | 78.5% | 87.9% |
| 50   | 67.7% | 36.5% | 89.2% | 35.9% | 24.0% | 50.8% | 37.0% | 20.7% | 42.0% | 73.4% | 48.4% | 87.8% | 32.5% | 18.9% | 48.3% | 88.7% | 45.7% | 96.6% | 85.9% | 78.5% | 87.9% |
| 50.1 | 67.6% | 36.4% | 89.2% | 35.9% | 23.9% | 50.7% | 37.0% | 20.7% | 42.0% | 73.4% | 48.3% | 87.8% | 32.4% | 18.9% | 48.2% | 88.7% | 45.0% | 96.6% | 85.8% | 78.5% | 87.8% |
| 50.2 | 67.5% | 36.3% | 89.1% | 35.9% | 23.9% | 50.7% | 37.0% | 20.7% | 42.0% | 73.4% | 48.3% | 87.8% | 32.3% | 18.8% | 48.1% | 88.7% | 44.5% | 96.6% | 85.8% | 78.5% | 87.8% |
| 50.3 | 67.4% | 36.2% | 89.1% | 35.9% | 23.9% | 50.7% | 37.0% | 20.7% | 42.0% | 73.3% | 48.2% | 87.8% | 32.3% | 18.8% | 48.1% | 88.7% | 43.6% | 96.6% | 85.7% | 78.5% | 87.7% |
| 50.4 | 67.2% | 36.0% | 89.0% | 35.8% | 23.9% | 50.7% | 37.0% | 20.7% | 42.0% | 73.3% | 48.1% | 87.8% | 32.2% | 18.8% | 48.0% | 88.7% | 43.0% | 96.5% | 85.6% | 78.5% | 87.6% |
| 50.5 | 67.1% | 35.9% | 89.0% | 35.8% | 23.8% | 50.7% | 37.0% | 20.7% | 42.0% | 73.2% | 48.0% | 87.7% | 32.1% | 18.8% | 47.9% | 88.7% | 42.3% | 96.5% | 85.6% | 78.5% | 87.6% |

|      |       |       |       |       |       |       |       |       |       |       |       |       |       |       |       |       |       |       |       |       |       |
|------|-------|-------|-------|-------|-------|-------|-------|-------|-------|-------|-------|-------|-------|-------|-------|-------|-------|-------|-------|-------|-------|
| 50.6 | 67.0% | 35.8% | 88.9% | 35.8% | 23.8% | 50.6% | 37.0% | 20.7% | 42.0% | 73.2% | 47.9% | 87.7% | 32.0% | 18.7% | 47.8% | 88.7% | 41.6% | 96.5% | 85.5% | 78.4% | 87.6% |
| 50.7 | 66.9% | 35.7% | 88.9% | 35.8% | 23.8% | 50.6% | 37.0% | 20.7% | 42.0% | 73.2% | 47.9% | 87.6% | 32.0% | 18.7% | 47.8% | 88.7% | 41.0% | 96.5% | 85.5% | 78.4% | 87.5% |
| 50.8 | 66.8% | 35.5% | 88.8% | 35.8% | 23.8% | 50.6% | 37.0% | 20.7% | 42.0% | 73.1% | 47.8% | 87.6% | 31.9% | 18.6% | 47.7% | 88.7% | 40.5% | 96.5% | 85.4% | 78.4% | 87.5% |
| 50.9 | 66.7% | 35.4% | 88.8% | 35.8% | 23.7% | 50.6% | 37.0% | 20.7% | 41.9% | 73.1% | 47.7% | 87.6% | 31.8% | 18.6% | 47.6% | 88.7% | 40.2% | 96.5% | 85.3% | 78.4% | 87.4% |
| 51   | 66.6% | 35.3% | 88.7% | 35.7% | 23.7% | 50.6% | 37.0% | 20.7% | 41.9% | 73.1% | 47.7% | 87.5% | 31.7% | 18.5% | 47.5% | 88.7% | 39.8% | 96.5% | 85.3% | 78.4% | 87.3% |
| 51.1 | 66.5% | 35.2% | 88.7% | 35.7% | 23.7% | 50.5% | 37.0% | 20.7% | 41.9% | 73.0% | 47.6% | 87.5% | 31.7% | 18.5% | 47.4% | 88.7% | 39.5% | 96.5% | 85.2% | 78.4% | 87.3% |
| 51.2 | 66.3% | 35.1% | 88.6% | 35.7% | 23.7% | 50.5% | 37.0% | 20.7% | 41.9% | 73.0% | 47.5% | 87.5% | 31.6% | 18.4% | 47.4% | 88.7% | 39.0% | 96.5% | 85.1% | 78.4% | 87.2% |
| 51.3 | 66.2% | 35.0% | 88.6% | 35.7% | 23.6% | 50.5% | 37.0% | 20.7% | 41.9% | 72.9% | 47.5% | 87.4% | 31.5% | 18.4% | 47.3% | 88.7% | 38.6% | 96.5% | 85.1% | 78.4% | 87.2% |
| 51.4 | 66.1% | 34.9% | 88.5% | 35.7% | 23.6% | 50.5% | 37.0% | 20.7% | 41.9% | 72.9% | 47.4% | 87.4% | 31.4% | 18.3% | 47.2% | 88.7% | 37.9% | 96.5% | 85.0% | 78.4% | 87.1% |
| 51.5 | 66.0% | 34.7% | 88.5% | 35.7% | 23.6% | 50.4% | 37.0% | 20.7% | 41.9% | 72.9% | 47.4% | 87.3% | 31.4% | 18.3% | 47.1% | 88.7% | 37.3% | 96.5% | 84.9% | 78.4% | 87.1% |
| 51.6 | 65.9% | 34.6% | 88.4% | 35.6% | 23.5% | 50.4% | 37.0% | 20.7% | 41.9% | 72.8% | 47.3% | 87.3% | 31.3% | 18.2% | 47.1% | 88.7% | 36.7% | 96.5% | 84.9% | 78.3% | 87.0% |
| 51.7 | 65.8% | 34.5% | 88.4% | 35.6% | 23.5% | 50.4% | 37.0% | 20.7% | 41.9% | 72.8% | 47.2% | 87.3% | 31.2% | 18.1% | 47.0% | 88.7% | 36.1% | 96.5% | 84.8% | 78.3% | 87.0% |
| 51.8 | 65.7% | 34.4% | 88.3% | 35.6% | 23.5% | 50.4% | 37.0% | 20.7% | 41.9% | 72.8% | 47.2% | 87.2% | 31.1% | 18.1% | 46.9% | 88.7% | 35.4% | 96.5% | 84.7% | 78.3% | 86.9% |
| 51.9 | 65.6% | 34.3% | 88.3% | 35.6% | 23.4% | 50.3% | 37.0% | 20.7% | 41.9% | 72.7% | 47.2% | 87.2% | 31.1% | 18.0% | 46.8% | 88.7% | 34.8% | 96.5% | 84.7% | 78.2% | 86.9% |
| 52   | 65.4% | 34.2% | 88.2% | 35.6% | 23.4% | 50.3% | 37.0% | 20.7% | 41.9% | 72.7% | 47.2% | 87.2% | 31.0% | 17.9% | 46.7% | 88.7% | 34.2% | 96.5% | 84.6% | 78.2% | 86.9% |
| 52.1 | 65.3% | 34.1% | 88.2% | 35.6% | 23.4% | 50.3% | 37.0% | 20.7% | 41.9% | 72.6% | 47.2% | 87.2% | 30.9% | 17.9% | 46.7% | 88.7% | 33.5% | 96.5% | 84.5% | 78.1% | 86.8% |
| 52.2 | 65.2% | 34.0% | 88.1% | 35.5% | 23.4% | 50.3% | 37.0% | 20.7% | 41.9% | 72.6% | 47.1% | 87.1% | 30.8% | 17.8% | 46.6% | 88.7% | 32.6% | 96.5% | 84.5% | 78.1% | 86.8% |
| 52.3 | 65.1% | 33.9% | 88.1% | 35.5% | 23.4% | 50.2% | 37.0% | 20.7% | 41.9% | 72.6% | 47.1% | 87.1% | 30.8% | 17.7% | 46.5% | 88.7% | 31.7% | 96.5% | 84.4% | 78.1% | 86.8% |
| 52.4 | 65.0% | 33.8% | 88.0% | 35.5% | 23.4% | 50.2% | 37.0% | 20.7% | 41.9% | 72.5% | 47.1% | 87.1% | 30.7% | 17.6% | 46.4% | 88.7% | 30.9% | 96.4% | 84.3% | 78.1% | 86.7% |
| 52.5 | 64.9% | 33.7% | 88.0% | 35.5% | 23.4% | 50.2% | 37.0% | 20.7% | 41.9% | 72.5% | 47.1% | 87.1% | 30.6% | 17.6% | 46.4% | 88.7% | 30.5% | 96.4% | 84.3% | 78.1% | 86.7% |
| 52.6 | 64.8% | 33.6% | 87.9% | 35.5% | 23.4% | 50.2% | 37.0% | 20.7% | 41.9% | 72.4% | 47.1% | 87.1% | 30.6% | 17.5% | 46.3% | 88.7% | 29.8% | 96.4% | 84.2% | 78.1% | 86.7% |
| 52.7 | 64.7% | 33.5% | 87.9% | 35.5% | 23.4% | 50.2% | 37.0% | 20.7% | 41.9% | 72.4% | 47.1% | 87.0% | 30.5% | 17.4% | 46.2% | 88.7% | 29.1% | 96.4% | 84.1% | 78.1% | 86.6% |
| 52.8 | 64.6% | 33.4% | 87.8% | 35.4% | 23.4% | 50.1% | 37.0% | 20.7% | 41.9% | 72.4% | 47.0% | 87.0% | 30.4% | 17.4% | 46.1% | 88.7% | 28.6% | 96.4% | 84.1% | 78.1% | 86.6% |
| 52.9 | 64.5% | 33.3% | 87.8% | 35.4% | 23.4% | 50.1% | 37.0% | 20.7% | 41.9% | 72.3% | 47.0% | 87.0% | 30.3% | 17.4% | 46.1% | 88.7% | 28.2% | 96.4% | 84.0% | 78.0% | 86.5% |
| 53   | 64.4% | 33.2% | 87.7% | 35.4% | 23.4% | 50.1% | 37.0% | 20.7% | 41.9% | 72.3% | 47.0% | 87.0% | 30.3% | 17.3% | 46.0% | 88.7% | 27.7% | 96.4% | 83.9% | 78.0% | 86.5% |
| 53.1 | 64.3% | 33.1% | 87.7% | 35.4% | 23.4% | 50.1% | 37.0% | 20.7% | 41.9% | 72.3% | 47.0% | 86.9% | 30.2% | 17.3% | 45.9% | 88.7% | 27.1% | 96.4% | 83.9% | 78.0% | 86.5% |
| 53.2 | 64.1% | 33.0% | 87.6% | 35.4% | 23.4% | 50.1% | 37.0% | 20.7% | 41.9% | 72.2% | 47.0% | 86.9% | 30.1% | 17.2% | 45.8% | 88.7% | 26.5% | 96.4% | 83.8% | 78.0% | 86.4% |
| 53.3 | 64.0% | 32.9% | 87.6% | 35.4% | 23.4% | 50.0% | 37.0% | 20.7% | 41.9% | 72.2% | 47.0% | 86.9% | 30.0% | 17.2% | 45.7% | 88.7% | 25.9% | 96.4% | 83.7% | 77.9% | 86.4% |
| 53.4 | 63.9% | 32.8% | 87.5% | 35.4% | 23.3% | 50.0% | 37.0% | 20.7% | 41.9% | 72.1% | 46.9% | 86.9% | 30.0% | 17.1% | 45.6% | 88.7% | 25.2% | 96.4% | 83.7% | 77.9% | 86.4% |
| 53.5 | 63.8% | 32.7% | 87.5% | 35.3% | 23.3% | 50.0% | 37.0% | 20.7% | 41.9% | 72.1% | 46.9% | 86.9% | 29.9% | 17.1% | 45.5% | 88.7% | 24.6% | 96.4% | 83.6% | 77.9% | 86.3% |
| 53.6 | 63.7% | 32.6% | 87.4% | 35.3% | 23.3% | 50.0% | 37.0% | 20.7% | 41.9% | 72.1% | 46.9% | 86.9% | 29.8% | 17.0% | 45.4% | 88.7% | 24.0% | 96.4% | 83.5% | 77.9% | 86.3% |
| 53.7 | 63.6% | 32.5% | 87.4% | 35.3% | 23.3% | 50.0% | 37.0% | 20.6% | 41.9% | 72.0% | 46.9% | 86.8% | 29.8% | 17.0% | 45.3% | 88.7% | 23.4% | 96.4% | 83.5% | 77.8% | 86.2% |

|      |       |       |       |       |       |       |       |       |       |       |       |       |       |       |       |       |       |       |       |       |       |
|------|-------|-------|-------|-------|-------|-------|-------|-------|-------|-------|-------|-------|-------|-------|-------|-------|-------|-------|-------|-------|-------|
| 53.8 | 63.5% | 32.4% | 87.3% | 35.3% | 23.3% | 49.9% | 37.0% | 20.5% | 41.9% | 72.0% | 46.9% | 86.8% | 29.7% | 16.9% | 45.2% | 88.7% | 22.9% | 96.4% | 83.4% | 77.8% | 86.2% |
| 53.9 | 63.4% | 32.3% | 87.3% | 35.3% | 23.3% | 49.9% | 37.0% | 20.5% | 41.9% | 71.9% | 46.9% | 86.8% | 29.6% | 16.8% | 45.2% | 88.7% | 22.4% | 96.4% | 83.3% | 77.7% | 86.2% |
| 54   | 63.3% | 32.2% | 87.2% | 35.3% | 23.3% | 49.9% | 37.0% | 20.5% | 41.9% | 71.9% | 46.8% | 86.8% | 29.5% | 16.8% | 45.1% | 88.7% | 21.9% | 96.4% | 83.2% | 77.6% | 86.1% |
| 54.1 | 63.2% | 32.2% | 87.2% | 35.3% | 23.3% | 49.9% | 37.0% | 20.5% | 41.9% | 71.9% | 46.8% | 86.8% | 29.5% | 16.7% | 45.0% | 88.7% | 21.5% | 96.4% | 83.2% | 77.6% | 86.1% |
| 54.2 | 63.1% | 32.1% | 87.1% | 35.3% | 23.3% | 49.9% | 37.0% | 20.5% | 41.9% | 71.8% | 46.8% | 86.8% | 29.4% | 16.7% | 44.9% | 88.7% | 21.0% | 96.4% | 83.1% | 77.6% | 86.0% |
| 54.3 | 63.0% | 32.0% | 87.1% | 35.2% | 23.3% | 49.8% | 37.0% | 20.5% | 41.9% | 71.8% | 46.8% | 86.8% | 29.3% | 16.6% | 44.8% | 88.7% | 20.5% | 96.4% | 83.0% | 77.6% | 86.0% |
| 54.4 | 62.9% | 31.9% | 87.0% | 35.2% | 23.3% | 49.8% | 37.0% | 20.5% | 41.9% | 71.8% | 46.8% | 86.7% | 29.3% | 16.6% | 44.7% | 88.7% | 20.1% | 96.4% | 83.0% | 77.6% | 86.0% |
| 54.5 | 62.8% | 31.8% | 87.0% | 35.2% | 23.3% | 49.8% | 37.0% | 20.5% | 41.9% | 71.7% | 46.8% | 86.7% | 29.2% | 16.5% | 44.6% | 88.7% | 19.7% | 96.4% | 82.9% | 77.6% | 85.9% |
| 54.6 | 62.7% | 31.7% | 86.9% | 35.2% | 23.3% | 49.8% | 37.0% | 20.4% | 41.9% | 71.7% | 46.7% | 86.7% | 29.1% | 16.4% | 44.5% | 88.7% | 19.3% | 96.4% | 82.8% | 77.5% | 85.8% |
| 54.7 | 62.6% | 31.6% | 86.9% | 35.2% | 23.3% | 49.8% | 37.0% | 20.3% | 41.9% | 71.6% | 46.7% | 86.7% | 29.0% | 16.4% | 44.4% | 88.7% | 18.8% | 96.4% | 82.7% | 77.4% | 85.8% |
| 54.8 | 62.5% | 31.5% | 86.8% | 35.2% | 23.3% | 49.8% | 37.0% | 20.3% | 41.9% | 71.6% | 46.6% | 86.7% | 29.0% | 16.3% | 44.3% | 88.7% | 18.4% | 96.4% | 82.7% | 77.4% | 85.8% |
| 54.9 | 62.4% | 31.4% | 86.8% | 35.2% | 23.3% | 49.7% | 37.0% | 20.3% | 41.9% | 71.6% | 46.6% | 86.7% | 28.9% | 16.3% | 44.3% | 88.7% | 18.0% | 96.4% | 82.6% | 77.3% | 85.8% |
| 55   | 62.3% | 31.3% | 86.7% | 35.2% | 23.2% | 49.7% | 37.0% | 20.3% | 41.9% | 71.5% | 46.5% | 86.6% | 28.8% | 16.2% | 44.2% | 88.7% | 17.6% | 96.4% | 82.5% | 77.3% | 85.7% |
| 55.1 | 62.2% | 31.2% | 86.7% | 35.1% | 23.2% | 49.7% | 37.0% | 20.3% | 41.9% | 71.5% | 46.4% | 86.6% | 28.8% | 16.2% | 44.1% | 88.7% | 17.2% | 96.4% | 82.5% | 77.2% | 85.7% |
| 55.2 | 62.1% | 31.1% | 86.7% | 35.1% | 23.2% | 49.7% | 37.0% | 20.3% | 41.9% | 71.4% | 46.3% | 86.5% | 28.7% | 16.1% | 44.0% | 88.7% | 16.8% | 96.4% | 82.4% | 77.2% | 85.7% |
| 55.3 | 62.0% | 31.0% | 86.6% | 35.1% | 23.2% | 49.7% | 37.0% | 20.2% | 41.9% | 71.4% | 46.3% | 86.5% | 28.6% | 16.1% | 43.9% | 88.7% | 16.4% | 96.4% | 82.3% | 77.2% | 85.6% |
| 55.4 | 61.9% | 30.9% | 86.6% | 35.1% | 23.2% | 49.7% | 37.0% | 20.2% | 41.9% | 71.4% | 46.2% | 86.5% | 28.6% | 16.0% | 43.8% | 88.7% | 16.1% | 96.4% | 82.2% | 77.1% | 85.6% |
| 55.5 | 61.8% | 30.8% | 86.5% | 35.1% | 23.2% | 49.7% | 37.0% | 20.1% | 41.9% | 71.3% | 46.1% | 86.4% | 28.5% | 15.9% | 43.7% | 88.7% | 15.6% | 96.4% | 82.2% | 77.0% | 85.6% |
| 55.6 | 61.7% | 30.7% | 86.5% | 35.1% | 23.2% | 49.6% | 37.0% | 20.0% | 41.9% | 71.3% | 46.1% | 86.4% | 28.4% | 15.9% | 43.6% | 88.7% | 15.2% | 96.4% | 82.1% | 76.9% | 85.6% |
| 55.7 | 61.6% | 30.5% | 86.4% | 35.1% | 23.2% | 49.6% | 37.0% | 19.9% | 41.9% | 71.2% | 46.0% | 86.4% | 28.3% | 15.8% | 43.5% | 88.7% | 14.8% | 96.4% | 82.0% | 76.9% | 85.5% |
| 55.8 | 61.5% | 30.4% | 86.4% | 35.1% | 23.2% | 49.6% | 37.0% | 19.8% | 41.9% | 71.2% | 45.9% | 86.3% | 28.3% | 15.8% | 43.4% | 88.7% | 14.4% | 96.4% | 81.9% | 76.9% | 85.5% |
| 55.9 | 61.4% | 30.3% | 86.3% | 35.1% | 23.2% | 49.6% | 37.0% | 19.8% | 41.9% | 71.2% | 45.8% | 86.3% | 28.2% | 15.7% | 43.4% | 88.7% | 14.0% | 96.4% | 81.9% | 76.8% | 85.4% |
| 56   | 61.3% | 30.2% | 86.3% | 35.1% | 23.2% | 49.6% | 37.0% | 19.8% | 41.9% | 71.1% | 45.8% | 86.3% | 28.1% | 15.7% | 43.3% | 88.7% | 13.6% | 96.4% | 81.8% | 76.7% | 85.4% |
| 56.1 | 61.2% | 30.1% | 86.2% | 35.0% | 23.1% | 49.6% | 37.0% | 19.8% | 41.9% | 71.1% | 45.7% | 86.3% | 28.1% | 15.6% | 43.2% | 88.7% | 13.2% | 96.4% | 81.7% | 76.6% | 85.4% |
| 56.2 | 61.1% | 30.0% | 86.2% | 35.0% | 23.1% | 49.6% | 37.0% | 19.7% | 41.9% | 71.0% | 45.6% | 86.3% | 28.0% | 15.6% | 43.1% | 88.7% | 12.9% | 96.4% | 81.6% | 76.5% | 85.4% |
| 56.3 | 61.0% | 29.9% | 86.1% | 35.0% | 23.1% | 49.5% | 37.0% | 19.7% | 41.9% | 71.0% | 45.5% | 86.3% | 27.9% | 15.5% | 43.0% | 88.7% | 12.5% | 96.4% | 81.6% | 76.4% | 85.3% |
| 56.4 | 60.9% | 29.8% | 86.1% | 35.0% | 23.1% | 49.5% | 37.0% | 19.7% | 41.9% | 71.0% | 45.5% | 86.3% | 27.9% | 15.5% | 43.0% | 88.7% | 12.2% | 96.4% | 81.5% | 76.4% | 85.3% |
| 56.5 | 60.8% | 29.7% | 86.0% | 35.0% | 23.1% | 49.5% | 37.0% | 19.7% | 41.9% | 70.9% | 45.4% | 86.2% | 27.8% | 15.4% | 42.9% | 88.7% | 12.0% | 96.4% | 81.4% | 76.3% | 85.3% |
| 56.6 | 60.7% | 29.6% | 86.0% | 35.0% | 23.1% | 49.5% | 37.0% | 19.7% | 41.9% | 70.9% | 45.3% | 86.2% | 27.7% | 15.4% | 42.8% | 88.7% | 11.7% | 96.4% | 81.3% | 76.2% | 85.2% |
| 56.7 | 60.6% | 29.5% | 85.9% | 35.0% | 23.1% | 49.5% | 37.0% | 19.7% | 41.9% | 70.8% | 45.3% | 86.2% | 27.7% | 15.4% | 42.8% | 88.7% | 11.4% | 96.4% | 81.2% | 76.1% | 85.2% |
| 56.8 | 60.5% | 29.4% | 85.9% | 35.0% | 23.1% | 49.5% | 37.0% | 19.7% | 41.9% | 70.8% | 45.2% | 86.2% | 27.6% | 15.3% | 42.7% | 88.7% | 11.1% | 96.4% | 81.2% | 76.0% | 85.2% |
| 56.9 | 60.4% | 29.3% | 85.8% | 35.0% | 23.1% | 49.5% | 37.0% | 19.7% | 41.9% | 70.8% | 45.1% | 86.2% | 27.5% | 15.3% | 42.6% | 88.7% | 10.8% | 96.4% | 81.1% | 76.0% | 85.2% |

|      |       |       |       |       |       |       |       |       |       |       |       |       |       |       |       |       |       |       |       |       |       |
|------|-------|-------|-------|-------|-------|-------|-------|-------|-------|-------|-------|-------|-------|-------|-------|-------|-------|-------|-------|-------|-------|
| 57   | 60.3% | 29.2% | 85.8% | 35.0% | 23.1% | 49.5% | 37.0% | 19.7% | 41.9% | 70.7% | 45.0% | 86.2% | 27.4% | 15.2% | 42.5% | 88.7% | 10.5% | 96.4% | 81.0% | 75.9% | 85.1% |
| 57.1 | 60.2% | 29.1% | 85.7% | 35.0% | 23.1% | 49.5% | 37.0% | 19.7% | 41.9% |       |       |       | 27.4% | 15.2% | 42.4% | 88.7% | 10.2% | 96.4% | 80.9% | 75.8% | 85.1% |
| 57.2 | 60.2% | 29.0% | 85.7% | 35.0% | 23.1% | 49.4% | 37.0% | 19.7% | 41.9% |       |       |       | 27.3% | 15.1% | 42.3% | 88.7% | 10.0% | 96.4% | 80.9% | 75.7% | 85.0% |
| 57.3 | 60.1% | 28.9% | 85.6% | 35.0% | 23.1% | 49.4% | 37.0% | 19.7% | 41.8% |       |       |       | 27.2% | 15.1% | 42.2% | 88.7% | 9.7%  | 96.4% | 80.8% | 75.6% | 85.0% |
| 57.4 | 60.0% | 28.8% | 85.6% | 34.9% | 23.1% | 49.4% | 37.0% | 19.7% | 41.8% |       |       |       | 27.2% | 15.0% | 42.1% | 88.7% | 9.5%  | 96.4% | 80.7% | 75.5% | 85.0% |
| 57.5 | 59.9% | 28.7% | 85.5% | 34.9% | 23.1% | 49.4% | 37.0% | 19.7% | 41.8% |       |       |       | 27.1% | 14.9% | 42.0% | 88.7% | 9.2%  | 96.4% | 80.6% | 75.3% | 84.9% |
| 57.6 | 59.8% | 28.6% | 85.5% | 34.9% | 23.1% | 49.4% | 37.0% | 19.7% | 41.8% |       |       |       | 27.0% | 14.9% | 41.9% | 88.7% | 8.9%  | 96.4% | 80.5% | 75.2% | 84.9% |
| 57.7 | 59.7% | 28.5% | 85.4% | 34.9% | 23.1% | 49.4% | 37.0% | 19.7% | 41.8% |       |       |       | 27.0% | 14.8% | 41.8% | 88.7% | 8.7%  | 96.4% | 80.5% | 75.1% | 84.8% |
| 57.8 | 59.6% | 28.4% | 85.4% | 34.9% | 23.1% | 49.4% | 37.0% | 19.7% | 41.8% |       |       |       | 26.9% | 14.8% | 41.7% | 88.7% | 8.4%  | 96.4% | 80.4% | 75.0% | 84.8% |
| 57.9 | 59.5% | 28.3% | 85.4% | 34.9% | 23.1% | 49.4% | 37.0% | 19.7% | 41.8% |       |       |       | 26.8% | 14.7% | 41.6% | 88.7% | 8.2%  | 96.4% | 80.3% | 74.8% | 84.8% |
| 58   | 59.5% | 28.3% | 85.3% | 34.9% | 23.1% | 49.4% | 37.0% | 19.7% | 41.8% |       |       |       | 26.8% | 14.7% | 41.5% | 88.7% | 8.0%  | 96.4% | 80.2% | 74.7% | 84.8% |
| 58.1 | 59.4% | 28.2% | 85.3% | 34.9% | 23.1% | 49.4% |       |       |       |       |       |       |       |       |       |       |       |       |       |       |       |
| 58.2 | 59.3% | 28.1% | 85.2% | 34.9% | 23.1% | 49.4% |       |       |       |       |       |       |       |       |       |       |       |       |       |       |       |
| 58.3 | 59.2% | 28.1% | 85.2% | 34.9% | 23.1% | 49.3% |       |       |       |       |       |       |       |       |       |       |       |       |       |       |       |
| 58.4 | 59.1% | 28.0% | 85.1% | 34.9% | 23.1% | 49.3% |       |       |       |       |       |       |       |       |       |       |       |       |       |       |       |
| 58.5 | 59.0% | 27.9% | 85.1% | 34.9% | 23.1% | 49.3% |       |       |       |       |       |       |       |       |       |       |       |       |       |       |       |
| 58.6 | 59.0% | 27.9% | 85.0% | 34.9% | 23.1% | 49.3% |       |       |       |       |       |       |       |       |       |       |       |       |       |       |       |
| 58.7 | 58.9% | 27.8% | 85.0% | 34.9% | 23.1% | 49.3% |       |       |       |       |       |       |       |       |       |       |       |       |       |       |       |
| 58.8 | 58.8% | 27.7% | 85.0% | 34.9% | 23.1% | 49.3% |       |       |       |       |       |       |       |       |       |       |       |       |       |       |       |
| 58.9 | 58.7% | 27.6% | 84.9% | 34.9% | 23.1% | 49.3% |       |       |       |       |       |       |       |       |       |       |       |       |       |       |       |
| 59   | 58.7% | 27.5% | 84.9% | 34.9% | 23.1% | 49.3% |       |       |       |       |       |       |       |       |       |       |       |       |       |       |       |
| 59.1 | 58.6% | 27.5% | 84.8% | 34.9% | 23.1% | 49.3% |       |       |       |       |       |       |       |       |       |       |       |       |       |       |       |
| 59.2 | 58.5% | 27.4% | 84.8% | 34.9% | 23.1% | 49.3% |       |       |       |       |       |       |       |       |       |       |       |       |       |       |       |
| 59.3 | 58.4% | 27.3% | 84.7% | 34.9% | 23.1% | 49.3% |       |       |       |       |       |       |       |       |       |       |       |       |       |       |       |
| 59.4 | 58.4% | 27.3% | 84.7% | 34.9% | 23.1% | 49.3% |       |       |       |       |       |       |       |       |       |       |       |       |       |       |       |
| 59.5 | 58.3% | 27.2% | 84.6% | 34.9% | 23.1% | 49.3% |       |       |       |       |       |       |       |       |       |       |       |       |       |       |       |
| 59.6 | 58.2% | 27.1% | 84.6% | 34.9% | 23.1% | 49.3% |       |       |       |       |       |       |       |       |       |       |       |       |       |       |       |
| 59.7 | 58.2% | 27.0% | 84.6% | 34.9% | 23.1% | 49.3% |       |       |       |       |       |       |       |       |       |       |       |       |       |       |       |
| 59.8 | 58.1% | 27.0% | 84.5% | 34.8% | 23.1% | 49.3% |       |       |       |       |       |       |       |       |       |       |       |       |       |       |       |
| 59.9 | 58.0% | 26.9% | 84.5% | 34.8% | 23.0% | 49.3% |       |       |       |       |       |       |       |       |       |       |       |       |       |       |       |
| 60   | 58.0% | 26.8% | 84.4% | 34.8% | 23.0% | 49.3% |       |       |       |       |       |       |       |       |       |       |       |       |       |       |       |
| 60.1 | 57.9% | 26.7% | 84.4% | 34.8% | 23.0% | 49.2% |       |       |       |       |       |       |       |       |       |       |       |       |       |       |       |

|      |       |       |       |       |       |       |
|------|-------|-------|-------|-------|-------|-------|
| 60.2 | 57.8% | 26.7% | 84.4% | 34.8% | 23.0% | 49.2% |
| 60.3 | 57.8% | 26.6% | 84.3% | 34.8% | 23.0% | 49.1% |
| 60.4 | 57.7% | 26.5% | 84.3% | 34.8% | 22.9% | 49.1% |
| 60.5 | 57.6% | 26.4% | 84.2% | 34.8% | 22.9% | 49.0% |
| 60.6 | 57.6% | 26.3% | 84.2% | 34.8% | 22.9% | 49.0% |
| 60.7 | 57.5% | 26.3% | 84.2% | 34.8% | 22.8% | 49.0% |
| 60.8 | 57.4% | 26.2% | 84.1% | 34.8% | 22.8% | 49.0% |
| 60.9 | 57.4% | 26.2% | 84.1% | 34.8% | 22.7% | 49.0% |
| 61   | 57.3% | 26.1% | 84.0% | 34.8% | 22.7% | 49.0% |
| 61.1 | 57.3% | 26.1% | 84.0% | 34.8% | 22.7% | 49.0% |
| 61.2 | 57.2% | 26.0% | 84.0% | 34.8% | 22.6% | 49.0% |
| 61.3 | 57.2% | 26.0% | 83.9% | 34.8% | 22.6% | 49.0% |
| 61.4 | 57.1% | 25.9% | 83.9% | 34.8% | 22.6% | 49.0% |
| 61.5 | 57.1% | 25.8% | 83.8% | 34.8% | 22.6% | 48.9% |
| 61.6 | 57.0% | 25.8% | 83.8% | 34.8% | 22.6% | 48.9% |
| 61.7 | 56.9% | 25.7% | 83.8% | 34.8% | 22.6% | 48.8% |
| 61.8 | 56.9% | 25.7% | 83.7% | 34.9% | 22.6% | 48.8% |
| 61.9 | 56.8% | 25.6% | 83.7% | 34.9% | 22.6% | 48.8% |
| 62   | 56.8% | 25.6% | 83.6% | 34.9% | 22.6% | 48.8% |
| 62.1 | 56.7% | 25.6% | 83.6% | 34.9% | 22.6% | 48.8% |
| 62.2 | 56.7% | 25.5% | 83.6% | 34.9% | 22.6% | 48.8% |
| 62.3 | 56.7% | 25.5% | 83.5% | 34.9% | 22.6% | 48.8% |
| 62.4 | 56.6% | 25.4% | 83.5% | 34.9% | 22.6% | 48.8% |
| 62.5 | 56.6% | 25.4% | 83.5% | 34.9% | 22.6% | 48.8% |
| 62.6 | 56.5% | 25.4% | 83.4% | 34.9% | 22.6% | 48.8% |
| 62.7 | 56.5% | 25.3% | 83.4% | 34.9% | 22.6% | 48.8% |
| 62.8 | 56.4% | 25.3% | 83.4% | 34.9% | 22.6% | 48.7% |
| 62.9 | 56.4% | 25.3% | 83.3% | 34.9% | 22.6% | 48.7% |
| 63   | 56.4% | 25.3% | 83.3% | 34.9% | 22.6% | 48.7% |
| 63.1 | 56.3% | 25.2% | 83.3% | 34.9% | 22.6% | 48.7% |
| 63.2 | 56.3% | 25.2% | 83.2% | 34.9% | 22.6% | 48.7% |
| 63.3 | 56.2% | 25.2% | 83.2% | 34.9% | 22.6% | 48.7% |

|      |       |       |       |       |       |       |
|------|-------|-------|-------|-------|-------|-------|
| 63.4 | 56.2% | 25.1% | 83.2% | 34.9% | 22.6% | 48.7% |
| 63.5 | 56.2% | 25.1% | 83.1% | 34.9% | 22.6% | 48.7% |
| 63.6 | 56.1% | 25.1% | 83.1% | 34.9% | 22.6% | 48.6% |
| 63.7 | 56.1% | 25.1% | 83.1% | 34.9% | 22.6% | 48.6% |
| 63.8 | 56.1% | 25.0% | 83.0% | 34.9% | 22.6% | 48.6% |
| 63.9 | 56.0% | 25.0% | 83.0% | 34.9% | 22.6% | 48.5% |
| 64   | 56.0% | 25.0% | 83.0% | 34.9% | 22.6% | 48.5% |
| 64.1 | 56.0% | 25.0% | 83.0% | 34.9% | 22.6% | 48.5% |
| 64.2 | 55.9% | 25.0% | 83.0% | 34.9% | 22.6% | 48.5% |
| 64.3 | 55.9% | 24.9% | 82.9% | 34.9% | 22.6% | 48.5% |
| 64.4 | 55.9% | 24.9% | 82.9% | 34.9% | 22.6% | 48.5% |
| 64.5 | 55.9% | 24.9% | 82.9% | 34.9% | 22.6% | 48.4% |
| 64.6 | 55.8% | 24.8% | 82.9% | 34.9% | 22.6% | 48.4% |
| 64.7 | 55.8% | 24.8% | 82.9% | 34.9% | 22.6% | 48.3% |
| 64.8 | 55.8% | 24.7% | 82.9% | 34.9% | 22.5% | 48.2% |
| 64.9 | 55.8% | 24.6% | 82.8% | 34.9% | 22.5% | 48.2% |
| 65   | 55.7% | 24.6% | 82.8% | 34.9% | 22.5% | 48.2% |
| 65.1 | 55.7% | 24.5% | 82.8% | 34.9% | 22.5% | 48.2% |
| 65.2 | 55.7% | 24.5% | 82.8% | 34.9% | 22.5% | 48.2% |
| 65.3 | 55.7% | 24.4% | 82.8% | 34.9% | 22.5% | 48.2% |
| 65.4 | 55.7% | 24.3% | 82.8% | 34.9% | 22.5% | 48.2% |
| 65.5 | 55.6% | 24.3% | 82.8% | 34.8% | 22.5% | 48.2% |
| 65.6 | 55.6% | 24.2% | 82.8% | 34.8% | 22.5% | 48.2% |
| 65.7 | 55.6% | 24.2% | 82.7% | 34.8% | 22.4% | 48.2% |
| 65.8 | 55.6% | 24.2% | 82.7% | 34.8% | 22.4% | 48.2% |
| 65.9 | 55.6% | 24.2% | 82.7% | 34.8% | 22.4% | 48.2% |
| 66   | 55.6% | 24.2% | 82.7% | 34.8% | 22.4% | 48.2% |
| 66.1 | 55.6% | 24.2% | 82.7% | 34.8% | 22.4% | 48.2% |
| 66.2 | 55.5% | 24.2% | 82.7% | 34.8% | 22.4% | 48.2% |
| 66.3 | 55.5% | 24.2% | 82.7% | 34.8% | 22.4% | 48.1% |
| 66.4 | 55.5% | 24.2% | 82.7% | 34.7% | 22.3% | 48.1% |
| 66.5 | 55.5% | 24.1% | 82.7% | 34.7% | 22.3% | 48.1% |

|      |       |       |       |       |       |       |
|------|-------|-------|-------|-------|-------|-------|
| 66.6 | 55.5% | 24.0% | 82.7% | 34.7% | 22.3% | 48.1% |
| 66.7 | 55.5% | 24.0% | 82.7% | 34.7% | 22.3% | 48.0% |
| 66.8 | 55.5% | 23.9% | 82.7% | 34.7% | 22.3% | 48.0% |
| 66.9 | 55.5% | 23.8% | 82.7% | 34.7% | 22.2% | 48.0% |
| 67   | 55.5% | 23.8% | 82.7% | 34.7% | 22.2% | 47.9% |
| 67.1 | 55.5% | 23.7% | 82.7% | 34.6% | 22.1% | 47.9% |
| 67.2 | 55.5% | 23.7% | 82.7% | 34.6% | 22.1% | 47.8% |
| 67.3 | 55.5% | 23.7% | 82.7% | 34.6% | 22.1% | 47.8% |
| 67.4 | 55.5% | 23.7% | 82.7% | 34.6% | 22.1% | 47.8% |
| 67.5 | 55.5% | 23.7% | 82.7% | 34.6% | 22.1% | 47.7% |
| 67.6 | 55.5% | 23.6% | 82.7% | 34.5% | 22.1% | 47.7% |
| 67.7 | 55.5% | 23.6% | 82.7% | 34.5% | 22.1% | 47.6% |
| 67.8 | 55.5% | 23.6% | 82.7% | 34.5% | 22.0% | 47.6% |
| 67.9 | 55.5% | 23.6% | 82.7% | 34.5% | 22.0% | 47.5% |
| 68   | 55.5% | 23.5% | 82.7% | 34.5% | 22.0% | 47.5% |
| 68.1 | 55.5% | 23.5% | 82.7% | 34.4% | 22.0% | 47.5% |
| 68.2 | 55.5% | 23.5% | 82.6% | 34.4% | 22.0% | 47.4% |
| 68.3 | 55.5% | 23.5% | 82.6% | 34.4% | 22.0% | 47.4% |
| 68.4 | 55.5% | 23.5% | 82.6% | 34.4% | 22.0% | 47.4% |
| 68.5 | 55.5% | 23.4% | 82.6% | 34.3% | 22.0% | 47.4% |
| 68.6 | 55.5% | 23.4% | 82.6% | 34.3% | 22.0% | 47.4% |
| 68.7 | 55.5% | 23.4% | 82.6% | 34.3% | 22.0% | 47.4% |
| 68.8 | 55.5% | 23.4% | 82.6% | 34.3% | 22.0% | 47.4% |
| 68.9 | 55.5% | 23.4% | 82.5% | 34.2% | 22.0% | 47.4% |
| 69   | 55.5% | 23.3% | 82.5% | 34.2% | 22.0% | 47.4% |
| 69.1 | 55.5% | 23.3% | 82.5% | 34.2% | 22.0% | 47.4% |
| 69.2 | 55.5% | 23.3% | 82.5% | 34.1% | 22.0% | 47.4% |
| 69.3 | 55.5% | 23.3% | 82.5% | 34.1% | 21.9% | 47.4% |
| 69.4 | 55.5% | 23.3% | 82.5% | 34.1% | 21.9% | 47.4% |
| 69.5 | 55.5% | 23.2% | 82.5% | 34.1% | 21.8% | 47.4% |
| 69.6 | 55.5% | 23.2% | 82.4% | 34.0% | 21.7% | 47.4% |
| 69.7 | 55.5% | 23.2% | 82.4% | 34.0% | 21.7% | 47.3% |



|      |       |       |       |       |       |       |
|------|-------|-------|-------|-------|-------|-------|
| 69.8 | 55.5% | 23.2% | 82.4% | 34.0% | 21.6% | 47.3% |
| 69.9 | 55.5% | 23.2% | 82.4% | 33.9% | 21.6% | 47.2% |
| 70   | 55.5% | 23.1% | 82.4% | 33.9% | 21.5% | 47.1% |
| 70.1 | 55.5% | 23.1% | 82.4% | 33.9% | 21.4% | 47.0% |
| 70.2 | 55.5% | 23.1% | 82.4% | 33.8% | 21.4% | 47.0% |
| 70.3 | 55.5% | 23.1% | 82.3% | 33.8% | 21.3% | 47.0% |
| 70.4 | 55.5% | 23.1% | 82.3% | 33.7% | 21.3% | 47.0% |
| 70.5 | 55.5% | 23.0% | 82.3% | 33.7% | 21.2% | 46.9% |
| 70.6 | 55.5% | 23.0% | 82.3% | 33.7% | 21.1% | 46.9% |
| 70.7 | 55.5% | 23.0% | 82.3% | 33.6% | 21.1% | 46.8% |
| 70.8 | 55.5% | 22.9% | 82.3% | 33.6% | 21.0% | 46.8% |
| 70.9 | 55.5% | 22.8% | 82.3% | 33.6% | 21.0% | 46.7% |
| 71   | 55.5% | 22.8% | 82.2% | 33.5% | 20.9% | 46.7% |
| 71.1 | 55.5% | 22.7% | 82.2% | 33.5% | 20.9% | 46.6% |
| 71.2 | 55.5% | 22.6% | 82.2% | 33.4% | 20.9% | 46.6% |
| 71.3 | 55.5% | 22.6% | 82.2% | 33.4% | 20.8% | 46.6% |
| 71.4 | 55.5% | 22.5% | 82.2% | 33.4% | 20.8% | 46.6% |
| 71.5 | 55.5% | 22.4% | 82.2% | 33.3% | 20.8% | 46.6% |
| 71.6 | 55.5% | 22.4% | 82.2% | 33.3% | 20.7% | 46.5% |
| 71.7 | 55.5% | 22.4% | 82.1% | 33.2% | 20.7% | 46.4% |
| 71.8 | 55.5% | 22.4% | 82.1% | 33.2% | 20.6% | 46.3% |
| 71.9 | 55.5% | 22.4% | 82.1% | 33.2% | 20.6% | 46.2% |
| 72   | 55.5% | 22.4% | 82.1% | 33.1% | 20.6% | 46.1% |
| 72.1 | 55.5% | 22.4% | 82.1% | 33.1% | 20.5% | 46.1% |
| 72.2 | 55.5% | 22.4% | 82.1% | 33.0% | 20.5% | 46.1% |
| 72.3 | 55.5% | 22.4% | 82.1% | 33.0% | 20.4% | 46.1% |
| 72.4 | 55.5% | 22.3% | 82.0% | 32.9% | 20.4% | 46.1% |
| 72.5 | 55.5% | 22.3% | 82.0% | 32.9% | 20.3% | 46.0% |
| 72.6 | 55.5% | 22.3% | 82.0% | 32.8% | 20.3% | 46.0% |
| 72.7 | 55.5% | 22.2% | 82.0% | 32.8% | 20.2% | 46.0% |
| 72.8 | 55.5% | 22.2% | 82.0% | 32.7% | 20.2% | 46.0% |
| 72.9 | 55.5% | 22.2% | 82.0% | 32.7% | 20.1% | 46.0% |

|      |       |       |       |       |       |       |
|------|-------|-------|-------|-------|-------|-------|
| 73   | 55.5% | 22.2% | 82.0% | 32.6% | 20.1% | 46.0% |
| 73.1 | 55.5% | 22.2% | 82.0% | 32.6% | 20.0% | 46.0% |
| 73.2 | 55.5% | 22.1% | 82.0% | 32.5% | 20.0% | 46.0% |
| 73.3 | 55.5% | 22.1% | 81.9% | 32.5% | 19.9% | 46.0% |
| 73.4 | 55.5% | 22.0% | 81.9% | 32.4% | 19.9% | 46.0% |
| 73.5 | 55.5% | 21.9% | 81.9% | 32.4% | 19.8% | 46.0% |
| 73.6 | 55.5% | 21.9% | 81.9% | 32.3% | 19.8% | 45.9% |
| 73.7 | 55.5% | 21.8% | 81.9% | 32.3% | 19.7% | 45.9% |
| 73.8 | 55.5% | 21.8% | 81.8% | 32.2% | 19.7% | 45.8% |
| 73.9 | 55.5% | 21.8% | 81.8% | 32.2% | 19.6% | 45.8% |
| 74   | 55.5% | 21.7% | 81.8% | 32.1% | 19.6% | 45.7% |
| 74.1 | 55.5% | 21.7% | 81.8% | 32.1% | 19.5% | 45.6% |
| 74.2 | 55.5% | 21.7% | 81.8% | 32.0% | 19.5% | 45.5% |
| 74.3 | 55.5% | 21.6% | 81.8% | 32.0% | 19.4% | 45.4% |
| 74.4 | 55.5% | 21.6% | 81.8% | 31.9% | 19.4% | 45.3% |
| 74.5 | 55.5% | 21.5% | 81.8% | 31.8% | 19.3% | 45.3% |
| 74.6 | 55.5% | 21.5% | 81.8% | 31.8% | 19.2% | 45.2% |
| 74.7 | 55.5% | 21.5% | 81.8% | 31.7% | 19.1% | 45.0% |
| 74.8 | 55.5% | 21.5% | 81.8% | 31.7% | 19.0% | 44.9% |
| 74.9 | 55.5% | 21.5% | 81.8% | 31.6% | 19.0% | 44.9% |
| 75   | 55.5% | 21.4% | 81.8% | 31.6% | 18.9% | 44.9% |
| 75.1 | 55.5% | 21.4% | 81.8% | 31.5% | 18.9% | 44.9% |
| 75.2 | 55.5% | 21.3% | 81.8% | 31.4% | 18.8% | 44.8% |
| 75.3 | 55.5% | 21.3% | 81.8% | 31.4% | 18.7% | 44.8% |
| 75.4 | 55.5% | 21.2% | 81.8% | 31.3% | 18.6% | 44.7% |
| 75.5 | 55.5% | 21.2% | 81.8% | 31.3% | 18.5% | 44.7% |
| 75.6 | 55.5% | 21.1% | 81.8% | 31.2% | 18.5% | 44.7% |
| 75.7 | 55.5% | 21.1% | 81.8% | 31.2% | 18.4% | 44.7% |
| 75.8 | 55.5% | 21.0% | 81.8% | 31.1% | 18.3% | 44.7% |
| 75.9 | 55.5% | 21.0% | 81.8% | 31.0% | 18.2% | 44.7% |
| 76   | 55.5% | 20.9% | 81.8% | 31.0% | 18.1% | 44.7% |
| 76.1 | 55.5% | 20.9% | 81.8% | 30.9% | 17.9% | 44.7% |

|      |       |       |       |       |       |       |
|------|-------|-------|-------|-------|-------|-------|
| 76.2 | 55.5% | 20.8% | 81.8% | 30.9% | 17.8% | 44.7% |
| 76.3 | 55.5% | 20.8% | 81.8% | 30.8% | 17.7% | 44.7% |
| 76.4 | 55.5% | 20.7% | 81.8% | 30.8% | 17.6% | 44.7% |
| 76.5 | 55.5% | 20.7% | 81.8% | 30.7% | 17.4% | 44.7% |
| 76.6 | 55.5% | 20.6% | 81.8% | 30.6% | 17.3% | 44.7% |
| 76.7 | 55.5% | 20.5% | 81.8% | 30.6% | 17.2% | 44.7% |
| 76.8 | 55.5% | 20.4% | 81.8% | 30.5% | 17.2% | 44.7% |
| 76.9 | 55.5% | 20.3% | 81.8% | 30.5% | 17.1% | 44.7% |
| 77   | 55.5% | 20.2% | 81.8% | 30.4% | 17.0% | 44.7% |
| 77.1 | 55.5% | 20.1% | 81.8% | 30.4% | 16.9% | 44.7% |
| 77.2 | 55.5% | 20.1% | 81.8% | 30.3% | 16.7% | 44.7% |
| 77.3 | 55.5% | 20.0% | 81.8% | 30.3% | 16.7% | 44.7% |
| 77.4 | 55.5% | 19.9% | 81.8% | 30.2% | 16.6% | 44.7% |
| 77.5 | 55.5% | 19.8% | 81.8% | 30.1% | 16.6% | 44.7% |
| 77.6 | 55.5% | 19.7% | 81.8% | 30.1% | 16.5% | 44.7% |
| 77.7 | 55.5% | 19.6% | 81.8% | 30.0% | 16.4% | 44.7% |
| 77.8 | 55.5% | 19.5% | 81.8% | 30.0% | 16.4% | 44.7% |
| 77.9 | 55.5% | 19.5% | 81.8% | 29.9% | 16.4% | 44.7% |
| 78   | 55.5% | 19.4% | 81.8% | 29.9% | 16.3% | 44.7% |
| 78.1 | 55.5% | 19.3% | 81.8% | 29.8% | 16.2% | 44.7% |
| 78.2 | 55.5% | 19.3% | 81.8% | 29.8% | 16.2% | 44.7% |
| 78.3 | 55.5% | 19.2% | 81.8% | 29.7% | 16.1% | 44.6% |
| 78.4 | 55.5% | 19.2% | 81.8% | 29.6% | 16.0% | 44.6% |
| 78.5 | 55.5% | 19.1% | 81.8% | 29.6% | 16.0% | 44.5% |
| 78.6 | 55.5% | 19.1% | 81.8% | 29.5% | 15.9% | 44.5% |
| 78.7 | 55.5% | 19.0% | 81.8% | 29.5% | 15.8% | 44.4% |
| 78.8 | 55.5% | 19.0% | 81.8% | 29.4% | 15.7% | 44.4% |
| 78.9 | 55.5% | 18.9% | 81.8% | 29.4% | 15.6% | 44.3% |
| 79   | 55.5% | 18.9% | 81.8% | 29.3% | 15.5% | 44.2% |
| 79.1 | 55.5% | 18.9% | 81.8% | 29.3% | 15.4% | 44.1% |
| 79.2 | 55.5% | 18.9% | 81.8% | 29.2% | 15.4% | 44.0% |
| 79.3 | 55.5% | 18.9% | 81.8% | 29.1% | 15.4% | 44.0% |

|      |       |       |       |       |       |       |
|------|-------|-------|-------|-------|-------|-------|
| 79.4 | 55.5% | 18.9% | 81.8% | 29.1% | 15.3% | 44.0% |
| 79.5 | 55.5% | 18.9% | 81.8% | 29.0% | 15.3% | 44.0% |
| 79.6 | 55.5% | 18.9% | 81.7% | 29.0% | 15.2% | 43.9% |
| 79.7 | 55.5% | 18.9% | 81.7% | 28.9% | 15.1% | 43.9% |
| 79.8 | 55.5% | 18.9% | 81.7% | 28.9% | 15.1% | 43.8% |
| 79.9 | 55.5% | 18.8% | 81.7% | 28.8% | 15.0% | 43.8% |
| 80   | 55.5% | 18.8% | 81.7% | 28.8% | 14.9% | 43.8% |
| 80.1 |       |       |       | 28.7% | 14.9% | 43.8% |
| 80.2 |       |       |       | 28.7% | 14.8% | 43.8% |
| 80.3 |       |       |       | 28.6% | 14.7% | 43.8% |
| 80.4 |       |       |       | 28.6% | 14.6% | 43.8% |
| 80.5 |       |       |       | 28.5% | 14.6% | 43.8% |
| 80.6 |       |       |       | 28.4% | 14.5% | 43.8% |
| 80.7 |       |       |       | 28.4% | 14.5% | 43.8% |
| 80.8 |       |       |       | 28.3% | 14.4% | 43.8% |
| 80.9 |       |       |       | 28.3% | 14.3% | 43.8% |
| 81   |       |       |       | 28.2% | 14.2% | 43.8% |
| 81.1 |       |       |       | 28.2% | 14.2% | 43.8% |
| 81.2 |       |       |       | 28.1% | 14.1% | 43.8% |
| 81.3 |       |       |       | 28.1% | 14.0% | 43.8% |
| 81.4 |       |       |       | 28.0% | 13.8% | 43.8% |
| 81.5 |       |       |       | 28.0% | 13.7% | 43.7% |
| 81.6 |       |       |       | 27.9% | 13.6% | 43.7% |
| 81.7 |       |       |       | 27.9% | 13.6% | 43.7% |
| 81.8 |       |       |       | 27.8% | 13.5% | 43.7% |
| 81.9 |       |       |       | 27.7% | 13.4% | 43.7% |
| 82   |       |       |       | 27.7% | 13.3% | 43.7% |
| 82.1 |       |       |       | 27.6% | 13.2% | 43.7% |
| 82.2 |       |       |       | 27.6% | 13.1% | 43.7% |
| 82.3 |       |       |       | 27.5% | 13.0% | 43.7% |
| 82.4 |       |       |       | 27.5% | 13.0% | 43.7% |
| 82.5 |       |       |       | 27.4% | 12.9% | 43.7% |

|      |       |       |       |
|------|-------|-------|-------|
| 82.6 | 27.4% | 12.8% | 43.7% |
| 82.7 | 27.3% | 12.8% | 43.7% |
| 82.8 | 27.3% | 12.7% | 43.6% |
| 82.9 | 27.2% | 12.7% | 43.6% |
| 83   | 27.2% | 12.6% | 43.5% |
| 83.1 | 27.1% | 12.6% | 43.4% |
| 83.2 | 27.1% | 12.5% | 43.3% |
| 83.3 | 27.0% | 12.4% | 43.2% |
| 83.4 | 27.0% | 12.4% | 43.2% |
| 83.5 | 26.9% | 12.3% | 43.2% |
| 83.6 | 26.9% | 12.2% | 43.2% |
| 83.7 | 26.8% | 12.1% | 43.2% |
| 83.8 | 26.8% | 12.0% | 43.2% |
| 83.9 | 26.7% | 12.0% | 43.2% |
| 84   | 26.7% | 12.0% | 43.2% |
| 84.1 | 26.6% | 11.9% | 43.2% |
| 84.2 | 26.5% | 11.8% | 43.2% |
| 84.3 | 26.5% | 11.7% | 43.2% |
| 84.4 | 26.4% | 11.7% | 43.2% |
| 84.5 | 26.4% | 11.6% | 43.2% |
| 84.6 | 26.3% | 11.5% | 43.2% |
| 84.7 | 26.3% | 11.4% | 43.2% |
| 84.8 | 26.2% | 11.3% | 43.2% |
| 84.9 | 26.2% | 11.3% | 43.2% |
| 85   | 26.1% | 11.2% | 43.2% |
| 85.1 | 26.1% | 11.1% | 43.2% |
| 85.2 | 26.0% | 11.1% | 43.2% |
| 85.3 | 26.0% | 11.0% | 43.2% |
| 85.4 | 25.9% | 10.9% | 43.2% |
| 85.5 | 25.9% | 10.8% | 43.2% |
| 85.6 | 25.8% | 10.8% | 43.2% |
| 85.7 | 25.8% | 10.7% | 43.2% |

|      |       |       |       |
|------|-------|-------|-------|
| 85.8 | 25.7% | 10.6% | 43.2% |
| 85.9 | 25.7% | 10.6% | 43.2% |
| 86   | 25.6% | 10.5% | 43.2% |

---

**Table S3 Risk of Bias Assessment for Case-Control Studies**

| First author's name             | 1   | 2   | 3   | 4   | 5   | 6   | 7   | 8  | 9   | 10  | 11  | 12  | Rating |
|---------------------------------|-----|-----|-----|-----|-----|-----|-----|----|-----|-----|-----|-----|--------|
| Altarawneh H <sup>5</sup>       | Yes | Yes | n/a | Yes | Yes | Yes | No  | NR | Yes | No  | n/a | Yes | Good   |
| Rane M <sup>6</sup>             | Yes | Yes | n/a | Yes | Yes | Yes | NR  | NR | Yes | No  | n/a | Yes | Good   |
| Wang X <sup>24</sup>            | Yes | Yes | n/a | NR  | No  | No  | NR  | NR | Yes | No  | n/a | Yes | Poor   |
| Altarawneh H <sup>26</sup>      | Yes | Yes | n/a | Yes | Yes | Yes | No  | NR | Yes | No  | n/a | No  | Fair   |
| Cerqueira-Silva T <sup>28</sup> | Yes | Yes | n/a | Yes | Yes | Yes | No  | NR | Yes | No  | n/a | Yes | Good   |
| Carazo S <sup>67</sup>          | Yes | Yes | n/a | Yes | Yes | Yes | Yes | NR | Yes | No  | n/a | Yes | Good   |
| Vitale J <sup>14</sup>          | No  | Yes | n/a | Yes | Yes | Yes | CD  | NR | Yes | No  | n/a | Yes | Fair   |
| Willett B <sup>25</sup>         | Yes | Yes | n/a | Yes | Yes | No  | NR  | NR | Yes | No  | n/a | Yes | poor   |
| Chin E <sup>40</sup>            | Yes | Yes | n/a | Yes | Yes | Yes | No  | NR | Yes | No  | n/a | Yes | Good   |
| Ayoub H <sup>42</sup>           | Yes | Yes | n/a | Yes | Yes | Yes | No  | NR | Yes | No  | n/a | Yes | Good   |
| Carazo S <sup>29</sup>          | Yes | Yes | n/a | Yes | Yes | Yes | Yes | NR | Yes | Yes | NR  | Yes | Good   |
| Altarawneh H <sup>68</sup>      | Yes | Yes | n/a | Yes | Yes | Yes | NR  | NR | Yes | Yes | No  | No  | Fair   |
| Powell A <sup>57</sup>          | Yes | Yes | n/a | Yes | Yes | Yes | NR  | NR | Yes | Yes | no  | Yes | Fair   |
| Corrao G <sup>60</sup>          | Yes | Yes | No  | Yes | Yes | Yes | yes | NR | Yes | Yes | no  | Yes | Fair   |

n/a = not available; NR = not reported; CD, cannot determine.

Quality Assessment for Case-Control Studies (<https://www.nhlbi.nih.gov/health-topics/study-quality-assessment-tools>):

1. Was the research question or objective in this paper clearly stated and appropriate?
2. Was the study population clearly specified and defined?
3. Did the authors include a sample size justification?
4. Were controls selected or recruited from the same or similar population that gave rise to the cases (including the same timeframe)?
5. Were the definitions, inclusion and exclusion criteria, algorithms or processes used to identify or select cases and controls valid, reliable, and implemented consistently across all study participants?
6. Were the cases clearly defined and differentiated from controls?
7. If less than 100 percent of eligible cases and/or controls were selected for the study, were the cases and/or controls randomly selected from those eligible?
8. Was there use of concurrent controls?
9. Were the investigators able to confirm that the exposure/risk occurred prior to the development of the condition or event that defined a participant as a case?
10. Were the measures of exposure/risk clearly defined, valid, reliable, and implemented consistently (including the same time period) across all study participants?

11. Were the assessors of exposure/risk blinded to the case or control status of participants?
12. Were key potential confounding variables measured and adjusted statistically in the analyses? If matching was used, did the investigators account for matching during study analysis?



**Table S4 Risk of Bias Assessment for Cohort Studies**

| First author's name           | 1   | 2   | 3   | 4   | 5   | 6   | 7   | 8   | 9   | 10  | 11  | 12  | 13  | 14  | Rating |
|-------------------------------|-----|-----|-----|-----|-----|-----|-----|-----|-----|-----|-----|-----|-----|-----|--------|
| Smid M <sup>7</sup>           | Yes | Yes | NR  | Yes | n/a | No  | Yes | n/a | n/a | n/a | Yes | n/a | NR  | Yes | Poor   |
| Hall V <sup>10</sup>          | Yes | Yes | Yes | Yes | Yes | Yes | Yes | No  | No  | Yes | Yes | NR  | Yes | Yes | Good   |
| Lumley S <sup>18</sup>        | Yes | Yes | Yes | Yes | No  | No  | Yes | n/a | n/a | n/a | Yes | n/a | Yes | Yes | Fair   |
| Hansen C <sup>4</sup>         | Yes | Yes | Yes | Yes | n/a | No  | Yes | n/a | n/a | n/a | Yes | n/a | Yes | Yes | Fair   |
| Pilz S <sup>11</sup>          | Yes | Yes | Yes | Yes | n/a | No  | Yes | n/a | n/a | n/a | Yes | n/a | Yes | No  | Fair   |
| Sheehan M <sup>13</sup>       | Yes | Yes | Yes | Yes | n/a | No  | Yes | n/a | n/a | n/a | Yes | n/a | Yes | No  | Fair   |
| Wilkins J <sup>15</sup>       | Yes | Yes | Yes | Yes | No  | No  | Yes | n/a | n/a | n/a | Yes | n/a | No  | Yes | Fair   |
| Letizia A <sup>16</sup>       | Yes | Yes | Yes | Yes | n/a | Yes | Yes | No  | No  | No  | Yes | n/a | Yes | Yes | Good   |
| Abo-Leyah H <sup>17</sup>     | Yes | Yes | Yes | Yes | n/a | No  | Yes | n/a | n/a | n/a | Yes | n/a | NR  | No  | Fair   |
| Leidi A <sup>21</sup>         | Yes | Yes | Yes | Yes | No  | No  | Yes | n/a | n/a | n/a | Yes | n/a | Yes | No  | Poor   |
| Starrfelt J <sup>27</sup>     | Yes | Yes | Yes | Yes | n/a | No  | Yes | n/a | n/a | n/a | Yes | n/a | NR  | Yes | Fair   |
| Nordstrom P <sup>30</sup>     | Yes | Yes | Yes | Yes | n/a | No  | Yes | n/a | n/a | n/a | Yes | n/a | Yes | Yes | Fair   |
| Gallais F <sup>34</sup>       | Yes | Yes | Yes | Yes | No  | Yes | Yes | No  | No  | No  | Yes | No  | Yes | No  | Fair   |
| Krutikov M <sup>35</sup>      | Yes | Yes | Yes | Yes | No  | No  | Yes | n/a | n/a | n/a | Yes | n/a | NR  | Yes | Fair   |
| Harvey R <sup>36</sup>        | Yes | Yes | Yes | Yes | No  | No  | Yes | n/a | n/a | n/a | Yes | n/a | No  | No  | Poor   |
| Maier H <sup>37</sup>         | Yes | Yes | Yes | Yes | No  | Yes | Yes | No  | No  | No  | Yes | NR  | Yes | No  | Fair   |
| Chemaitelly H <sup>38</sup>   | Yes | Yes | Yes | Yes | n/a | No  | Yes | n/a | n/a | n/a | Yes | n/a | Yes | Yes | Fair   |
| Satwik R <sup>39</sup>        | No  | Yes | Yes | Yes | No  | No  | Yes | n/a | n/a | n/a | Yes | n/a | Yes | Yes | Fair   |
| Hall V <sup>9</sup>           | Yes | Yes | Yes | Yes | n/a | Yes | Yes | No  | No  | Yes | Yes | NR  | Yes | Yes | Good   |
| Rennert L <sup>12</sup>       | Yes | Yes | Yes | Yes | No  | No  | Yes | n/a | n/a | n/a | Yes | n/a | Yes | Yes | Fair   |
| Berec L <sup>69</sup>         | Yes | Yes | Yes | Yes | n/a | No  | Yes | n/a | n/a | n/a | Yes | n/a | NR  | Yes | Fair   |
| Pouwels K <sup>22</sup>       | Yes | Yes | Yes | Yes | n/a | Yes | Yes | Yes | No  | Yes | Yes | NR  | Yes | Yes | Good   |
| Pritchard E <sup>23</sup>     | Yes | Yes | Yes | Yes | n/a | Yes | Yes | Yes | No  | Yes | Yes | NR  | Yes | Yes | Good   |
| Abu-Raddad L <sup>8</sup>     | Yes | Yes | Yes | Yes | n/a | Yes | Yes | No  | No  | NR  | Yes | NR  | Yes | Yes | Fair   |
| Breathnach A <sup>19</sup>    | Yes | Yes | Yes | Yes | No  | No  | Yes | n/a | n/a | n/a | Yes | n/a | Yes | No  | Fair   |
| Manica M <sup>70</sup>        | No  | Yes | Yes | Yes | No  | No  | Yes | n/a | n/a | n/a | Yes | n/a | NR  | No  | Poor   |
| Jeffery-Smith A <sup>33</sup> | No  | Yes | Yes | Yes | No  | No  | Yes | n/a | n/a | n/a | Yes | n/a | Yes | No  | Poor   |

|                                              |     |     |     |     |     |     |     |     |     |     |     |     |     |     |      |
|----------------------------------------------|-----|-----|-----|-----|-----|-----|-----|-----|-----|-----|-----|-----|-----|-----|------|
| Chemaitelly H <sup>43</sup>                  | Yes | Yes | No  | Yes | n/a | No  | Yes | n/a | n/a | n/a | Yes | n/a | Yes | Yes | Fair |
| Braeye T <sup>41</sup>                       | Yes | Yes | Yes | Yes | n/a | No  | Yes | n/a | n/a | n/a | Yes | n/a | Yes | Yes | Fair |
| Office for National Statistics <sup>31</sup> | Yes | Yes | Yes | Yes | Yes | No  | Yes | No  | No  | Yes | Yes | NR  | NR  | Yes | Good |
| Petras M <sup>44</sup>                       | Yes | Yes | Yes | Yes | No  | Yes | Yes | No  | Yes | No  | Yes | No  | Yes | Yes | Good |
| Abu-Raddad U <sup>46</sup>                   | Yes | Yes | yes | Yes | n/a | Yes | Yes | No  | Yes | No  | Yes | NR  | Yes | No  | Fair |
| Bertolini R <sup>47</sup>                    | No  | Yes | No  | Yes | No  | Yes | Yes | No  | Yes | No  | Yes | No  | Yes | No  | Poor |
| Chemaitelly H <sup>48</sup>                  | Yes | Yes | Yes | Yes | n/a | Yes | Yes | No  | Yes | No  | Yes | NR  | Yes | Yes | Good |
| Vicentini M <sup>49</sup>                    | Yes | Yes | Yes | Yes | n/a | Yes | Yes | No  | Yes | No  | Yes | NR  | Yes | Yes | Good |
| Abu-Raddad U <sup>50</sup>                   | No  | Yes | No  | Yes | No  | Yes | Yes | No  | Yes | No  | Yes | No  | Yes | Yes | Fair |
| Michlmayr D <sup>51</sup>                    | Yes | Yes | Yes | Yes | n/a | Yes | Yes | No  | Yes | No  | Yes | NR  | Yes | Yes | Good |
| Lacy J <sup>52</sup>                         | Yes | Yes | Yes | Yes | No  | Yes | Yes | No  | Yes | No  | Yes | No  | NR  | No  | Fair |
| Ridgway JP <sup>53</sup>                     | Yes | CD  | NR  | Yes | n/a | Yes | Yes | No  | No  | No  | Yes | NR  | NR  | Yes | Poor |
| Spicer KB <sup>54</sup>                      | Yes | Yes | Yes | Yes | n/a | Yes | Yes | No  | Yes | No  | yes | NR  | Yes | No  | Fair |
| Cohen C <sup>55</sup>                        | Yes | Yes | Yes | Yes | No  | Yes | Yes | No  | Yes | No  | yes | No  | Yes | Yes | Good |
| Sun K <sup>56</sup>                          | Yes | Yes | Yes | Yes | No  | Yes | Yes | No  | Yes | No  | yes | No  | Yes | Yes | Good |
| Andeweg S <sup>66</sup>                      | Yes | Yes | NR  | Yes | NA  | Yes | Yes | No  | Yes | No  | yes | NR  | NR  | No  | Poor |
| Murugesan M <sup>58</sup>                    | Yes | Yes | Yes | Yes | No  | Yes | Yes | No  | Yes | No  | yes | No  | Yes | No  | Fair |
| Dhumal S <sup>59</sup>                       | Yes | Yes | Yes | Yes | NA  | Yes | Yes | No  | Yes | No  | yes | No  | Yes | Yes | Good |

|                           |     |     |     |     |    |     |     |    |     |    |     |     |     |     |      |
|---------------------------|-----|-----|-----|-----|----|-----|-----|----|-----|----|-----|-----|-----|-----|------|
| Narrainen F <sup>63</sup> | Yes | Yes | Yes | Yes | No | Yes | Yes | No | Yes | No | yes | No  | Yes | No  | Fair |
| Reynolds S <sup>62</sup>  | Yes | Yes | Yes | Yes | NA | Yes | Yes | No | Yes | No | yes | Yes | Yes | Yes | Good |
| Kubale J <sup>64</sup>    | Yes | Yes | Yes | Yes | NA | Yes | Yes | No | Yes | No | yes | No  | Yes | No  | Fair |
| Rothberg M <sup>65</sup>  | Yes | Yes | Yes | Yes | NA | Yes | Yes | No | Yes | No | yes | No  | Yes | Yes | Good |
| Smolenov I <sup>61</sup>  | Yes | Yes | Yes | Yes | No | Yes | Yes | No | Yes | No | yes | Yes | Yes | No  | Fair |

n/a = not available

NR = not reported

Quality Assessment Tool for Observational Cohort and Cross-Sectional Studies  
(<https://www.nhlbi.nih.gov/health-topics/study-quality-assessment-tools>):

1. Was the research question or objective in this paper clearly stated?
2. Was the study population clearly specified and defined?
3. Was the participation rate of eligible persons at least 50%?
4. Were all the subjects selected or recruited from the same or similar populations (including the same time period)? Were inclusion and exclusion criteria for being in the study prespecified and applied uniformly to all participants?
5. Was a sample size justification, power description, or variance and effect estimates provided?
6. For the analyses in this paper, were the exposure(s) of interest measured prior to the outcome(s) being measured?
7. Was the timeframe sufficient so that one could reasonably expect to see an association between exposure and outcome if it existed?
8. For exposures that can vary in amount or level, did the study examine different levels of the exposure as related to the outcome (e.g., categories of exposure, or exposure measured as continuous variable)?
9. Were the exposure measures (independent variables) clearly defined, valid, reliable, and implemented consistently across all study participants?
10. Was the exposure(s) assessed more than once over time?
11. Were the outcome measures (dependent variables) clearly defined, valid, reliable, and implemented consistently across all study participants?
12. Were the outcome assessors blinded to the exposure status of participants?
13. Was loss to follow-up after baseline 20% or less?
14. Were key potential confounding variables measured and adjusted statistically for their impact on the relationship between exposure(s) and outcome(s)?

## Section 5 Reference list

1. Stevens, G. A. *et al.* Guidelines for Accurate and Transparent Health Estimates Reporting: the GATHER statement. *The Lancet* **388**, e19–e23 (2016).
2. Page, M. J. *et al.* The PRISMA 2020 statement: an updated guideline for reporting systematic reviews. *BMJ* n71 (2021) doi:10.1136/bmj.n71.
3. Berek, L. *et al.* Protection provided by vaccination, booster doses and previous infection against covid-19 infection, hospitalisation or death over time in Czechia. *PLOS ONE* **17**, e0270801 (2022).
4. Hansen, C. H., Michlmayr, D., Gubbels, S. M., Mølbak, K. & Ethelberg, S. Assessment of protection against reinfection with SARS-CoV-2 among 4 million PCR-tested individuals in Denmark in 2020: a population-level observational study. *Lancet Lond. Engl.* **397**, 1204–1212 (2021).
5. Altarawneh, H. N. *et al.* Protection against the Omicron Variant from Previous SARS-CoV-2 Infection. *N. Engl. J. Med.* **386**, 1288–1290 (2022).
6. Rane, M. S. *et al.* Effectiveness of Covid-19 vaccines against symptomatic and asymptomatic SARS-CoV-2 infections in an urgent care setting. <http://medrxiv.org/lookup/doi/10.1101/2022.02.21.22271298> (2022) doi:10.1101/2022.02.21.22271298.
7. Šmíd, M. *et al.* Protection by vaccines and previous infection against the Omicron variant of SARS-CoV-2. *J. Infect. Dis.* jiac161 (2022) doi:10.1093/infdis/jiac161.
8. Abu-Raddad, L. J. *et al.* SARS-CoV-2 antibody-positivity protects against reinfection for at least seven months with 95% efficacy. *EClinicalMedicine* **35**, 100861 (2021).
9. Hall, V. J. *et al.* SARS-CoV-2 infection rates of antibody-positive compared with antibody-negative health-care workers in England: a large, multicentre, prospective cohort study (SIREN). *Lancet Lond. Engl.* **397**, 1459–1469 (2021).
10. Hall, V. *et al.* Protection against SARS-CoV-2 after Covid-19 Vaccination and Previous Infection. *N. Engl. J. Med.* **386**, 1207–1220 (2022).
11. Pilz, S. *et al.* SARS-CoV-2 re-infection risk in Austria. *Eur. J. Clin. Invest.* **51**, (2021).
12. Rennert, L. & McMahan, C. Risk of Severe Acute Respiratory Syndrome Coronavirus 2 (SARS-CoV-2) Reinfection in a University Student Population. *Clin. Infect. Dis.* **74**, 719–722 (2022).
13. Sheehan, M. M., Reddy, A. J. & Rothberg, M. B. Reinfection Rates Among Patients Who Previously Tested Positive for Coronavirus Disease 2019: A Retrospective Cohort Study. *Clin. Infect. Dis.* **73**, 1882–1886 (2021).

14. Vitale, J. *et al.* Assessment of SARS-CoV-2 Reinfection 1 Year After Primary Infection in a Population in Lombardy, Italy. *JAMA Intern. Med.* **181**, 1407 (2021).
15. Wilkins, J. T. *et al.* Serologic Status and SARS-CoV-2 Infection over 6 Months of Follow Up in Healthcare Workers in Chicago: A Cohort Study. *Infect. Control Hosp. Epidemiol.* 1–9 (2021) doi:10.1017/ice.2021.367.
16. Letizia, A. G. *et al.* SARS-CoV-2 seropositivity and subsequent infection risk in healthy young adults: a prospective cohort study. *Lancet Respir. Med.* **9**, 712–720 (2021).
17. Abo-Leyah, H. *et al.* The protective effect of SARS-CoV-2 antibodies in Scottish healthcare workers. *ERJ Open Res.* **7**, 00080–02021 (2021).
18. Lumley, S. F. *et al.* An Observational Cohort Study on the Incidence of Severe Acute Respiratory Syndrome Coronavirus 2 (SARS-CoV-2) Infection and B.1.1.7 Variant Infection in Healthcare Workers by Antibody and Vaccination Status. *Clin. Infect. Dis.* **74**, 1208–1219 (2022).
19. Breathnach, A. S. *et al.* Prior COVID-19 significantly reduces the risk of subsequent infection, but reinfections are seen after eight months. *J. Infect.* **82**, e11–e12 (2021).
20. Manica, M. *et al.* Risk of Symptomatic Infection During a Second Coronavirus Disease 2019 Wave in Severe Acute Respiratory Syndrome Coronavirus 2–Seropositive Individuals. *Clin. Infect. Dis.* **74**, 893–896 (2022).
21. Leidi, A. *et al.* Risk of Reinfection After Seroconversion to Severe Acute Respiratory Syndrome Coronavirus 2 (SARS-CoV-2): A Population-based Propensity-score Matched Cohort Study. *Clin. Infect. Dis.* **74**, 622–629 (2022).
22. Pouwels, K. B. *et al.* Effect of Delta variant on viral burden and vaccine effectiveness against new SARS-CoV-2 infections in the UK. *Nat. Med.* **27**, 2127–2135 (2021).
23. Pritchard, E. *et al.* Impact of vaccination on new SARS-CoV-2 infections in the United Kingdom. *Nat. Med.* **27**, 1370–1378 (2021).
24. Wang, X., Zein, J., Ji, X. & Lin, D.-Y. *Impact of Vaccination, Prior Infection, and Therapy on Delta and Omicron Variants.* <http://medrxiv.org/lookup/doi/10.1101/2022.03.24.22272901> (2022) doi:10.1101/2022.03.24.22272901.
25. Willett, B. J. *et al.* SARS-CoV-2 Omicron is an immune escape variant with an altered cell entry pathway. *Nat. Microbiol.* **7**, 1161–1179 (2022).

26. Altarawneh, H. N. *et al.* Effects of Previous Infection and Vaccination on Symptomatic Omicron Infections. *N. Engl. J. Med.* **387**, 21–34 (2022).
27. Starrfelt, J. *et al.* Age and product dependent vaccine effectiveness against SARS-CoV-2 infection and hospitalisation among adults in Norway: a national cohort study, July–November 2021. *BMC Med.* **20**, 278 (2022).
28. Cerqueira-Silva, T. *et al.* Vaccination plus previous infection: protection during the omicron wave in Brazil. *Lancet Infect. Dis.* S1473309922002882 (2022) doi:10.1016/S1473-3099(22)00288-2.
29. Carazo, S. *et al.* Protection against omicron (B.1.1.529) BA.2 reinfection conferred by primary omicron BA.1 or pre-omicron SARS-CoV-2 infection among health-care workers with and without mRNA vaccination: a test-negative case-control study. *Lancet Infect. Dis.* S1473-3099(22)00578–3 (2022) doi:10.1016/S1473-3099(22)00578-3.
30. Nordström, P., Ballin, M. & Nordström, A. Risk of SARS-CoV-2 reinfection and COVID-19 hospitalisation in individuals with natural and hybrid immunity: a retrospective, total population cohort study in Sweden. *Lancet Infect. Dis.* **22**, 781–790 (2022).
31. Coronavirus (COVID-19) Infection Survey, characteristics of people testing positive for COVID-19, UK - Office for National Statistics.  
<https://www.ons.gov.uk/peoplepopulationandcommunity/healthandsocialcare/conditionsanddiseases/bulletins/coronaviruscovid19infectionsurveycharacteristicsofpeopletestingpositiveforcovid19uk/25august2021>.
32. Omicron largely evades immunity from past infection or two vaccine doses | Imperial News | Imperial College London. <https://www.imperial.ac.uk/news/232698/omicron-largely-evades-immunity-from-past/>.
33. Jeffery-Smith, A. *et al.* Antibodies to SARS-CoV-2 protect against re-infection during outbreaks in care homes, September and October 2020. *Euro Surveill. Bull. Eur. Sur Mal. Transm. Eur. Commun. Dis. Bull.* **26**, (2021).
34. Gallais, F. *et al.* Evolution of antibody responses up to 13 months after SARS-CoV-2 infection and risk of reinfection. *EBioMedicine* **71**, 103561 (2021).
35. Krutikov, M. *et al.* Incidence of SARS-CoV-2 infection according to baseline antibody status in staff and residents of 100 long-term care facilities (VIVALDI): a prospective cohort study. *Lancet Healthy Longev.* **2**, e362–e370 (2021).

36. Harvey, R. A. *et al.* Association of SARS-CoV-2 Seropositive Antibody Test With Risk of Future Infection. *JAMA Intern. Med.* **181**, 672–679 (2021).
37. Maier, H. E. *et al.* Clinical spectrum of SARS-CoV-2 infection and protection from symptomatic re-infection. *Clin. Infect. Dis. Off. Publ. Infect. Dis. Soc. Am.* ciab717 (2021) doi:10.1093/cid/ciab717.
38. Chemaitelly, H. *et al.* Protection of Omicron sub-lineage infection against reinfection with another Omicron sub-lineage. *Nat. Commun.* **13**, 4675 (2022).
39. Satwik, R., Satwik, A., Katoch, S. & Saluja, S. ChAdOx1 nCoV-19 effectiveness during an unprecedented surge in SARS COV-2 infections. *Eur. J. Intern. Med.* **93**, 112–113 (2021).
40. Chin, E. T. *et al.* Protection against Omicron conferred by mRNA primary vaccine series, boosters, and prior infection. <http://medrxiv.org/lookup/doi/10.1101/2022.05.26.22275639> (2022) doi:10.1101/2022.05.26.22275639.
41. Braeye, T. *et al.* Vaccine effectiveness against onward transmission of SARS-CoV2-infection by variant of concern and time since vaccination, Belgian contact tracing, 2021. *Vaccine* **40**, 3027–3037 (2022).
42. Ayoub, H. H. *et al.* Estimating protection afforded by prior infection in preventing reinfection: Applying the test-negative study design. <http://medrxiv.org/lookup/doi/10.1101/2022.01.02.22268622> (2022) doi:10.1101/2022.01.02.22268622.
43. Chemaitelly, H., Bertollini, R. & Abu-Raddad, L. J. Efficacy of Natural Immunity against SARS-CoV-2 Reinfection with the Beta Variant. *N. Engl. J. Med.* **385**, 2585–2586 (2021).
44. Petráš, M. *et al.* The Effectiveness of Post-Vaccination and Post-Infection Protection in the Hospital Staff of Three Prague Hospitals: A Cohort Study of 8-Month Follow-Up from the Start of the COVID-19 Vaccination Campaign (COVANESS). *Vaccines* **10**, 9 (2021).
45. Altarawneh, H. N. *et al.* Protective Effect of Previous SARS-CoV-2 Infection against Omicron BA.4 and BA.5 Subvariants. *N. Engl. J. Med.* **387**, 1620–1622 (2022).
46. Abu-Raddad, L. J. *et al.* Introduction and expansion of the SARS-CoV-2 B.1.1.7 variant and reinfections in Qatar: A nationally representative cohort study. *PLOS Med.* **18**, e1003879 (2021).
47. Bertollini, R. *et al.* Associations of Vaccination and of Prior Infection With Positive PCR Test Results for SARS-CoV-2 in Airline Passengers Arriving in Qatar. *JAMA* **326**, 185 (2021).



48. Chemaitelly, H. *et al.* Duration of immune protection of SARS-CoV-2 natural infection against reinfection. *J. Travel Med.* taac109 (2022) doi:10.1093/jtm/taac109.
49. Vicentini, M. *et al.* Risk of SARS-CoV-2 Reinfection by Vaccination Status, Predominant Variant, and Time from Previous Infection: A Cohort Study in Italy. *SSRN Electron. J.* (2022) doi:10.2139/ssrn.4132329.
50. Abu-Raddad, L. J., Chemaitelly, H. & Bertollini, R. Severity of SARS-CoV-2 Reinfections as Compared with Primary Infections. *N. Engl. J. Med.* **385**, 2487–2489 (2021).
51. Michlmayr, D. *et al.* Observed protection against SARS-CoV-2 reinfection following a primary infection: A Danish cohort study among unvaccinated using two years of nationwide PCR-test data. *Lancet Reg. Health - Eur.* **20**, 100452 (2022).
52. Lacy, J. *et al.* Protective effect of a first SARS-CoV-2 infection from reinfection: a matched retrospective cohort study using PCR testing data in England. *Epidemiol. Infect.* **150**, e109 (2022).
53. Ridgway, J. P., Tideman, S., Wright, B. & Robicsek, A. Rates of COVID-19 Among Unvaccinated Adults With Prior COVID-19. *JAMA Netw. Open* **5**, e227650 (2022).
54. Spicer, K. B., Glick, C., Cavanaugh, A. M. & Thoroughman, D. Protective Immunity after Natural Infection with Severe Acute Respiratory Syndrome Coronavirus-2 (SARS-CoV-2) – Kentucky, USA, 2020. *Int. J. Infect. Dis.* **114**, 21–28 (2022).
55. Cohen, C. *et al.* SARS-CoV-2 incidence, transmission, and reinfection in a rural and an urban setting: results of the PHIRST-C cohort study, South Africa, 2020–21. *Lancet Infect. Dis.* **22**, 821–834 (2022).
56. Sun, K. *et al.* SARS-CoV-2 transmission, persistence of immunity, and estimates of Omicron’s impact in South African population cohorts. *Sci. Transl. Med.* **14**, eabo7081 (2022).
57. Powell, A. A. *et al.* Protection against symptomatic disease with the delta and omicron BA.1/BA.2 variants of SARS-CoV-2 after infection and vaccination in adolescents: national observational test-negative case control study, August 2021 to March 2022, England. <http://medrxiv.org/lookup/doi/10.1101/2022.08.19.22278987> (2022) doi:10.1101/2022.08.19.22278987.
58. Murugesan, M. *et al.* Protective effect conferred by prior infection and vaccination on COVID-19 in a healthcare worker cohort in South India. *PLOS ONE* **17**, e0268797 (2022).
59. Dhumal, S. *et al.* SARS-CoV-2 reinfection after previous infection and vaccine breakthrough infection through the second wave of pandemic in India: An observational study. *Int. J. Infect. Dis.* **118**, 95–103 (2022).

60. Corrao, G. *et al.* Protective action of natural and induced immunization against the occurrence of delta or alpha variants of SARS-CoV-2 infection: a test-negative case-control study. *BMC Med.* **20**, 52 (2022).
61. Smolenov, I. *et al.* Impact of previous exposure to SARS-CoV-2 and of S-Trimer (SCB-2019) COVID-19 vaccination on the risk of reinfection: a randomised, double-blinded, placebo-controlled, phase 2 and 3 trial. *Lancet Infect. Dis.* **22**, 990–1001 (2022).
62. Reynolds, S. L. *et al.* *Duration of Protection Against SARS-CoV-2 Reinfection and Associated Risk of Reinfection Assessed with Real-World Data.* <http://medrxiv.org/lookup/doi/10.1101/2022.02.25.22271515> (2022) doi:10.1101/2022.02.25.22271515.
63. Narrainen, F. *et al.* The protective effect of previous COVID-19 infection in a high-prevalence hospital setting. *Clin. Med.* **21**, e470–e474 (2021).
64. Kubale, J. *et al.* *Burden of SARS-CoV-2 and protection from symptomatic second infection in children.* <http://medrxiv.org/lookup/doi/10.1101/2022.01.03.22268684> (2022) doi:10.1101/2022.01.03.22268684.
65. Rothberg, M. B., Kim, P., Shrestha, N. K., Kojima, L. & Tereshchenko, L. G. Protection Against the Omicron Variant Offered by Previous Severe Acute Respiratory Syndrome Coronavirus 2 Infection: A Retrospective Cohort Study. *Clin. Infect. Dis.* ciac604 (2022) doi:10.1093/cid/ciac604.
66. Andeweg, S. P. *et al.* Protection of COVID-19 vaccination and previous infection against Omicron BA.1, BA.2 and Delta SARS-CoV-2 infections. *Nat. Commun.* **13**, 4738 (2022).
67. Carazo, S. *et al.* *Protection against Omicron re-infection conferred by prior heterologous SARS-CoV-2 infection, with and without mRNA vaccination.* <http://medrxiv.org/lookup/doi/10.1101/2022.04.29.22274455> (2022) doi:10.1101/2022.04.29.22274455.
68. Altarawneh, H. N. *et al.* *Protection of SARS-CoV-2 natural infection against reinfection with the Omicron BA.4 or BA.5 subvariants.* <http://medrxiv.org/lookup/doi/10.1101/2022.07.11.22277448> (2022) doi:10.1101/2022.07.11.22277448.
69. Berec, L. *et al.* *Real-life protection provided by vaccination, booster doses and previous infection against covid-19 infection, hospitalisation or death over time in the Czech Republic: a whole country retrospective view.* <http://medrxiv.org/lookup/doi/10.1101/2021.12.10.21267590> (2021) doi:10.1101/2021.12.10.21267590.

70. Manica, M. *et al.* *The risk of symptomatic reinfection during the second COVID-19 wave in individuals previously exposed to SARS-CoV-2.* <http://medrxiv.org/lookup/doi/10.1101/2021.04.14.21255502> (2021)  
doi:10.1101/2021.04.14.21255502.
